# Supplementary material for: Defining a COPD composite safety endpoint for demonstrating efficacy in clinical trials: results from the randomized, placebo-controlled UPLIFT® trial
Source: Springer Nature journal article supplement (doi:10.1186/s12931-016-0361-4), 2016-05-03
Supplement: MOESM1 [file 10111210]

**Argentina**

| <b>Centre number(s) / Investigator(s)</b> | <b>IRB or IEC (name/address)</b>                                                                                 | <b>IRB or IEC Chairperson</b> | <b>Informed Consent/Pt. Information Form Approval DD/MM/YY</b>                                 | <b>Protocol Approval DD/MM/YY</b> | <b>Am. 1 Approval DD/MM/YY</b> | <b>Am. 2 Approval DD/MM/YY</b> | <b>Am. 3 Approval DD/MM/YY</b> |
|-------------------------------------------|------------------------------------------------------------------------------------------------------------------|-------------------------------|------------------------------------------------------------------------------------------------|-----------------------------------|--------------------------------|--------------------------------|--------------------------------|
| 101 / Eduardo Schiavi                     | Comité de Ética<br>"Dr. Virgilio G. Foglia"<br>Tucumán 335 – 7°<br>"D" CP: 1059 –<br>Buenos Aires -<br>Argentina | Dr. Carlos A. Barclay         | 12/01/06(V 1 Adicional)<br>19/07/06(V 1<br>Complementario)<br>12/08/02 (V 3)<br>04/02/05 (V 5) | 26/04/02                          | 02/07/03                       | 12/01/06                       | 11/05/07                       |
| 102 / Juan C. Figuerosa Casas             | Comité de Ética<br>"Dr. Virgilio G. Foglia"<br>Tucumán 335 – 7°<br>"D" CP: 1059 –<br>Buenos Aires -<br>Argentina | Dr. Carlos A. Barclay         | 12/01/06(V 1 Adicional)<br>19/07/06(V 1<br>Complementario)<br>12/08/02 (V 3)<br>04/02/05 (V 5) | 26/04/02                          | 02/07/03                       | 12/01/06                       | 11/05/07                       |
| 103 / Edgardo Rhodius                     | Comité de Ética<br>"Dr. Virgilio G. Foglia"<br>Tucumán 335 – 7°<br>"D" CP: 1059 –<br>Buenos Aires -<br>Argentina | Dr. Carlos A. Barclay         | 12/01/06(V 1 Adicional)<br>19/07/06(V 1<br>Complementario)<br>12/08/02 (V 3)<br>04/02/05 (V 5) | 26/04/02                          | 02/07/03                       | 12/01/06                       | 11/05/07                       |
| 104 / Ricardo Gené                        | Comité de Ética<br>"Dr. Virgilio G. Foglia"<br>Tucumán 335 – 7°<br>"D" CP: 1059 –<br>Buenos Aires -<br>Argentina | Dr. Carlos A. Barclay         | 12/01/06(V 1 Adicional)<br>19/07/06(V 1<br>Complementario)<br>12/08/02 (V 3)<br>04/02/05 (V 5) | 26/04/02                          | 02/07/03                       | 12/01/06                       | 11/05/07                       |
| 105 / César Benito Sáenz                  | Comité de Ética<br>"Dr. Virgilio G. Foglia"<br>Tucumán 335 – 7°<br>"D" CP: 1059 –<br>Buenos Aires -              | Dr. Carlos A. Barclay         | 12/01/06(V 1 Adicional)<br>19/07/06(V 1<br>Complementario)<br>12/08/02 (V 3)<br>04/02/05 (V 5) | 26/04/02                          | 02/07/03                       | 12/01/06                       | 11/05/07                       |

| Argentina                          |                                                                                                                  |                        |                                                                                                |                            |                         |                         |                         |
|------------------------------------|------------------------------------------------------------------------------------------------------------------|------------------------|------------------------------------------------------------------------------------------------|----------------------------|-------------------------|-------------------------|-------------------------|
| Centre number(s) / Investigator(s) | IRB or IEC (name/address)                                                                                        | IRB or IEC Chairperson | Informed Consent/Pt. Information Form Approval DD/MM/YY                                        | Protocol Approval DD/MM/YY | Am. 1 Approval DD/MM/YY | Am. 2 Approval DD/MM/YY | Am. 3 Approval DD/MM/YY |
|                                    | Argentina                                                                                                        |                        |                                                                                                |                            |                         |                         |                         |
| 106 / Eduardo Giugno               | Comité de Ética<br>"Dr. Virgilio G. Foglia"<br>Tucumán 335 – 7°<br>"D" CP: 1059 –<br>Buenos Aires -<br>Argentina | Dr. Carlos A. Barclay  | 12/01/06(V 1 Adicional)<br>19/07/06(V 1<br>Complementario)<br>12/08/02 (V 3)<br>04/02/05 (V 5) | 26/04/02                   | 02/07/03                | 12/01/06                | 11/05/07                |
| 107 / Carlos Di Bartolo            | Comité de Ética<br>"Dr. Virgilio G. Foglia"<br>Tucumán 335 – 7°<br>"D" CP: 1059 –<br>Buenos Aires -<br>Argentina | Dr. Carlos A. Barclay  | 12/01/06(V 1 Adicional)<br>19/07/06(V 1<br>Complementario)<br>12/08/02 (V 3)<br>04/02/05 (V 5) | 26/04/02                   | 02/07/03                | 12/01/06                | 11/05/07                |
| 108 / María Cristina De Salvo      | Comité de Ética<br>"Dr. Virgilio G. Foglia"<br>Tucumán 335 – 7°<br>"D" CP: 1059 –<br>Buenos Aires -<br>Argentina | Dr. Carlos A. Barclay  | 12/01/06(V 1 Adicional)<br>19/07/06(V 1<br>Complementario)<br>12/08/02 (V 3)<br>04/02/05 (V 5) | 26/04/02                   | 02/07/03                | 12/01/06                | 11/05/07                |
| 109 / Eduardo Abbate               | Comité de Ética<br>"Dr. Virgilio G. Foglia"<br>Tucumán 335 – 7°<br>"D" CP: 1059 –<br>Buenos Aires -<br>Argentina | Dr. Carlos A. Barclay  | 12/01/06(V 1 Adicional)<br>19/07/06(V 1<br>Complementario)<br>12/08/02 (V 3)<br>04/02/05 (V 5) | 26/04/02                   | 02/07/03                | 12/01/06                | 11/05/07                |
| 110 / Ana María López              | Comité de Ética<br>"Dr. Virgilio G. Foglia" Tucumán                                                              | Dr. Carlos A. Barclay  | 12/01/06(V 1 Adicional)<br>19/07/06(V 1<br>Complementario)12/08/02                             | 26/04/02                   | 02/07/03                | 12/01/06                | 11/05/07                |

**Argentina**

| <b>Centre number(s) / Investigator(s)</b> | <b>IRB or IEC (name/address)</b>                    | <b>IRB or IEC Chairperson</b> | <b>Informed Consent/Pt. Information Form Approval DD/MM/YY</b> | <b>Protocol Approval DD/MM/YY</b> | <b>Am. 1 Approval DD/MM/YY</b> | <b>Am. 2 Approval DD/MM/YY</b> | <b>Am. 3 Approval DD/MM/YY</b> |
|-------------------------------------------|-----------------------------------------------------|-------------------------------|----------------------------------------------------------------|-----------------------------------|--------------------------------|--------------------------------|--------------------------------|
|                                           | 335 – 7° “D” CP:<br>1059 – Buenos Aires - Argentina |                               | (V 3) 04/02/05 (V 5)                                           |                                   |                                |                                |                                |

| Australia                          |                                                                    |                        |                                                         |                            |                         |                         |                         |
|------------------------------------|--------------------------------------------------------------------|------------------------|---------------------------------------------------------|----------------------------|-------------------------|-------------------------|-------------------------|
| Centre number(s) / Investigator(s) | IRB or IEC (name/address)                                          | IRB or IEC Chairperson | Informed Consent/Pt. Information Form Approval DD/MM/YY | Protocol Approval DD/MM/YY | Am. 1 Approval DD/MM/YY | Am. 2 Approval DD/MM/YY | Am. 3 Approval DD/MM/YY |
| 201 / Chris Steinfort              | St John Of God Health Care Ethics Committee                        | Professor Con Michael  | 06Jun2002                                               | 06Jun2002                  | 02Oct2003               | 02Feb2006               | 07Jun2007               |
| 202 / Matthew Peters               | Central Sydney Area Health Service HREC –CRGH Zone                 | Dr Garry Pearce        | 25Jul2002                                               | 25Jul2002                  | 19Aug2003               | 21Mar2006               | 19Jun2007               |
| 203 / Patrick Carroll              | Redcliffe-Caboolture Health Service District Ethics Committee      | Mark Zgrajewski        | 05Jun2002                                               | 05Jun2002                  | 06Aug2003               | 01Feb2006               | 06Jun2007               |
| 204 / Graham Simpson               | Cairns Base Hospital Ethics Committee                              | Marlane Byrne          | 04Jul2002                                               | 04Jul2002                  | 31Jul2003               | 23Mar2006               | 21Jun2007               |
| 205 / David Freiberg               | South Western Sydney Area Health Service HREC                      | Prof Hugh Dickson      | 25Jul2002                                               | 25Jul2002                  | 23Jul2003               | 22Dec2005               | 06Jun2007               |
| 206 / Paul Fogarty                 | Eastern Health Research and Ethics Committee                       | Lee Hamley             | 25Jul2002                                               | 25Jul2002                  | 21Aug2003               | 18Jan2006               | 19Jul07                 |
| 207 / Richard Watts                | ACHA Research & Ethics Committee/ Bellberry HREC                   | Dr Brian Stoffell      | 25Mar2003                                               | 20Nov2002                  | 15Oct2003               | 18Jan2006               | 20Jun2007               |
| 209 / John Wheatley                | Western Sydney Area Health Service Human research Ethics Committee | Prof Stephen Leader    | 17Oct2002                                               | 17Oct2002                  | 28Jul2003               | 03Feb2006               | 29May2007               |

| Austria                            |                                                                                                                     |                                  |                                                                                                                         |                            |                          |                         |                         |
|------------------------------------|---------------------------------------------------------------------------------------------------------------------|----------------------------------|-------------------------------------------------------------------------------------------------------------------------|----------------------------|--------------------------|-------------------------|-------------------------|
| Centre number(s) / Investigator(s) | IRB or IEC (name/address)                                                                                           | IRB or IEC Chairperson           | Informed Consent/Pt. Information Form Approval DD/MM/YY                                                                 | Protocol Approval DD/MM/YY | Am. 1 Approval DD/MM/YY  | Am. 2 Approval DD/MM/YY | Am. 3 Approval DD/MM/YY |
| 301 / Norbert Vetter               | Ethikkommission der Stadt Wien<br>Thomas Klestil Platz 8<br>A-1130 Wien,<br>EK.Nr.: 02-057-0602                     | Frau<br>Dr. Karin Spacek         | 14.Nov.02 (Vers. II)<br>01.Dec.04 (Vers. III)<br>27.Dec.05 (Long Term)<br>30.Aug.06 (Add. Info.)                        | 14.Nov.02                  | Not submitted in Austria | 27.Dec.05               | 15. Jun.07              |
| 302 / Otto Burghuber               | Ethikkommission der Stadt Wien<br>Thomas Klestil Platz 8<br>A-1130 Wien,<br>EK.Nr.: 02-057-0602                     | Frau<br>Dr. Karin Spacek         | 14.Nov.02 (Vers. II)<br>01.Dec.04 (Vers. III)<br>27.Dec.05 (Long Term)<br>30.Aug.06 (Add. Info.)                        | 14.Nov.02                  | Not submitted in Austria | 27.Dec.05               | 15.Jun.07               |
| 303 / Dr. Christian Hesse          | Ethikkommission der medizinischen Universität Graz<br>Auenbruggerplatz 29<br>A-8036 Graz<br>EK.Nr.: 12-177 ex 01/02 | Herr Univ. Prof. Dr. Peter Rehak | 31.Oct.02 (Vers. II)<br>15.Jul.04 (Vers. III)<br>12.Jan.06 (Vers. IV)<br>17.Jan.06 (Long Term)<br>11.Oct.06 (Add. Info) | 31.Oct.02                  | Not submitted in Austria | 17.Jan.06               | 11.Jun.07               |
| 304 / Martin Flicker               | Ethikkommission der medizinischen Universität Graz<br>Auenbruggerplatz 29<br>A-8036 Graz<br>EK.Nr.: 12-189 ex       | Herr Univ. Prof. Dr. Peter Rehak | 31.Oct.02 (Vers. II)<br>12.Jan.06 (Vers. III)<br>17.Jan.06 (Long Term)                                                  | 31.Oct.02                  | Not submitted in Austria | 17.Jan.06               | 11.Jun.07               |

| Austria                            |                                                                                                                          |                                             |                                                                                                            |                            |                          |                         |                         |
|------------------------------------|--------------------------------------------------------------------------------------------------------------------------|---------------------------------------------|------------------------------------------------------------------------------------------------------------|----------------------------|--------------------------|-------------------------|-------------------------|
| Centre number(s) / Investigator(s) | IRB or IEC (name/address)                                                                                                | IRB or IEC Chairperson                      | Informed Consent/Pt. Information Form Approval DD/MM/YY                                                    | Protocol Approval DD/MM/YY | Am. 1 Approval DD/MM/YY  | Am. 2 Approval DD/MM/YY | Am. 3 Approval DD/MM/YY |
|                                    | 01/02                                                                                                                    |                                             | 11.Oct.06<br>(Add. Info)                                                                                   |                            |                          |                         |                         |
| 305 / Christian Kähler             | Ethikkommission der medizinischen Universität Innsbruck<br>Innrain 43<br>A-6020 Innsbruck<br>EK.Nr.: UN 1626<br>197/4.14 | Herr Univ. Prof. Dipl. Ing. Dr. Peter Lukas | 30.Aug.02<br>(Ver. II)<br>17.Dec.04<br>(Vers. III)<br>27.Jan.06<br>(Long Term)<br>20.Oct.06<br>(Add. Info) | 30.Aug.02                  | Not submitted in Austria | 27.Jan.06               | 01.Jun.07               |

| Belgium                            |                                                                                                         |                        |                                                         |                            |                         |                         |                         |
|------------------------------------|---------------------------------------------------------------------------------------------------------|------------------------|---------------------------------------------------------|----------------------------|-------------------------|-------------------------|-------------------------|
| Centre number(s) / Investigator(s) | IRB or IEC (name/address)                                                                               | IRB or IEC Chairperson | Informed Consent/Pt. Information Form Approval DD/MM/YY | Protocol Approval DD/MM/YY | Am. 1 Approval DD/MM/YY | Am. 2 Approval DD/MM/YY | Am. 3 Approval DD/MM/YY |
| 402 / Greet Bral                   | Etische Commissie<br>Jan Yperman<br>Ziekenhuis<br>Briekestraat, 12<br>B – Yeper 8900                    | Mr. J.Vandenbulcke     | 03/06/2002                                              | 20/11/2002                 | Not Applicable          | 20/12/2007              | 06/12/2007              |
| 403 / Kris Carron                  | Medische Etische Commissie<br>Heilig HartZiekenhuis<br>Wilgenstraat, 2<br>B – 8800 Roeselare            | Dr. L. Marcelis        | 03/06/2002                                              | 22/10/2002                 | 15/09/2003              | 23/01/2006              | 20/08/2007              |
| 404 / D. Coolen                    | Etische Commissie<br>Campus Drie Eicken<br>D T 506<br>Universiteitsplein, 1<br>B – 2610 Wilrijk         | Prof. P. De Deyn       | 03/06/2002                                              | 03/07/2002                 | 15/11/2003              | 08/02/2006              | Not available           |
| 405 / Wilfried De Backer           | Etische Commissie<br>UZA<br>Wilrijkstraat, 10<br>B – 2650 Edegem                                        | Prof. P. Cras          | 03/06/2002                                              | 19/08/2002                 | 18/07/2003              | 07/02/2006              | 24/05/2007              |
| 406 / Tom De Beukelaar             | Etische Commissie<br>Campus Drie Eicken<br>D T 506<br>Universiteitsplein, 1<br>B – 2610 Wilrijk         | Prof. P. De Deyn       | 03/06/2002                                              | 04/09/2002                 | 05/11/2003              | 08/02/2006              | 11/07/2007              |
| 407 / M. Decramer                  | Commissie Medische Ethiek van de UZ KU<br>Leuven -<br>Gasthuisberg<br>Herestraat, 49<br>B – 3000 Leuven | Prof. J. Vermynen      | 03/06/2002                                              | 19/06/2002                 | 08/07/2003              | 11/01/2006              | 03/12/2007              |

**Belgium**

| <b>Centre number(s) / Investigator(s)</b> | <b>IRB or IEC (name/address)</b>                                                                      | <b>IRB or IEC Chairperson</b> | <b>Informed Consent/Pt. Information Form Approval DD/MM/YY</b> | <b>Protocol Approval DD/MM/YY</b> | <b>Am. 1 Approval DD/MM/YY</b> | <b>Am. 2 Approval DD/MM/YY</b> | <b>Am. 3 Approval DD/MM/YY</b> |
|-------------------------------------------|-------------------------------------------------------------------------------------------------------|-------------------------------|----------------------------------------------------------------|-----------------------------------|--------------------------------|--------------------------------|--------------------------------|
| 409 / Rene Deman                          | Ethische Commissie<br>AZ Groeninge<br>Campus Saint Maarten<br>Loofstraat, 43<br>B – 8500 Kortrijk     | Dr. L. Van Lysebeth           | 03/06/2002                                                     | 10/09/2002                        | 07/10/2003                     | 27/11/2006                     | 04/12/2007                     |
| 412 / Bruno Dewispelaere                  | Medische Ethische<br>Commissie AZ<br>Sint- Josef<br>Steenweg op<br>Merksplas, 44<br>B – 2300 Turnhout | Dr. B. Reynders               | 03/06/2002                                                     | 22/08/2002                        | 01/10/2003                     | 11/12/2006                     | 01/10/2007                     |
| 413 / P. Driesen                          | Etische Comité Saint<br>Elisabeth Ziekenhuis<br>Rubenstraat, 166<br>B – 2300 Turnhout                 | Mr. K. Ackaert                | 03/06/2002                                                     | 26/06/2002                        | 16/06/2003                     | 31/01/2006                     | 18/05/2007                     |
| 414 / Willy Elinck                        | Commissie voor<br>Medische Ethiek<br>Jan Palfijn<br>Henridunantlaan, 5<br>B – 9000 Gent               | Dr. L. Van Nimmen             | 03/06/2002                                                     | 09/09/2002                        | Not<br>Applicable              | 13/03/2006                     | 29/10/2007                     |
| 417 / Yves Mentens                        | Ethische Commissie<br>AZ Sint-Elisabeth<br>Nederrij, 133<br>B – 2200 Herentals                        | Dr. M. Vansteenkiste          | 03/06/2002                                                     | 17/09/2002                        | 16/09/2003                     | 06/12/2006                     | 30/05/2007                     |
| 418 / Guy Joos                            | Etische Commissie<br>UZ Gent<br>De Pintelaan, 185<br>B – 9000 Gent                                    | Prof. M. Bogaert              | 03/06/2002                                                     | 05/09/2002                        | Not<br>Applicable              | Not<br>Applicable              | Not<br>Applicable              |
| 420 / Kurt Vandeurzen                     | Commissie voor<br>Medische Ethiek<br>Maesenveld, 1                                                    | Dr. F. Ulens                  | 03/06/2002                                                     | 18/09/2002                        | 10/09/2003                     | 15/03/2006                     | 21/05/2007                     |



| Belgium                            |                                                                                                                                   |                        |                                                         |                            |                         |                         |                         |
|------------------------------------|-----------------------------------------------------------------------------------------------------------------------------------|------------------------|---------------------------------------------------------|----------------------------|-------------------------|-------------------------|-------------------------|
| Centre number(s) / Investigator(s) | IRB or IEC (name/address)                                                                                                         | IRB or IEC Chairperson | Informed Consent/Pt. Information Form Approval DD/MM/YY | Protocol Approval DD/MM/YY | Am. 1 Approval DD/MM/YY | Am. 2 Approval DD/MM/YY | Am. 3 Approval DD/MM/YY |
|                                    | B – 3900 Overpelt                                                                                                                 |                        |                                                         |                            |                         |                         |                         |
| 421 / Dirk Van Renterghem          | Etische Commissie AZ<br>Sint Jan<br>Ruddershove, 10<br>B – 8000 Brugge                                                            | Dr. Van Droogenbroek   | 03/06/2002                                              | 14/08/2002                 | 26/06/2003              | 26/01/2006              | 21/11/2007              |
| 422 / Luc Van Zandweghe            | Etische Commissie AZ<br>Sint Blasius<br>Kroonveldlaan, 50<br>B – 9200<br>Dendermonde                                              | Dr. B. D' Haen         | 03/06/2002                                              | 18/09/2002                 | 13/11/2003              | 27/03/2006              | 27/07/2007              |
| 423 / Wim Verhaeghe                | Etische Commissie<br>Ziekenhuis H. Serruys<br>Kaïrostraat, 84<br>B – 8400 Oostende                                                | Dr. G. Pulinckx        | 03/06/2002                                              | 20/09/2002                 | 19/11/2003              | 03/02/2006              | 18/05/2007              |
| 424 / W. Vincken                   | Commissie Medische Ethiek<br>UZ Brussel<br>Laarbeeklaan, 101<br>B – 1090 Brussels                                                 | Prof. P. Devroey       | 03/06/2002                                              | 01/08/2002                 | 04/07/2003              | 09/01/2006              | 14/07/2007              |
| 428 / Luc Delaunois                | Comité d'Ethique Hospitalier<br>Clinique Universitaire<br>de Mont-Godinne<br>Ave. Docteur Gaston<br>Ghêrâsse, 1<br>B – 5530 Yvoir | Dr. A. Evrard          | 03/06/2002                                              | 03/10/2002                 | 16/07/2003              | 01/02/2006              | 23/05/2007              |

| Belgium                            |                                                                                                                              |                        |                                                         |                            |                         |                         |                         |
|------------------------------------|------------------------------------------------------------------------------------------------------------------------------|------------------------|---------------------------------------------------------|----------------------------|-------------------------|-------------------------|-------------------------|
| Centre number(s) / Investigator(s) | IRB or IEC (name/address)                                                                                                    | IRB or IEC Chairperson | Informed Consent/Pt. Information Form Approval DD/MM/YY | Protocol Approval DD/MM/YY | Am. 1 Approval DD/MM/YY | Am. 2 Approval DD/MM/YY | Am. 3 Approval DD/MM/YY |
| 429 / Duchatelet                   | Comité d’Ethique RHMS<br>Clinique Louis Cathy<br>Rue Louis Cathy, 136<br>B – 7331 Baudour                                    | Dr. de Brouckère       | 03/06/2002                                              | 15/10/2002                 | 01/10/2003              | 23/02/2006              | Not available           |
| 432 / André Nosedà                 | Comité d’Ethique Hospitalier Brugman<br>Place A. Van Gehuchten, 4<br>B – 1020 Brussels                                       | Dr. J. Valsamis        | 03/06/2002                                              | 10/10/2002                 | 18/09/2003              | 14/03/2006              | 10/07/2007              |
| 433 / Guy Nuttin                   | Commission d’Ethique CHR de Tournai<br>Boulevard Lalaing, 39<br>B – 7500 Tournai                                             | Dr. Desplanque         | 03/06/2002                                              | 30/01/2003                 | 18/08/2003              | 22/12/2005              | 11/05/2007              |
| 434 / Daniel Rodenstein            | Commission d’Ethique Biomédicale<br>Hospitalo Facultaire<br>Ave Hippocrate, 55<br>Tour Harvey, niveau 0<br>B – 1200 Brussels | Dr. JM Maloteaux       | 03/06/2002                                              | 09/10/2002                 | 03/11/2004              | 15/11/2006              | 18/05/2007              |
| 435 / Annick Thibaut-Baudrez       | CRP Santé Comité National d’Ethique<br>Hôpital Princesse Marie Astrid<br>Rue Thomas Edison, 1AB<br>B – 1210 Luxembourg       | Dr. Michel             | 03/06/2002                                              | 01/10/2002                 | 31/05/2007              | 31/05/2007              | Not available           |

| Belgium                            |                                                                                                                             |                        |                                                         |                            |                         |                         |                         |
|------------------------------------|-----------------------------------------------------------------------------------------------------------------------------|------------------------|---------------------------------------------------------|----------------------------|-------------------------|-------------------------|-------------------------|
| Centre number(s) / Investigator(s) | IRB or IEC (name/address)                                                                                                   | IRB or IEC Chairperson | Informed Consent/Pt. Information Form Approval DD/MM/YY | Protocol Approval DD/MM/YY | Am. 1 Approval DD/MM/YY | Am. 2 Approval DD/MM/YY | Am. 3 Approval DD/MM/YY |
| 437 / Guy Vandermoten              | Commission d'Ethique Centre Hospitalier Régional de Namur<br>Ave Albert 1 <sup>er</sup> , 185<br>B – 5000 Namur             | Dr. A. Fox             | 03/06/2002                                              | 17/09/2002                 | Not available           | 25/04/2006              | 22/05/2007              |
| 438 / Patricia Wackeniers-Genard   | Commission d'Ethique CHU Ambroise Paré<br>Commission d'Ethique<br>Boulevard Kennedy, 2<br>B – 7000 Mons                     | Dr. D. Diana           | 03/06/2002                                              | 26/06/2002                 | 24/09/2003              | 19/04/2006              | 13/09/2007              |
| 439 / Sandra Baldassarre           | Commission d'Ethique<br>H.U. Erasme<br>Route de Lennik, 808<br>B - 1070 Brussels                                            | Prof. A. Herchuelz     | 03/06/2002                                              | 24/09/2002                 | 26/08/2003              | 24/01/2006              | 02/10/2007              |
| 440 / Schlessler                   | CRP Santé Comité National d'Ethique<br>Centre Hospitalier de Luxembourg<br>Rue Thomas Edison, 1AB<br>L – 1417<br>Luxembourg | Dr. G. Michel          | 03/06/2002                                              | 06/11/2002                 | 21/10/2004              | 02/05/2007              | Not available           |

| Brazil                             |                                                                                        |                        |                                                                                                        |                            |                         |                         |                         |
|------------------------------------|----------------------------------------------------------------------------------------|------------------------|--------------------------------------------------------------------------------------------------------|----------------------------|-------------------------|-------------------------|-------------------------|
| Centre number(s) / Investigator(s) | IRB or IEC (name/address)                                                              | IRB or IEC Chairperson | Informed Consent/Pt. Information Form Approval DD/MM/YY                                                | Protocol Approval DD/MM/YY | Am. 1 Approval DD/MM/YY | Am. 2 Approval DD/MM/YY | Am. 3 Approval DD/MM/YY |
| 501 / Sérgio Menna Barreto         | Comissão de Pesquisa e Ética em Saúde do Hospital de Clínicas de Porto Alegre          | Sérgio Pinto Machado   | v1 27Mar02-13May02; v2 09Mar05- 08Apr05; v3 15May06-10Aug06; vital ICF - missing                       | 13May02                    | N/A                     | 20Feb06                 | N/A                     |
| 502 / Joao Carlos Corrêa           | Comitê de Ética em Pesquisa em Seres Humanos                                           | Sylvio Carlos Corrêa   | v1 27Mar02-07may02; v2 09Mar05- 05Apr05; v3 15May06-03aug06; vital ICF-18Jan06                         | 07May02                    | N/A                     | 18Jan06                 | N/A                     |
| 503 / Luiz Carlos Corrêa da Silva  | Comitê de Ética em Pesquisa da Irmandade da Santa Casa de Misericórdia de Porto Alegre | Claudio Teloken        | v1 27Mar02-07May02; v1.1 24Sep02- 29Oct02; v2 09Nov04-05Oct05; v3 25Jul06- 29Aug06; vital ICF- 29Aug06 | 07May02                    | N/A                     | 29Aug06                 | N/A                     |
| 504 / Elie Fiss                    | Comitê de Ética em Pesquisa da Faculdade de Medicina do ABC                            | Márcia Tamosauskas     | v1 27Mar02-16May02; v2 09Mar05- 11May05; v3 25Jul06-22Aug06; vital ICF-13Mar06                         | 16May02                    | N/A                     | 13Mar06                 | N/A                     |
| 505 / Antônio Chibante             | Comitê de Ética em Pesquisa                                                            | Fernanda Medeiros      | v1 27Mar02-20May02; v2 09Mar05- 09Dec05; v3 09Mar06-missing; v4 25Jul06-21Aug06; vital ICF-06Jul06     | 20May02                    | N/A                     | 06Jul06                 | N/A                     |

| Brazil                             |                                                                                         |                             |                                                                                      |                            |                         |                         |                         |
|------------------------------------|-----------------------------------------------------------------------------------------|-----------------------------|--------------------------------------------------------------------------------------|----------------------------|-------------------------|-------------------------|-------------------------|
| Centre number(s) / Investigator(s) | IRB or IEC (name/address)                                                               | IRB or IEC Chairperson      | Informed Consent/Pt. Information Form Approval DD/MM/YY                              | Protocol Approval DD/MM/YY | Am. 1 Approval DD/MM/YY | Am. 2 Approval DD/MM/YY | Am. 3 Approval DD/MM/YY |
| 506 / Waldo Mattos                 | Comitê de Ética em Pesquisa do Grupo Hospitalar Conceição                               | Julio Baldissertotto        | v1 27mar02-12Jun02; v2 09Mar05- 11Aug05; v3 25Jul06-18Oct06; vital ICF-16May06       | 12Jun02                    | N/A                     | 16May06                 | N/A                     |
| 507 / Carlos Fritscher             | Comitê de Ética em Pesquisa da PUCRS                                                    | José Roberto Goldim         | v1 27Mar02-14May02; v2 09Mar05- 05Aug05; v3 15May06-24Aug06; vital ICF-20Mar06       | 14May02                    | N/A                     | 20Mar06                 | 15Jan08                 |
| 508 / Julio Abreu de Oliveira      | Comitê de Ética em Pesquisa da Universidade Federal de Juiz de Fora                     | Sonia Maria Dias            | v1 27Mar02-15May02<br>v2 09Mar05-19May05<br>v3 15May06-17Aug06<br>vital ICF- 16Feb06 | 15May02                    | 18Dec03                 | 16Feb06                 | N/A                     |
| 510 / Dr. Emilio Pizzichini        | Comitê de Ética em Pesquisa com Seres Humanos da Universidade Federal de Santa Catarina | Washington Portela de Souza | v1 27Mar02-27May02<br>v2 09Mar05-25Apr05<br>v3 15May06-28Aug06<br>vital ICF- 06Mar06 | 27May02                    | N/A                     | 06Mar06                 | N/A                     |
| 511 / Alvaro Cruz                  | Comitê de Ética em Pesquisa - CEP / MCO / UFBA                                          | Antônio dos Santos Barata   | v1 27Mar02-05Jun02<br>v2 09Mar05-30May05<br>v3 15May06-08Dec06                       | 05Jun02                    | 03Dec03                 | 29Apr06                 | 21Jan08                 |

| Brazil                             |                                                                                         |                            |                                                                                      |                            |                         |                         |                         |
|------------------------------------|-----------------------------------------------------------------------------------------|----------------------------|--------------------------------------------------------------------------------------|----------------------------|-------------------------|-------------------------|-------------------------|
| Centre number(s) / Investigator(s) | IRB or IEC (name/address)                                                               | IRB or IEC Chairperson     | Informed Consent/Pt. Information Form Approval DD/MM/YY                              | Protocol Approval DD/MM/YY | Am. 1 Approval DD/MM/YY | Am. 2 Approval DD/MM/YY | Am. 3 Approval DD/MM/YY |
|                                    |                                                                                         |                            | vital ICF- 29Apr06                                                                   |                            |                         |                         |                         |
| 512 / Carlos a. de Castro Pereira  | Comitê de Ética em Pesquisa do IAMSPE/HSPE - "F.M.O."                                   | Ana Maria Moraes deAndrade | v1 27Mar02-15Jul02<br>v2 09Mar05-26Apr05<br>v3 15May06-29Aug06<br>vital ICF- 21Feb06 | 15Jul02                    | 13Feb04                 | 21Feb06                 | N/A                     |
| 513 / Alberto Cukier               | Comissão de Ética para Análise de Projetos de Pesquisa - CAPPesq                        | Euclides Ayres de Castilho | v1 27Mar02-25Jul02<br>v2 09Mar05-22Jun05<br>v3 15May06-13Sep06<br>vital ICF- 14Jun06 | 25Jul02                    | 18Feb04                 | 14Jun06                 | N/A                     |
| 514 / Roberto Stirbulov            | Comitê de Ética em Pesquisa em Seres Humanos da Santa Casa de Misericórdia de São Paulo | Daniel Romero Muñoz        | v1 27Mar02-19Aug02<br>v2 09Mar05-14Oct05<br>v3 15May06-21Dec06<br>vital ICF- 02Jun06 | 19Aug02                    | 27Feb04                 | 21May06                 | N/A                     |
| 515 / Jose Roberto Brito Jardim    | Comitê de Ética em Pesquisa da universidade Federal de São Paulo / Hospital São Paulo   | José Osmar Medina Pestana  | v1 27Mar02-20Sep02<br>v2 09Mar05-01Dec05<br>v3 15May06-29Sep06<br>vital ICF- 13Feb06 | 20Sep02                    | N/A                     | 13Feb06                 | N/A                     |

**Czechia**

| <b>Centre number(s) / Investigator(s)</b> | <b>IRB or IEC (name/address)</b>                                                                              | <b>IRB or IEC Chairperson</b> | <b>Informed Consent/Pt. Information Form Approval DD/MM/YY</b> | <b>Protocol Approval DD/MM/YY</b> | <b>Am. 1 Approval DD/MM/YY</b> | <b>Am. 2 Approval DD/MM/YY</b> | <b>Am. 3 Approval DD/MM/YY</b> |
|-------------------------------------------|---------------------------------------------------------------------------------------------------------------|-------------------------------|----------------------------------------------------------------|-----------------------------------|--------------------------------|--------------------------------|--------------------------------|
| 701 / Kveta Kalandrova                    | Etická komise<br>Fakultní nemocnice a<br>Lékařské fakulty UK<br>Plzeň<br>tř. Dr. E. Beneše 13<br>305 99 Plzeň | Dr. Jindřich Fínek            | 20.6.2002                                                      | 20.6.2002                         | 11.9.2003                      | 9.2.2006                       | 16.8.2007                      |
| 702 / Marie Novakova                      | Etická komise<br>Fakultní nemocnice a<br>Lékařské fakulty UK<br>Plzeň<br>tř. Dr. E. Beneše 13<br>305 99 Plzeň | Dr. Jindřich Fínek            | 20.6.2002                                                      | 20.6.2002                         | 11.9.2003                      | 9.2.2006                       | 16.8.2007                      |
| 703 / Petr Hartman                        | Etická komise<br>Fakultní nemocnice a<br>Lékařské fakulty UK<br>Plzeň<br>tř. Dr. E. Beneše 13<br>305 99 Plzeň | Dr. Jindřich Fínek            | 20.6.2002                                                      | 20.6.2002                         | 11.9.2003                      | 9.2.2006                       | 16.8.2007                      |
| 704 / Viktor Jenovsky                     | Etická komise<br>Plicní a interní<br>ordinace<br>Teraziňská - 487<br>410 02, Lovosice                         | Dr. Roman Záhora              | 17.9.2002                                                      | 17.9.2002                         | 1.10.2003                      | 2.3.2006                       |                                |
| 705 / Jan Vacek                           | Etická komise<br>Nemocnice Jablonec<br>nad Nisou<br>Nemocniční 15<br>466 01 Jablonec nad<br>Nisou             | Dr. Petr Žák                  | 30.10.2002                                                     | 30.10.2002                        | 9.9.2003                       | 20.3.2006                      | 24.10.2007                     |
| 706 / Viktor Kasak                        | Etická komise<br>při Institutu klin. a<br>exp. Medicíny                                                       | Dr. Vladimír Staněk           | 12.6.2002                                                      | 12.6.2002                         | 8.10.2003                      | 8.2.2006                       | 11.7.2007                      |

**Czechia**

| <b>Centre number(s) / Investigator(s)</b> | <b>IRB or IEC (name/address)</b>                                                                                | <b>IRB or IEC Chairperson</b> | <b>Informed Consent/Pt. Information Form Approval DD/MM/YY</b> | <b>Protocol Approval DD/MM/YY</b> | <b>Am. 1 Approval DD/MM/YY</b> | <b>Am. 2 Approval DD/MM/YY</b> | <b>Am. 3 Approval DD/MM/YY</b> |
|-------------------------------------------|-----------------------------------------------------------------------------------------------------------------|-------------------------------|----------------------------------------------------------------|-----------------------------------|--------------------------------|--------------------------------|--------------------------------|
|                                           | Thomayerově FN<br>Videňská - 800<br>140 59 Praha - 4                                                            |                               |                                                                |                                   |                                |                                |                                |
| 707 / Jiri Erban                          | Etická komise SPLIN<br>s.r.o.<br>Nestátní zdravotnické<br>zařízení<br>Čimická - 37<br>182 00 Praha - 8          | Dr. Oldřich Koberec           | 9.10.2002                                                      | 9.10.2002                         | 29.7.2003                      | 20.3.2006                      | 8.8.2007                       |
| 708 / Pavel Kalina                        | Etická komise SPLIN<br>s.r.o.<br>Nestátní zdravotnické<br>zařízení<br>Čimická - 37<br>182 00 Praha - 8          | Dr. Oldřich Koberec           | 9.10.2002                                                      | 9.10.2002                         | 29.7.2003                      | 20.3.2006                      | 8.8.2007                       |
| 709 / Jan Chlumsky                        | Etická komise<br>při Institutu klin. a<br>exp. Medicíny<br>Thomayerově FN<br>Videňská - 800<br>140 59 Praha - 4 | Dr. Vladimír Staněk           | 12.6.2002                                                      | 12.6.2002                         | 8.10.2003                      | 8.2.2006                       | 11.7.2007                      |
| 710 / Jaromir Musil                       | Etická komise FN<br>Motol<br>V Úvalu - 84<br>150 06 Praha - 5                                                   | Dr. Vratislav Šmelhaus        | 28.8.2002                                                      | 28.8.2002                         | 27.11.2003                     | 18.1.2006                      | 6.6.2007                       |
| 711 / Ivo Hojka                           | Etická komise FN<br>Motol<br>V Úvalu - 84<br>150 06 Praha - 5                                                   | Dr. Vratislav Šmelhaus        | 17.9.2002                                                      | 17.9.2002                         | 5.8.2003                       | 31.1.2006                      | 6.6.2007                       |
| 712 / Alena Havlikova                     | Etická komise<br>Nem. Rudolfa a<br>Stefanie                                                                     | Dr. Jiří Bráza                | 17.9.2002                                                      | 17.9.2002                         | 5.3.2003                       | 20.2.2006                      | 23.8.2007                      |



**Czechia**

| <b>Centre number(s) / Investigator(s)</b> | <b>IRB or IEC (name/address)</b>                                                                       | <b>IRB or IEC Chairperson</b> | <b>Informed Consent/Pt. Information Form Approval DD/MM/YY</b> | <b>Protocol Approval DD/MM/YY</b> | <b>Am. 1 Approval DD/MM/YY</b> | <b>Am. 2 Approval DD/MM/YY</b> | <b>Am. 3 Approval DD/MM/YY</b> |
|-------------------------------------------|--------------------------------------------------------------------------------------------------------|-------------------------------|----------------------------------------------------------------|-----------------------------------|--------------------------------|--------------------------------|--------------------------------|
|                                           | Máchova - 400<br>256 30, Benešov u Prahy                                                               |                               |                                                                |                                   |                                |                                |                                |
| 713 / Jaroslav Mares                      | Etická komise<br>Nemocnice<br>Strakonice<br>Radomyšlská - 336<br>386 29, Strakonice                    | Dr. Pavel Švihálek            | 11.6.2002                                                      | 11.6.2002                         | 2.12.2003                      | 7.3.2006                       | 14.8.2007                      |
| 714 / Kamil Klenha                        | Etická komise<br>Okresní Nemocnice<br>Tábor<br>Kpt. Jaroše - 2000<br>390 19, Tábor                     | Dr. Kamil Kleňha              | 20.6.2002                                                      | 20.6.2002                         | 26.6.2003                      | 7.2.2006                       | 12.9.2007                      |
| 715 / Vladimír Vondra                     | Etická komise SPLIN<br>s.r.o.<br>Nestátní zdravotnické<br>zařízení<br>Čimická - 37<br>182 00 Praha - 8 | Dr. Oldřich Koberec           | 9.10.2002                                                      | 9.10.2002                         | 29.7.2003                      | 20.3.2006                      | 8.8.2007                       |
| 716 / Milos Havlik                        | Etická komise<br>ECOLAB<br>Václavské Náměstí -<br>1<br>669 02 Znojmo                                   | Dr. Hulán Karel               | 16.10.2002                                                     | 16.10.2002                        | 10.8.2003                      | 27.3.2006                      | 25.6.2007                      |
| 717 / Zdenka Parakova                     | Etická komise<br>FN Hradec Králové<br>Sokolská 408<br>500 05 Hradec<br>Králové                         | Dr. Jiří Vortel               | 14.11.2002                                                     | 14.11.2002                        | 10.10.2003                     | 9.2.2006                       | 2.7.2007                       |
| 718 / Jiri Vlcek                          | Etická komise FN u<br>sv. Anny v Brně<br>Pekařská 53                                                   | Dr. Vladimír Soška            | 24.6.2002                                                      | 24.6.2002                         | 22.8.2003                      | 21.4.2006                      | 14.6.2007                      |

| Czechia                            |                                                                           |                        |                                                         |                            |                         |                         |                         |
|------------------------------------|---------------------------------------------------------------------------|------------------------|---------------------------------------------------------|----------------------------|-------------------------|-------------------------|-------------------------|
| Centre number(s) / Investigator(s) | IRB or IEC (name/address)                                                 | IRB or IEC Chairperson | Informed Consent/Pt. Information Form Approval DD/MM/YY | Protocol Approval DD/MM/YY | Am. 1 Approval DD/MM/YY | Am. 2 Approval DD/MM/YY | Am. 3 Approval DD/MM/YY |
|                                    | 656 91 Brno                                                               |                        |                                                         |                            |                         |                         |                         |
| 719 / Jana Dvorakova               | Etická komise<br>Čs. Armády 1076<br>562 18 Ústí nad<br>Orlicí             | Dr.Miroslav Karelš     | 8.7.2002                                                | 8.7.2002                   | 25.8.2003               | 1.2.2006                | 6.6.2007                |
| 720 / Helena Mazacova              | Etická komise<br>Nemocnice Polesí<br>Konská 453<br>739 61 Třinec          | Dr. Marian Branny      | 4.11.2002                                               | 4.11.2002                  | 25.8.2003               | 1.3.2006                | 27.9.2007               |
| 721 / Velart Dusan                 | Etická komise při<br>M.I.O. s.r.o.<br>K nemocnici 32<br>741 01 Nový Jičín | Dr.Jaromir Gumulec     | 6.10.2002                                               | 6.10.2002                  | 10.9.2003               | 6.4.2006                | 13.9.2007               |
| 722 / Ladislav Pospisil            | Etická komise<br>Havlíčková 660<br>767 55 Kroměříž                        | Dr.Lumír Domes         | 13.6.2002                                               | 13.6.2002                  | 12.9.2003               | 17.3.2006               | 12.7.2007               |
| 723 / Dr. Olga Zajicova            | Etická komise<br>FN a LF Olomouc<br>I.P. Pavlova 6<br>775 20 Olomouc      | Dr.Vladko Horčíčka     | 17.6.2002                                               | 17.6.2002                  | 18.8.2003               | 20.2.2006               | 18.6.2007               |
| 724 / Petr Kolman                  | Etická komise<br>Nemocnice Kyjov<br>Strážovská 976<br>697 33 Kyjov        | Dr.Luděk Šimeček       | 11.11.2002                                              | 11.11.2002                 | 25.8.2003               | 21.3.2006               | 8.8.2007                |
| 725 / Ilona Binková                | Etická komise<br>FN Brno Bohunice<br>Jihlavská 20<br>625 00 Brno          | Dr.Šárka Sedláčková    | 27.11.2002                                              | 27.11.2002                 | 11.9.2003               | 8.2.2006                | 20.6.2007               |

| <b>Czechia</b>                            |                                                                             |                               |                                                                |                                   |                                |                                |                                |
|-------------------------------------------|-----------------------------------------------------------------------------|-------------------------------|----------------------------------------------------------------|-----------------------------------|--------------------------------|--------------------------------|--------------------------------|
| <b>Centre number(s) / Investigator(s)</b> | <b>IRB or IEC (name/address)</b>                                            | <b>IRB or IEC Chairperson</b> | <b>Informed Consent/Pt. Information Form Approval DD/MM/YY</b> | <b>Protocol Approval DD/MM/YY</b> | <b>Am. 1 Approval DD/MM/YY</b> | <b>Am. 2 Approval DD/MM/YY</b> | <b>Am. 3 Approval DD/MM/YY</b> |
| 726 / Josef Fratrik                       | Etická komise<br>FN Hradec Králové<br>Sokolská 408<br>500 05 Hradec Králové | Dr. Jiří Vortel               | 14.11.2002                                                     | 14.11.2002                        | 10.10.2003                     | 9.2.2006                       | 2.7.2007                       |

| Denmark                            |                                                                                                                                                                                                                    |                        |                                                         |                            |                         |                                                                     |                         |
|------------------------------------|--------------------------------------------------------------------------------------------------------------------------------------------------------------------------------------------------------------------|------------------------|---------------------------------------------------------|----------------------------|-------------------------|---------------------------------------------------------------------|-------------------------|
| Centre number(s) / Investigator(s) | IRB or IEC (name/address)                                                                                                                                                                                          | IRB or IEC Chairperson | Informed Consent/Pt. Information Form Approval DD/MM/YY | Protocol Approval DD/MM/YY | Am. 1 Approval DD/MM/YY | Am. 2 Approval DD/MM/YY                                             | Am. 3 Approval DD/MM/YY |
| 801 / Peter Lange                  | Current address:<br>De Videnskabetiske<br>Komitéer for Region<br>Hovedstaden<br>Regionsgaarden<br>Kongens Vaenge 2<br>DK-3400 Hilleroed<br><br>Address on approval:<br>Sjællandsgade 40<br>DK-2200<br>Koebenhavn N | Jens Bülow             | 25-10-02                                                | 11-07-02                   | 12-08-03                | 21-07-07<br>(Approval<br>from the<br>Danish<br>Health<br>Authority) | 08-06-07                |
| 802 / Vibeke Backer                | Current address:<br>De Videnskabetiske<br>Komitéer for Region<br>Hovedstaden<br>Regionsgaarden<br>Kongens Vaenge 2<br>DK-3400 Hilleroed<br><br>Address on approval:<br>Sjællandsgade 40<br>DK-2200<br>Koebenhavn N | Jens Bülow             | 25-10-02                                                | 11-07-02                   | 12-08-03                | 21-07-07<br>(Approval<br>from the<br>Danish<br>Health<br>Authority) | 08-06-07                |
| 803 / Ronald Dahl                  | Current address:<br>De Videnskabetiske<br>Komitéer for Region<br>Hovedstaden<br>Regionsgaarden<br>Kongens Vaenge 2<br>DK-3400 Hilleroed                                                                            | Jens Bülow             | 25-10-02                                                | 11-07-02                   | 12-08-03                | 21-07-07<br>(Approval<br>from the<br>Danish<br>Health<br>Authority) | 08-06-07                |

| Denmark                            |                                                                                                                                                                                                                   |                        |                                                         |                            |                         |                                                         |                         |
|------------------------------------|-------------------------------------------------------------------------------------------------------------------------------------------------------------------------------------------------------------------|------------------------|---------------------------------------------------------|----------------------------|-------------------------|---------------------------------------------------------|-------------------------|
| Centre number(s) / Investigator(s) | IRB or IEC (name/address)                                                                                                                                                                                         | IRB or IEC Chairperson | Informed Consent/Pt. Information Form Approval DD/MM/YY | Protocol Approval DD/MM/YY | Am. 1 Approval DD/MM/YY | Am. 2 Approval DD/MM/YY                                 | Am. 3 Approval DD/MM/YY |
|                                    | Address on approval:<br>Sjællandsgade 40<br>DK-2200<br>København N                                                                                                                                                |                        |                                                         |                            |                         |                                                         |                         |
| 804 / Henrik Harving               | Current address:<br>De Videnskabetiske<br>Komitéer for Region<br>Hovedstaden<br>Regionsgaarden<br>Kongens Vaenge 2<br>DK-3400 Hilleroed<br><br>Address on approval:<br>Sjællandsgade 40<br>DK-2200<br>København N | Jens Bülow             | 25-10-02                                                | 11-07-02                   | 12-08-03                | 21-07-07<br>(Approval from the Danish Health Authority) | 08-06-07                |
| 805 / Phillip Tønnesen             | Current address:<br>De Videnskabetiske<br>Komitéer for Region<br>Hovedstaden<br>Regionsgaarden<br>Kongens Vaenge 2<br>DK-3400 Hilleroed<br><br>Address on approval:<br>Sjællandsgade 40<br>DK-2200<br>København N | Jens Bülow             | 25-10-02                                                | 11-07-02                   | 12-08-03                | 21-07-07<br>(Approval from the Danish Health Authority) | 08-06-07                |
| 806 / Erik Munch                   | Current address:<br>De Videnskabetiske<br>Komitéer for Region<br>Hovedstaden                                                                                                                                      | Jens Bülow             | 25-10-02                                                | 11-07-02                   | 12-08-03                | 21-07-07<br>(Approval from the Danish Health Authority) | 08-06-07                |

| Denmark                            |                                                                                                                                                                                                                       |                        |                                                         |                            |                         |                                                         |                         |
|------------------------------------|-----------------------------------------------------------------------------------------------------------------------------------------------------------------------------------------------------------------------|------------------------|---------------------------------------------------------|----------------------------|-------------------------|---------------------------------------------------------|-------------------------|
| Centre number(s) / Investigator(s) | IRB or IEC (name/address)                                                                                                                                                                                             | IRB or IEC Chairperson | Informed Consent/Pt. Information Form Approval DD/MM/YY | Protocol Approval DD/MM/YY | Am. 1 Approval DD/MM/YY | Am. 2 Approval DD/MM/YY                                 | Am. 3 Approval DD/MM/YY |
|                                    | Regionsgaarden<br>Kongens Vaenge 2<br>DK-3400 Hilleroed<br>Address on approval:<br>Sjaellandsgade 40<br>DK-2200<br>Koebenhavn N                                                                                       |                        |                                                         |                            |                         | Health Authority)                                       |                         |
| 807 / Ole Bruun Rasmussen          | Current address:<br>De Videnskabsetiske<br>Komitéeer for Region<br>Hovedstaden<br>Regionsgaarden<br>Kongens Vaenge 2<br>DK-3400 Hilleroed<br><br>Address on approval:<br>Sjaellandsgade 40<br>DK-2200<br>Koebenhavn N | Jens Bülow             | 25-10-02                                                | 11-07-02                   | 12-08-03                | 21-07-07<br>(Approval from the Danish Health Authority) | 08-06-07                |
| 808 / Flemming Egede               | Current address:<br>De Videnskabsetiske<br>Komitéeer for Region<br>Hovedstaden<br>Regionsgaarden<br>Kongens Vaenge 2<br>DK-3400 Hilleroed<br><br>Address on approval:<br>Sjaellandsgade 40<br>DK-2200<br>Koebenhavn N | Jens Bülow             | 25-10-02                                                | 11-07-02                   | 12-08-03                | 21-07-07<br>(Approval from the Danish Health Authority) | 08-06-07                |

| Denmark                            |                                                                                                                                                                                                                     |                        |                                                         |                            |                         |                                                                     |                         |
|------------------------------------|---------------------------------------------------------------------------------------------------------------------------------------------------------------------------------------------------------------------|------------------------|---------------------------------------------------------|----------------------------|-------------------------|---------------------------------------------------------------------|-------------------------|
| Centre number(s) / Investigator(s) | IRB or IEC (name/address)                                                                                                                                                                                           | IRB or IEC Chairperson | Informed Consent/Pt. Information Form Approval DD/MM/YY | Protocol Approval DD/MM/YY | Am. 1 Approval DD/MM/YY | Am. 2 Approval DD/MM/YY                                             | Am. 3 Approval DD/MM/YY |
| 809 / Niels Christian Hansen       | Current address:<br>De Videnskabsetiske<br>Komitéer for Region<br>Hovedstaden<br>Regionsgaarden<br>Kongens Vaenge 2<br>DK-3400 Hilleroed<br><br>Address on approval:<br>Sjællandsgade 40<br>DK-2200<br>Koebenhavn N | Jens Bülow             | 25-10-02                                                | 11-07-02                   | 12-08-03                | 21-07-07<br>(Approval<br>from the<br>Danish<br>Health<br>Authority) | 08-06-07                |
| 810 / Asbjørn Høegholm             | Current address:<br>De Videnskabsetiske<br>Komitéer for Region<br>Hovedstaden<br>Regionsgaarden<br>Kongens Vaenge 2<br>DK-3400 Hilleroed<br><br>Address on approval:<br>Sjællandsgade 40<br>DK-2200<br>Koebenhavn N | Jens Bülow             | 25-10-02                                                | 11-07-02                   | 12-08-03                | 21-07-07<br>(Approval<br>from the<br>Danish<br>Health<br>Authority) | 08-06-07                |
| 811 / Finn Vejlø Rasmussen         | Current address:<br>De Videnskabsetiske<br>Komitéer for Region<br>Hovedstaden<br>Regionsgaarden<br>Kongens Vaenge 2<br>DK-3400 Hilleroed                                                                            | Jens Bülow             | 25-10-02                                                | 11-07-02                   | 12-08-03                | 21-07-07<br>(Approval<br>from the<br>Danish<br>Health<br>Authority) | 08-06-07                |

| Denmark                            |                                                                                                                                                                                                                   |                        |                                                         |                            |                         |                                                         |                         |
|------------------------------------|-------------------------------------------------------------------------------------------------------------------------------------------------------------------------------------------------------------------|------------------------|---------------------------------------------------------|----------------------------|-------------------------|---------------------------------------------------------|-------------------------|
| Centre number(s) / Investigator(s) | IRB or IEC (name/address)                                                                                                                                                                                         | IRB or IEC Chairperson | Informed Consent/Pt. Information Form Approval DD/MM/YY | Protocol Approval DD/MM/YY | Am. 1 Approval DD/MM/YY | Am. 2 Approval DD/MM/YY                                 | Am. 3 Approval DD/MM/YY |
|                                    | Address on approval:<br>Sjællandsgade 40<br>DK-2200<br>København N                                                                                                                                                |                        |                                                         |                            |                         |                                                         |                         |
| 812 / Mogens Christensen           | Current address:<br>De Videnskabetiske<br>Komitéer for Region<br>Hovedstaden<br>Regionsgaarden<br>Kongens Vaenge 2<br>DK-3400 Hilleroed<br><br>Address on approval:<br>Sjællandsgade 40<br>DK-2200<br>København N | Jens Bülow             | 25-10-02                                                | 11-07-02                   | N/A<br>Center closed    | N/A<br>Center closed                                    | N/A<br>Center closed    |
| 813 / Kristen Stax Jakobsen        | Current address:<br>De Videnskabetiske<br>Komitéer for Region<br>Hovedstaden<br>Regionsgaarden<br>Kongens Vaenge 2<br>DK-3400 Hilleroed<br><br>Address on approval:<br>Sjællandsgade 40<br>DK-2200<br>København N | Jens Bülow             | 25-10-02                                                | 11-07-02                   | 12-08-03                | 21-07-07<br>(Approval from the Danish Health Authority) | 08-06-07                |
| 814 / Jost Wessels                 | Current address:<br>De Videnskabetiske<br>Komitéer for Region<br>Hovedstaden                                                                                                                                      | Jens Bülow             | 25-10-02                                                | 11-07-02                   | 12-08-03                | 21-07-07<br>(Approval from the Danish                   | 08-06-07                |



| Denmark                            |                                                                                                                                                                                                                      |                        |                                                         |                            |                         |                                                         |                         |
|------------------------------------|----------------------------------------------------------------------------------------------------------------------------------------------------------------------------------------------------------------------|------------------------|---------------------------------------------------------|----------------------------|-------------------------|---------------------------------------------------------|-------------------------|
| Centre number(s) / Investigator(s) | IRB or IEC (name/address)                                                                                                                                                                                            | IRB or IEC Chairperson | Informed Consent/Pt. Information Form Approval DD/MM/YY | Protocol Approval DD/MM/YY | Am. 1 Approval DD/MM/YY | Am. 2 Approval DD/MM/YY                                 | Am. 3 Approval DD/MM/YY |
|                                    | Regionsgaarden<br>Kongens Vaenge 2<br>DK-3400 Hilleroed<br><br>Address on approval:<br>Sjaellandsgade 40<br>DK-2200<br>Koebenhavn N                                                                                  |                        |                                                         |                            |                         | Health Authority)                                       |                         |
| 815 / Jens L. Frandsen             | Current address:<br>De Videnskabsetiske<br>Komiteer for Region<br>Hovedstaden<br>Regionsgaarden<br>Kongens Vaenge 2<br>DK-3400 Hilleroed<br><br>Address on approval:<br>Sjaellandsgade 40<br>DK-2200<br>Koebenhavn N | Jens Bülow             | 25-10-02                                                | 11-07-02                   | 12-08-03                | 21-07-07<br>(Approval from the Danish Health Authority) | 08-06-07                |
| 816 / Torben Evald                 | Current address:<br>De Videnskabsetiske<br>Komiteer for Region<br>Hovedstaden<br>Regionsgaarden<br>Kongens Vaenge 2<br>DK-3400 Hilleroed<br><br>Address on approval:<br>Sjaellandsgade 40<br>DK-2200<br>Koebenhavn N | Jens Bülow             | 25-10-02                                                | 11-07-02                   | 12-08-03                | 21-07-07<br>(Approval from the Danish Health Authority) | 08-06-07                |

| Denmark                            |                                                                                                                                                                                                                     |                        |                                                         |                            |                         |                                                                     |                         |
|------------------------------------|---------------------------------------------------------------------------------------------------------------------------------------------------------------------------------------------------------------------|------------------------|---------------------------------------------------------|----------------------------|-------------------------|---------------------------------------------------------------------|-------------------------|
| Centre number(s) / Investigator(s) | IRB or IEC (name/address)                                                                                                                                                                                           | IRB or IEC Chairperson | Informed Consent/Pt. Information Form Approval DD/MM/YY | Protocol Approval DD/MM/YY | Am. 1 Approval DD/MM/YY | Am. 2 Approval DD/MM/YY                                             | Am. 3 Approval DD/MM/YY |
| 819 / Johnna Steentoft             | Current address:<br>De Videnskabsetiske<br>Komitéer for Region<br>Hovedstaden<br>Regionsgaarden<br>Kongens Vaenge 2<br>DK-3400 Hilleroed<br><br>Address on approval:<br>Sjællandsgade 40<br>DK-2200<br>Koebenhavn N | Jens Bülow             | 25-10-02                                                | 11-07-02                   | 12-08-03                | 21-07-07<br>(Approval<br>from the<br>Danish<br>Health<br>Authority) | 08-06-07                |
| 820 / Per Garsdal                  | Current address:<br>De Videnskabsetiske<br>Komitéer for Region<br>Hovedstaden<br>Regionsgaarden<br>Kongens Vaenge 2<br>DK-3400 Hilleroed<br><br>Address on approval:<br>Sjællandsgade 40<br>DK-2200<br>Koebenhavn N | Jens Bülow             | 25-10-02                                                | 11-07-02                   | 12-08-03                | N/A<br>Center<br>Closed                                             | N/A<br>Center<br>Closed |
| 821 / Carl Nielsen                 | Current address:<br>De Videnskabsetiske<br>Komitéer for Region<br>Hovedstaden<br>Regionsgaarden<br>Kongens Vaenge 2<br>DK-3400 Hilleroed                                                                            | Jens Bülow             | 25-10-02                                                | 11-07-02                   | 12-08-03                | 21-07-07<br>(Approval<br>from the<br>Danish<br>Health<br>Authority) | 08-06-07                |

| Denmark                            |                                                                                                                                                                                                                  |                        |                                                         |                            |                         |                                                         |                         |
|------------------------------------|------------------------------------------------------------------------------------------------------------------------------------------------------------------------------------------------------------------|------------------------|---------------------------------------------------------|----------------------------|-------------------------|---------------------------------------------------------|-------------------------|
| Centre number(s) / Investigator(s) | IRB or IEC (name/address)                                                                                                                                                                                        | IRB or IEC Chairperson | Informed Consent/Pt. Information Form Approval DD/MM/YY | Protocol Approval DD/MM/YY | Am. 1 Approval DD/MM/YY | Am. 2 Approval DD/MM/YY                                 | Am. 3 Approval DD/MM/YY |
|                                    | Address on approval:<br>Sjællandsgade 40<br>DK-2200<br>København N                                                                                                                                               |                        |                                                         |                            |                         |                                                         |                         |
| 822 / Svend Haahr                  | Current address:<br>De Videnskabetiske<br>Komitée for Region<br>Hovedstaden<br>Regionsgaarden<br>Kongens Vaenge 2<br>DK-3400 Hilleroed<br><br>Address on approval:<br>Sjællandsgade 40<br>DK-2200<br>København N | Jens Bülow             | 25-10-02                                                | 11-07-02                   | 12-08-03                | 21-07-07<br>(Approval from the Danish Health Authority) | 08-06-07                |
| 824 / Povl Arne Revsbech           | Current address:<br>De Videnskabetiske<br>Komitée for Region<br>Hovedstaden<br>Regionsgaarden<br>Kongens Vaenge 2<br>DK-3400 Hilleroed<br><br>Address on approval:<br>Sjællandsgade 40<br>DK-2200<br>København N | Jens Bülow             | 25-10-02                                                | 11-07-02                   | 12-08-03                | 21-07-07<br>(Approval from the Danish Health Authority) | 08-06-07                |
| 826 / Jens Georg Hansen            | Current address:<br>De Videnskabetiske<br>Komitée for Region<br>Hovedstaden                                                                                                                                      | Jens Bülow             | 25-10-02                                                | 11-07-02                   | 12-08-03                | 21-07-07<br>(Approval from the Danish Health Authority) | 08-06-07                |

| Denmark                            |                                                                                                                                                                                                                      |                        |                                                         |                            |                         |                                                         |                         |
|------------------------------------|----------------------------------------------------------------------------------------------------------------------------------------------------------------------------------------------------------------------|------------------------|---------------------------------------------------------|----------------------------|-------------------------|---------------------------------------------------------|-------------------------|
| Centre number(s) / Investigator(s) | IRB or IEC (name/address)                                                                                                                                                                                            | IRB or IEC Chairperson | Informed Consent/Pt. Information Form Approval DD/MM/YY | Protocol Approval DD/MM/YY | Am. 1 Approval DD/MM/YY | Am. 2 Approval DD/MM/YY                                 | Am. 3 Approval DD/MM/YY |
|                                    | Regionsgaarden<br>Kongens Vaenge 2<br>DK-3400 Hilleroed<br><br>Address on approval:<br>Sjaellandsgade 40<br>DK-2200<br>Koebenhavn N                                                                                  |                        |                                                         |                            |                         | Health Authority)                                       |                         |
| 827 / Torben Soerensen             | Current address:<br>De Videnskabsetiske<br>Komiteer for Region<br>Hovedstaden<br>Regionsgaarden<br>Kongens Vaenge 2<br>DK-3400 Hilleroed<br><br>Address on approval:<br>Sjaellandsgade 40<br>DK-2200<br>Koebenhavn N | Jens Bülow             | 25-10-02                                                | 11-07-02                   | 12-08-03                | 21-07-07<br>(Approval from the Danish Health Authority) | 08-06-07                |
| 828 / John Rützou Arnved           | Current address:<br>De Videnskabsetiske<br>Komiteer for Region<br>Hovedstaden<br>Regionsgaarden<br>Kongens Vaenge 2<br>DK-3400 Hilleroed<br><br>Address on approval:<br>Sjaellandsgade 40<br>DK-2200<br>Koebenhavn N | Jens Bülow             | 25-10-02                                                | 11-07-02                   | 12-08-03                | 21-07-07<br>(Approval from the Danish Health Authority) | 08-06-07                |

| Denmark                            |                                                                                                                                                                                                                     |                        |                                                         |                            |                         |                                                                     |                         |
|------------------------------------|---------------------------------------------------------------------------------------------------------------------------------------------------------------------------------------------------------------------|------------------------|---------------------------------------------------------|----------------------------|-------------------------|---------------------------------------------------------------------|-------------------------|
| Centre number(s) / Investigator(s) | IRB or IEC (name/address)                                                                                                                                                                                           | IRB or IEC Chairperson | Informed Consent/Pt. Information Form Approval DD/MM/YY | Protocol Approval DD/MM/YY | Am. 1 Approval DD/MM/YY | Am. 2 Approval DD/MM/YY                                             | Am. 3 Approval DD/MM/YY |
| 830 / Axel MØller                  | Current address:<br>De Videnskabsetiske<br>Komitéer for Region<br>Hovedstaden<br>Regionsgaarden<br>Kongens Vaenge 2<br>DK-3400 Hilleroed<br><br>Address on approval:<br>Sjællandsgade 40<br>DK-2200<br>Koebenhavn N | Jens Bülow             | 25-10-02                                                | 11-07-02                   | 12-08-03                | 21-07-07<br>(Approval<br>from the<br>Danish<br>Health<br>Authority) | 08-06-07                |
| 831 / Henriette Enevoldsen         | Current address:<br>De Videnskabsetiske<br>Komitéer for Region<br>Hovedstaden<br>Regionsgaarden<br>Kongens Vaenge 2<br>DK-3400 Hilleroed<br>Address on approval:<br>Sjællandsgade 40<br>DK-2200<br>Koebenhavn N     | Jens Bülow             | 25-10-02                                                | 11-07-02                   | 12-08-03                | 21-07-07<br>(Approval<br>from the<br>Danish<br>Health<br>Authority) | 08-06-07                |
| 832 / Martin DØssing               | Current address:<br>De Videnskabsetiske<br>Komitéer for Region<br>Hovedstaden<br>Regionsgaarden<br>Kongens Vaenge 2<br>DK-3400 Hilleroed<br>Address on approval:<br>Sjællandsgade 40                                | Jens Bülow             | 25-10-02                                                | 11-07-02                   | 12-08-03                | 21-07-07<br>(Approval<br>from the<br>Danish<br>Health<br>Authority) | 08-06-07                |

| Denmark                            |                                                                                                                                                                                                                   |                        |                                                         |                            |                         |                                                                     |                         |
|------------------------------------|-------------------------------------------------------------------------------------------------------------------------------------------------------------------------------------------------------------------|------------------------|---------------------------------------------------------|----------------------------|-------------------------|---------------------------------------------------------------------|-------------------------|
| Centre number(s) / Investigator(s) | IRB or IEC (name/address)                                                                                                                                                                                         | IRB or IEC Chairperson | Informed Consent/Pt. Information Form Approval DD/MM/YY | Protocol Approval DD/MM/YY | Am. 1 Approval DD/MM/YY | Am. 2 Approval DD/MM/YY                                             | Am. 3 Approval DD/MM/YY |
|                                    | DK-2200<br>Koebenhavn N                                                                                                                                                                                           |                        |                                                         |                            |                         |                                                                     |                         |
| 833 / Peter Christensen            | Current address:<br>De Videnskabsetiske<br>Komitéeer for Region<br>Hovedstaden<br>Regionsgaarden<br>Kongens Vaenge 2<br>DK-3400 Hilleroed<br>Address on approval:<br>Sjaellandsgade 40<br>DK-2200<br>Koebenhavn N | Jens Bülow             | 25-10-02                                                | 11-07-02                   | 12-08-03                | 21-07-07<br>(Approval<br>from the<br>Danish<br>Health<br>Authority) | 08-06-07                |
| 834 / Kent Dencker Christensen     | Current address:<br>De Videnskabsetiske<br>Komitéeer for Region<br>Hovedstaden<br>Regionsgaarden<br>Kongens Vaenge 2<br>DK-3400 Hilleroed<br>Address on approval:<br>Sjaellandsgade 40<br>DK-2200<br>Koebenhavn N | Jens Bülow             | 25-10-02                                                | 11-07-02                   | 12-08-03                | 21-07-07<br>(Approval<br>from the<br>Danish<br>Health<br>Authority) | 08-06-07                |
| 835 / Lars Frølund                 | Current address:<br>De Videnskabsetiske<br>Komitéeer for Region<br>Hovedstaden<br>Regionsgaarden<br>Kongens Vaenge 2<br>DK-3400 Hilleroed                                                                         | Jens Bülow             | 25-10-02                                                | 11-07-02                   | 12-08-03                | 21-07-07<br>(Approval<br>from the<br>Danish<br>Health<br>Authority) | 08-06-07                |

| Denmark                                   |                                                                      |                               |                                                                |                                   |                                |                                |                                |
|-------------------------------------------|----------------------------------------------------------------------|-------------------------------|----------------------------------------------------------------|-----------------------------------|--------------------------------|--------------------------------|--------------------------------|
| <b>Centre number(s) / Investigator(s)</b> | <b>IRB or IEC (name/address)</b>                                     | <b>IRB or IEC Chairperson</b> | <b>Informed Consent/Pt. Information Form Approval DD/MM/YY</b> | <b>Protocol Approval DD/MM/YY</b> | <b>Am. 1 Approval DD/MM/YY</b> | <b>Am. 2 Approval DD/MM/YY</b> | <b>Am. 3 Approval DD/MM/YY</b> |
|                                           | Address on approval:<br>Sjaellandsgade 40<br>DK-2200<br>Koebenhavn N |                               |                                                                |                                   |                                |                                |                                |

| Finland                            |                                                                   |                                                   |                                                         |                            |                         |                         |                         |
|------------------------------------|-------------------------------------------------------------------|---------------------------------------------------|---------------------------------------------------------|----------------------------|-------------------------|-------------------------|-------------------------|
| Centre number(s) / Investigator(s) | IRB or IEC (name/address)                                         | IRB or IEC Chairperson                            | Informed Consent/Pt. Information Form Approval DD/MM/YY | Protocol Approval DD/MM/YY | Am. 1 Approval DD/MM/YY | Am. 2 Approval DD/MM/YY | Am. 3 Approval DD/MM/YY |
| 901 / Kari Venho                   | Keski-Suomen Sairaanhoidopiiri, Eettinen toimikunta               | Vuokko Rauhala<br>Jukka Puolakka<br>Raisa Lounama | 06/08/02                                                | 20/10/02                   | -                       | 01/03/06                | 28/05/07                |
| 902 / Matti Pietiläinen            |                                                                   |                                                   |                                                         | 20/10/02                   | -                       | 06/03/06                | 22/05/07                |
| 903 / Pekka Saarelainen            | Keski-Suomen Sairaanhoidopiiri, Eettinen toimikunta               | Raisa Lounama                                     | 21/05/02                                                | 20/10/02                   | -                       | 03/03/06                | 28/06/07                |
| 904 / Jyrki Kotaniemi              | Päijät-Hämeen sairaanhoidopiirin kuntayhtymä, Eettinen toimikunta | Markku Luostarinen                                | 20/11/02                                                | 28/10/02                   | -                       | 06/03/06                | 25/05/07                |
| 905 / Jussi Männistö               | Kymenlaakson sairaanhoidopiirin Eettinen toimikunta               | Jaakko Johansson                                  | 18/11/02                                                | 29/10/02                   | -                       | 03/03/06                | 25/05/07                |



| France                             |                                                                                                             |                         |                                                         |                            |                         |                         |                         |
|------------------------------------|-------------------------------------------------------------------------------------------------------------|-------------------------|---------------------------------------------------------|----------------------------|-------------------------|-------------------------|-------------------------|
| Centre number(s) / Investigator(s) | IRB or IEC (name/address)                                                                                   | IRB or IEC Chairperson  | Informed Consent/Pt. Information Form Approval DD/MM/YY | Protocol Approval DD/MM/YY | Am. 1 Approval DD/MM/YY | Am. 2 Approval DD/MM/YY | Am. 3 Approval DD/MM/YY |
| 1001 / Michel Aubier               | C.P.P. Ile de France I<br>Hôpital Hôtel Dieu<br>1, place du Parvis<br>Notre-Dame<br>75181 PARIS Cedex<br>04 | Docteur Elisabeth FRIJA | 30/04/02                                                | 30/04/02                   | 04/08/03                | 12/12/05                | 20/08/07                |
| 1002 / Bernard Pigearias           | same                                                                                                        | Docteur Elisabeth FRIJA | 30/04/02                                                | 30/04/2002                 | 04/08/03                | 12/12/05                | 20/08/07                |
| 1004 / François Malaquin           | same                                                                                                        | Docteur Elisabeth FRIJA | 30/04/02                                                | 30/04/02                   | 04/08/03                | 12/12/05                | 20/08/07                |
| 1005 / Noël Grunhec                | same                                                                                                        | Docteur Elisabeth FRIJA | 30/04/02                                                | 30/04/02                   | 04/08/03                | 12/12/05                | 20/08/07                |
| 1006 / Lucien Bernabeu             | same                                                                                                        | Docteur Elisabeth FRIJA | 30/04/02                                                | 30/04/02                   | 04/08/03                | 12/12/05                | 20/08/07                |
| 1007 / Bernard Carme               | same                                                                                                        | Docteur Elisabeth FRIJA | 30/04/02                                                | 30/04/02                   | 04/08/03                | 12/12/05                | 20/08/07                |
| 1009 / Anne Prudhomme              | same                                                                                                        | Docteur Elisabeth FRIJA | 30/04/02                                                | 30/04/02                   | 04/08/03                | 12/12/05                | 20/08/07                |
| 1012 / François Bonte              | same                                                                                                        | Docteur Elisabeth FRIJA | 30/04/02                                                | 30/04/02                   | 04/08/03                | 12/12/05                | 20/08/07                |
| 1013 / Dominique Boz               | same                                                                                                        | Docteur Elisabeth FRIJA | 30/04/02                                                | 30/04/02                   | 04/08/03                | 12/12/05                | 20/08/07                |

| France                             |                           |                         |                                                         |                            |                         |                         |                         |
|------------------------------------|---------------------------|-------------------------|---------------------------------------------------------|----------------------------|-------------------------|-------------------------|-------------------------|
| Centre number(s) / Investigator(s) | IRB or IEC (name/address) | IRB or IEC Chairperson  | Informed Consent/Pt. Information Form Approval DD/MM/YY | Protocol Approval DD/MM/YY | Am. 1 Approval DD/MM/YY | Am. 2 Approval DD/MM/YY | Am. 3 Approval DD/MM/YY |
| 1015 / Richard Meunier             | same                      | Docteur Elisabeth FRIJA | 30/04/02                                                | 30/04/02                   | 04/08/03                | 12/12/05                | 20/08/07                |
| 1016 / Marie-Thérèse Rasolojaona   | same                      | Docteur Elisabeth FRIJA | 30/04/02                                                | 30/04/02                   | 04/08/03                | 12/12/05                | 20/08/07                |
| 1019 / Michel Apprill              | same                      | Docteur Elisabeth FRIJA | 30/04/02                                                | 30/04/02                   | 04/08/03                | 12/12/05                | 20/08/07                |
| 1020 / Roland Fargeon              | same                      | Docteur Elisabeth FRIJA | 30/04/02                                                | 30/04/02                   | 04/08/03                | 12/12/05                | 20/08/07                |
| 1021 / Patrick Bernard             | same                      | Docteur Elisabeth FRIJA | 30/04/02                                                | 30/04/02                   | 04/08/03                | 12/12/05                | 20/08/07                |
| 1023 / François Tirouvanziam       | same                      | Docteur Elisabeth FRIJA | 30/04/02                                                | 30/04/02                   | 04/08/03                | 12/12/05                | 20/08/07                |
| 1024 / Marc Legendre               | same                      | Docteur Elisabeth FRIJA | 30/04/02                                                | 30/04/02                   | 04/08/03                | 12/12/05                | 20/08/07                |
| 1025 / Jean-Yves Jasnot            | same                      | Docteur Elisabeth FRIJA | 30/04/02                                                | 30/04/02                   | 04/08/03                | 12/12/05                | 20/08/07                |

| Germany                            |                                                                                           |                        |                                                         |                            |                                                  |                                                  |                                                           |
|------------------------------------|-------------------------------------------------------------------------------------------|------------------------|---------------------------------------------------------|----------------------------|--------------------------------------------------|--------------------------------------------------|-----------------------------------------------------------|
| Centre number(s) / Investigator(s) | IRB or IEC (name/address)                                                                 | IRB or IEC Chairperson | Informed Consent/Pt. Information Form Approval DD/MM/YY | Protocol Approval DD/MM/YY | Am. 1 Approval DD/MM/YY                          | Am. 2 Approval DD/MM/YY                          | Am. 3 Approval DD/MM/YY                                   |
| 1101 / Michael Barczok             | Landesaerztekammer Baden-Wuerttemberg Jahnstrasse 40 70597 Stuttgart                      | PD Dr. med. R. Zwirner | 08/04/02<br>06/06/02<br>22/07/02                        | 08/04/02                   | 04/07/03                                         | 21/01/06                                         | 11/05/07 (notice)                                         |
| 1102 / Jens Becker                 | Ethikkommission der Aerztekammer Schleswig-Holstein Bismarckallee 8-12 23795 Bad Segeberg |                        | same                                                    | 09/09/02                   | 04/07/03 (Landesaerztekammer Baden-Wuerttemberg) | 21/01/06 (Landesaerztekammer Baden-Wuerttemberg) | 11/05/07 (notice) (Landesaerztekammer Baden-Wuerttemberg) |
| 1103 / Mark Pilz                   | Aerztekammer Niedersachsen Berliner Allee 20 30175 Hannover                               |                        | same                                                    | 10/09/02                   | 04/07/03 (Landesaerztekammer Baden-Wuerttemberg) | 21/01/06 (Landesaerztekammer Baden-Wuerttemberg) | 11/05/07 (notice)(Landesaerztekammer Baden-Wuerttemberg)  |
| 1104 / Vera Grimm-Sachs            | Landesaerztekammer Baden-Wuerttemberg Jahnstrasse 40 70597 Stuttgart                      | PD Dr. med. R. Zwirner | 08/04/02<br>06/06/02<br>22/07/02                        | 08/04/02                   | 04/07/03                                         | 21/01/06                                         | 11/05/07 (notice)                                         |
| 1105 / Martin Jahn                 | Aerztekammer Niedersachsen Berliner Allee 20 30175 Hannover                               |                        | same                                                    | 10/09/02                   | 04/07/03 (Landesaerztekammer Baden-Wuerttemberg) | 21/01/06 (Landesaerztekammer Baden-Wuerttemberg) | 11/05/07 (notice) (Landesaerztekammer Baden-Wuerttemberg) |
| 1106 / Bernd Kemmerich             | Bayerische Landesaerztekammer Muehlbaurstrasse 16 81677 Muenchen                          |                        | same                                                    | 27/08/02                   | 04/07/03 (Landesaerztekammer Baden-Wuerttemberg) | 21/01/06 (Landesaerztekammer Baden-Wuerttemberg) | 11/05/07 (notice) (Landesaerztekammer Baden-Wuerttemberg) |

| Germany                            |                                                                      |                        |                                                         |                            |                                                  |                                                  |                                                           |
|------------------------------------|----------------------------------------------------------------------|------------------------|---------------------------------------------------------|----------------------------|--------------------------------------------------|--------------------------------------------------|-----------------------------------------------------------|
| Centre number(s) / Investigator(s) | IRB or IEC (name/address)                                            | IRB or IEC Chairperson | Informed Consent/Pt. Information Form Approval DD/MM/YY | Protocol Approval DD/MM/YY | Am. 1 Approval DD/MM/YY                          | Am. 2 Approval DD/MM/YY                          | Am. 3 Approval DD/MM/YY                                   |
| 1107 / Walter Vorderstrasse        | Aerztekammer Niedersachsen Berliner Allee 20 30175 Hannover          |                        | same                                                    | 10/09/02                   | 04/07/03 (Landesaerztekammer Baden-Wuerttemberg) | 21/01/06 (Landesaerztekammer Baden-Wuerttemberg) | 11/05/07 (notice) (Landesaerztekammer Baden-Wuerttemberg) |
| 1108 / Gerhard Klein               | Landesaerztekammer Baden-Wuerttemberg Jahnstrasse 40 70597 Stuttgart | PD Dr. med. R. Zwirner | 08/04/02<br>06/06/02<br>22/07/02                        | 08/04/02                   | 04/07/03                                         | 21/01/06                                         | 11/05/07 (notice)                                         |
| 1109 / Bernd Kroemer               | Bayerische Landesaerztekammer Muehlbaurstrasse 16 81677 Muenchen     |                        | same                                                    | 27/08/02                   | 04/07/03 (Landesaerztekammer Baden-Wuerttemberg) | 21/01/06 (Landesaerztekammer Baden-Wuerttemberg) | 11/05/07 (notice)(Landesaerztekammer Baden-Wuerttemberg)  |
| 1110 / Joachim Lehnert             | Bayerische Landesaerztekammer Muehlbaurstrasse 16 81677 Muenchen     |                        | same                                                    | 27/08/02                   | 04/07/03 (Landesaerztekammer Baden-Wuerttemberg) | 21/01/06 (Landesaerztekammer Baden-Wuerttemberg) | 11/05/07 (notice) (Landesaerztekammer Baden-Wuerttemberg) |
| 1112 / Ronald Redlich              | Landesaerztekammer Baden-Wuerttemberg Jahnstrasse 40 70597 Stuttgart | PD Dr. med. R. Zwirner | 08/04/02<br>06/06/02<br>22/07/02                        | 08/04/02                   | 04/07/03                                         | 21/01/06                                         | 11/05/07 (notice)                                         |
| 1113 / Soeren Schmidtman           | Aerztekammer Berlin Flottenstrasse 28-42 13407 Berlin                |                        | same                                                    | 20/08/02                   | 04/07/03 (Landesaerztekammer Baden-Wuerttemberg) | 21/01/06 (Landesaerztekammer Baden-Wuerttemberg) | 11/05/07 (notice) (Landesaerztekammer Baden-Wuerttemberg) |

| Germany                            |                                                                   |                        |                                                         |                            |                                                     |                                                     |                                                                 |
|------------------------------------|-------------------------------------------------------------------|------------------------|---------------------------------------------------------|----------------------------|-----------------------------------------------------|-----------------------------------------------------|-----------------------------------------------------------------|
| Centre number(s) / Investigator(s) | IRB or IEC (name/address)                                         | IRB or IEC Chairperson | Informed Consent/Pt. Information Form Approval DD/MM/YY | Protocol Approval DD/MM/YY | Am. 1 Approval DD/MM/YY                             | Am. 2 Approval DD/MM/YY                             | Am. 3 Approval DD/MM/YY                                         |
| 1114 / Thomas Schultz              | Ärztchammer Berlin<br>Flottenstrasse 28-42<br>13407 Berlin        |                        | ame                                                     | 20/08/02                   | 04/07/03<br>(Landesaerztchammer Baden-Wuerttemberg) | 21/01/06<br>(Landesaerztchammer Baden-Wuerttemberg) | 11/05/07<br>(notice)<br>(Landesaerztchammer Baden-Wuerttemberg) |
| 1115 / Hans-Henning Weber          | Aerztchammer Niedersachsen<br>Berliner Allee 20<br>30175 Hannover |                        | same                                                    | 10/09/02                   | 04/07/03<br>(Landesaerztchammer Baden-Wuerttemberg) | 21/01/06<br>(Landesaerztchammer Baden-Wuerttemberg) | 11/05/07<br>(notice)<br>(Landesaerztchammer Baden-Wuerttemberg) |

| Greece                             |                                                                                 |                        |                                                         |                            |                           |                         |                         |
|------------------------------------|---------------------------------------------------------------------------------|------------------------|---------------------------------------------------------|----------------------------|---------------------------|-------------------------|-------------------------|
| Centre number(s) / Investigator(s) | IRB or IEC (name/address)                                                       | IRB or IEC Chairperson | Informed Consent/Pt. Information Form Approval DD/MM/YY | Protocol Approval DD/MM/YY | Am. 1 Approval DD/MM/YY   | Am. 2 Approval DD/MM/YY | Am. 3 Approval DD/MM/YY |
| 1201 / Nicolaos Siafakas           | National Organization of Medicines/<br>Mesogeion Avenue<br>284, 155 62 Xolargos | M. Marselos            | Same as the protocol                                    | 17/JUN/02                  | Not applicable for Greece | 21/AUG/06               | 14/SEP/07               |
| 1202 / Ourania Anagnostopoulou     | National Organization of Medicines/<br>Mesogeion Avenue<br>284, 155 62 Xolargos | M. Marselos            | Same as the protocol                                    | 17/JUN/02                  | Not applicable for Greece | 21/AUG/06               | 14/SEP/07               |
| 1203 / Michail Toubis              | National Organization of Medicines/<br>Mesogeion Avenue<br>284, 155 62 Xolargos | M. Marselos            | Same as the protocol                                    | 17/JUN/02                  | Not applicable for Greece | 21/AUG/06               | 14/SEP/07               |
| 1204 / Konstantinos Gourgoulianis  | National Organization of Medicines/<br>Mesogeion Avenue<br>284, 155 62 Xolargos | M. Marselos            | Same as the protocol                                    | 17/JUN/02                  | Not applicable for Greece | 16/OCT/07               | 14/SEP/07               |
| 1205 / Lazaros Sichletides         | National Organization of Medicines/<br>Mesogeion Avenue<br>284, 155 62 Xolargos | M. Marselos            | Same as the protocol                                    | 17/JUN/02                  | Not applicable for Greece | 21/AUG/06               | 14/SEP/07               |
| 1206 / Marianna Kakoura            | National Organization of Medicines/<br>Mesogeion Avenue<br>284, 155 62 Xolargos | M. Marselos            | Same as the protocol                                    | 17/JUN/02                  | Not applicable for Greece | 21/AUG/06               | 14/SEP/07               |
| 1207 / Pandora Christaki           | National Organization of Medicines/<br>Mesogeion Avenue<br>284, 155 62 Xolargos | M. Marselos            | Same as the protocol                                    | 17/JUN/02                  | Not applicable for Greece | 21/AUG/06               | 14/SEP/07               |
| 1209 / Ioannis Lychros             | National Organization of Medicines/<br>Mesogeion Avenue<br>284, 155 62 Xolargos | M. Marselos            | Same as the protocol                                    | 17/JUN/02                  | Not applicable for Greece | 21/AUG/06               | 14/SEP/07               |

| Greece                             |                                                                                 |                        |                                                         |                            |                           |                         |                         |
|------------------------------------|---------------------------------------------------------------------------------|------------------------|---------------------------------------------------------|----------------------------|---------------------------|-------------------------|-------------------------|
| Centre number(s) / Investigator(s) | IRB or IEC (name/address)                                                       | IRB or IEC Chairperson | Informed Consent/Pt. Information Form Approval DD/MM/YY | Protocol Approval DD/MM/YY | Am. 1 Approval DD/MM/YY   | Am. 2 Approval DD/MM/YY | Am. 3 Approval DD/MM/YY |
| 1210 / Konstantinos Spiropoulos    | National Organization of Medicines/<br>Mesogeion Avenue<br>284, 155 62 Xolargos | M. Marselos            | Same as the protocol                                    | 17/JUN/02                  | Not applicable for Greece | 21/AUG/06               | 14/SEP/07               |
| 1211 / Stavroula Bousmoukilia      | National Organization of Medicines/<br>Mesogeion Avenue<br>284, 155 62 Xolargos | M. Marselos            | Same as the protocol                                    | 17/JUN/02                  | Not applicable for Greece | 21/AUG/06               | 14/SEP/07               |

| Greece                             |                                                                                                                                                                                                                     |                        |                                                                                                                                                                                                                                                                                                                                                      |                            |                         |                         |                         |
|------------------------------------|---------------------------------------------------------------------------------------------------------------------------------------------------------------------------------------------------------------------|------------------------|------------------------------------------------------------------------------------------------------------------------------------------------------------------------------------------------------------------------------------------------------------------------------------------------------------------------------------------------------|----------------------------|-------------------------|-------------------------|-------------------------|
| Centre number(s) / Investigator(s) | IRB or IEC (name/address)                                                                                                                                                                                           | IRB or IEC Chairperson | Informed Consent/Pt. Information Form Approval DD/MM/YY                                                                                                                                                                                                                                                                                              | Protocol Approval DD/MM/YY | Am. 1 Approval DD/MM/YY | Am. 2 Approval DD/MM/YY | Am. 3 Approval DD/MM/YY |
| Centre number(s) / Investigator(s) | IRB or IEC (name/address)                                                                                                                                                                                           | IRB or IEC Chairperson | Informed Consent/Pt. Information Form Approval DD/MM/YY                                                                                                                                                                                                                                                                                              | Protocol Approval DD/MM/YY | Am. 1 Approval DD/MM/YY | Am. 2 Approval DD/MM/YY | Am. 3 Approval DD/MM/YY |
| 1401 / David S C Hui               | <p>Joint The Chinese University of Hong Kong – New Territories East Cluster Clinical Research Ethics Committee</p> <p>Address: Flat 3C, Blk B, Staff Quarter, Prince of Wales Hospital, Shatin, N.T., Hong Kong</p> | Prof. Joseph Lau       | <p>Patient Information and Written Informed Consent Form, English Ver, HK No.1 dated 26Mar2002<br/>Approval date 24/06/02</p> <p>Patient Information and Written Informed Consent Form, Chinese Ver, HK No.1 dated 15Apr2002<br/>Approval date 24/06/02</p> <p>Patient Information and Written Informed Consent Form, English Ver, HK No.2 dated</p> | 24/06/02                   | NA                      | 09/05/06                | 08/06/07                |



| Greece                             |                           |                        |                                                                                                                                                                                                                                                                                                                                                                                                                                                 |                            |                         |                         |                         |
|------------------------------------|---------------------------|------------------------|-------------------------------------------------------------------------------------------------------------------------------------------------------------------------------------------------------------------------------------------------------------------------------------------------------------------------------------------------------------------------------------------------------------------------------------------------|----------------------------|-------------------------|-------------------------|-------------------------|
| Centre number(s) / Investigator(s) | IRB or IEC (name/address) | IRB or IEC Chairperson | Informed Consent/Pt. Information Form Approval DD/MM/YY                                                                                                                                                                                                                                                                                                                                                                                         | Protocol Approval DD/MM/YY | Am. 1 Approval DD/MM/YY | Am. 2 Approval DD/MM/YY | Am. 3 Approval DD/MM/YY |
|                                    |                           |                        | <p>3Dec2004<br/>Approval date<br/>04/01/05</p> <p>Patient Information and Written Informed Consent Form, Chinese Ver, HK No.2 dated 3Dec2004<br/>Approval date<br/>04/01/05</p> <p>Supplemental Informed Consent – Long Term Follow up, English Ver 1.0, dated 30Nov2005<br/>Approval date<br/>09/05/06</p> <p>Supplemental Informed Consent – Long Term Follow up, Chinese Chinese Ver 1.0, dated 28Mar2006<br/>Approval date<br/>09/05/06</p> |                            |                         |                         |                         |

| Greece                             |                           |                        |                                                                                                                                                                                                                                                                                                                                                                                                                   |                            |                         |                         |                         |
|------------------------------------|---------------------------|------------------------|-------------------------------------------------------------------------------------------------------------------------------------------------------------------------------------------------------------------------------------------------------------------------------------------------------------------------------------------------------------------------------------------------------------------|----------------------------|-------------------------|-------------------------|-------------------------|
| Centre number(s) / Investigator(s) | IRB or IEC (name/address) | IRB or IEC Chairperson | Informed Consent/Pt. Information Form Approval DD/MM/YY                                                                                                                                                                                                                                                                                                                                                           | Protocol Approval DD/MM/YY | Am. 1 Approval DD/MM/YY | Am. 2 Approval DD/MM/YY | Am. 3 Approval DD/MM/YY |
|                                    |                           |                        | <p>Patient Information and Written Informed Consent Form, Chinese Ver, HK No.3 dated 15Jun2006<br/>Approval date 13/10/06</p> <p>Patient Information and Written Informed Consent Form, Chinese Ver, HK No.3 dated 15Jun2006<br/>Approval date 13/10/06</p> <p>Addendum to Patient Information and Written Informed Consent Form – English Ver, dated 11Dec2006<br/>Approval date 09/01/07</p> <p>Addendum to</p> |                            |                         |                         |                         |

| Greece                             |                                                                                                                                                            |                        |                                                                                                                                                                                                                                                                                                    |                            |                         |                         |                         |
|------------------------------------|------------------------------------------------------------------------------------------------------------------------------------------------------------|------------------------|----------------------------------------------------------------------------------------------------------------------------------------------------------------------------------------------------------------------------------------------------------------------------------------------------|----------------------------|-------------------------|-------------------------|-------------------------|
| Centre number(s) / Investigator(s) | IRB or IEC (name/address)                                                                                                                                  | IRB or IEC Chairperson | Informed Consent/Pt. Information Form Approval DD/MM/YY                                                                                                                                                                                                                                            | Protocol Approval DD/MM/YY | Am. 1 Approval DD/MM/YY | Am. 2 Approval DD/MM/YY | Am. 3 Approval DD/MM/YY |
|                                    |                                                                                                                                                            |                        | Patient Information and Written Informed Consent Form – Traditional Chinese Ver, dated 11Dec2006<br>Approval date 09/01/07                                                                                                                                                                         |                            |                         |                         |                         |
| 1402 / Wai Cho Yu                  | Clinical Research Ethics Committee Kowloon West Cluster<br><br>Address: Rm133, Block J, Princess Margaret Hospital, Lai Chi Kok, Kowloon, N.T., Hong Kong. | Dr. Yen-Chow TSAO      | Patient Information and Written Informed Consent Form, English Ver, HK No.1 dated 26Mar2002<br>Approval date 17/07/02<br><br>Patient Information and Written Informed Consent Form, Chinese Ver, HK No.1 dated 15Apr2002<br>Approval date 17/07/02<br><br>Patient Information and Written Informed | 17/07/02                   | NA                      | 04/10/2005              | 30/05/07                |

| Greece                             |                           |                        |                                                                                                                                                                                                                                                                                                                                                                                                                             |                            |                         |                         |                         |
|------------------------------------|---------------------------|------------------------|-----------------------------------------------------------------------------------------------------------------------------------------------------------------------------------------------------------------------------------------------------------------------------------------------------------------------------------------------------------------------------------------------------------------------------|----------------------------|-------------------------|-------------------------|-------------------------|
| Centre number(s) / Investigator(s) | IRB or IEC (name/address) | IRB or IEC Chairperson | Informed Consent/Pt. Information Form Approval DD/MM/YY                                                                                                                                                                                                                                                                                                                                                                     | Protocol Approval DD/MM/YY | Am. 1 Approval DD/MM/YY | Am. 2 Approval DD/MM/YY | Am. 3 Approval DD/MM/YY |
|                                    |                           |                        | <p>Consent Form, English Ver, HK No.2 dated 3Dec2004 Approval date 04/10/2005</p> <p>Patient Information and Written Informed Consent Form, Chinese Ver, HK No.2 dated 3Dec2004 Approval date 04/10/2005</p> <p>Supplemental Informed Consent – Long Term Follow up, English Ver 1.0, dated 30Nov2005 Approval date 18/08/06</p> <p>Supplemental Informed Consent – Long Term Follow up, Chinese Chinese Ver 1.0, dated</p> |                            |                         |                         |                         |

| Greece                             |                           |                        |                                                                                                                                                                                                                                                                                                                                                                                                                                                                                                |                            |                         |                         |                         |
|------------------------------------|---------------------------|------------------------|------------------------------------------------------------------------------------------------------------------------------------------------------------------------------------------------------------------------------------------------------------------------------------------------------------------------------------------------------------------------------------------------------------------------------------------------------------------------------------------------|----------------------------|-------------------------|-------------------------|-------------------------|
| Centre number(s) / Investigator(s) | IRB or IEC (name/address) | IRB or IEC Chairperson | Informed Consent/Pt. Information Form Approval DD/MM/YY                                                                                                                                                                                                                                                                                                                                                                                                                                        | Protocol Approval DD/MM/YY | Am. 1 Approval DD/MM/YY | Am. 2 Approval DD/MM/YY | Am. 3 Approval DD/MM/YY |
|                                    |                           |                        | <p>28Mar2006<br/>Approval date<br/>18/08/06</p> <p>Patient<br/>Information and<br/>Written Informed<br/>Consent Form,<br/>English Ver, HK<br/>No.3 dated<br/>15Jun2006<br/>Approval date<br/>07/11/06</p> <p>Patient<br/>Information and<br/>Written Informed<br/>Consent Form,<br/>Chinese Ver, HK<br/>No.3 dated<br/>15Jun2006<br/>Approval date<br/>07/11/06</p> <p>Patient<br/>Information and<br/>Written Informed<br/>Consent Form,<br/>Chinese Ver, HK<br/>No.3 dated<br/>15Jun2006</p> |                            |                         |                         |                         |

| Greece                             |                           |                        |                                                                                                                                                                                                                                                                                                                                                                                                                      |                            |                         |                         |                         |
|------------------------------------|---------------------------|------------------------|----------------------------------------------------------------------------------------------------------------------------------------------------------------------------------------------------------------------------------------------------------------------------------------------------------------------------------------------------------------------------------------------------------------------|----------------------------|-------------------------|-------------------------|-------------------------|
| Centre number(s) / Investigator(s) | IRB or IEC (name/address) | IRB or IEC Chairperson | Informed Consent/Pt. Information Form Approval DD/MM/YY                                                                                                                                                                                                                                                                                                                                                              | Protocol Approval DD/MM/YY | Am. 1 Approval DD/MM/YY | Am. 2 Approval DD/MM/YY | Am. 3 Approval DD/MM/YY |
|                                    |                           |                        | <p>Approval date<br/>20/09/06</p> <p>Patient Information and Written Informed Consent Form, Chinese Ver, HK No.3 dated 15Jun2006<br/>Approval date<br/>20/09/06</p> <p>Addendum to Patient Information and Written Informed Consent Form – English Ver, dated 11Dec2006<br/>Approval date<br/>02/02/07</p> <p>Addendum to Patient Information and Written Informed Consent Form – Traditional Chinese Ver, dated</p> |                            |                         |                         |                         |

| Greece                             |                                                                                                                                                                                                                     |                        |                                                                                                                                                                                                                                                                                                                                                                                     |                            |                         |                         |                         |
|------------------------------------|---------------------------------------------------------------------------------------------------------------------------------------------------------------------------------------------------------------------|------------------------|-------------------------------------------------------------------------------------------------------------------------------------------------------------------------------------------------------------------------------------------------------------------------------------------------------------------------------------------------------------------------------------|----------------------------|-------------------------|-------------------------|-------------------------|
| Centre number(s) / Investigator(s) | IRB or IEC (name/address)                                                                                                                                                                                           | IRB or IEC Chairperson | Informed Consent/Pt. Information Form Approval DD/MM/YY                                                                                                                                                                                                                                                                                                                             | Protocol Approval DD/MM/YY | Am. 1 Approval DD/MM/YY | Am. 2 Approval DD/MM/YY | Am. 3 Approval DD/MM/YY |
|                                    |                                                                                                                                                                                                                     |                        | 11Dec2006<br>Approval date<br>02/02/07                                                                                                                                                                                                                                                                                                                                              |                            |                         |                         |                         |
| 1403 / Hok Sum Chan                | <p>Joint The Chinese University of Hong Kong – New Territories East Cluster Clinical Research Ethics Committee</p> <p>Address: Flat 3C, Blk B, Staff Quarter, Prince of Wales Hospital, Shatin, N.T., Hong Kong</p> | Prof. Joseph Lau       | <p>Patient Information and Written Informed Consent Form, English Ver, HK No.1 dated 26Mar2002<br/>Approval date 19/07/02</p> <p>Patient Information and Written Informed Consent Form, Chinese Ver, HK No.1 dated 15Apr2002<br/>Approval date 19/07/02</p> <p>Supplemental Informed Consent – Long Term Follow up, English Ver 1.0, dated 30Nov2005<br/>Approval date 06/02/07</p> | 19/07/02                   | NA                      | 06/02/07                | Not available           |

| Greece                             |                           |                        |                                                                                                                                                                                                                                                                                                                                                                                                 |                            |                         |                         |                         |
|------------------------------------|---------------------------|------------------------|-------------------------------------------------------------------------------------------------------------------------------------------------------------------------------------------------------------------------------------------------------------------------------------------------------------------------------------------------------------------------------------------------|----------------------------|-------------------------|-------------------------|-------------------------|
| Centre number(s) / Investigator(s) | IRB or IEC (name/address) | IRB or IEC Chairperson | Informed Consent/Pt. Information Form Approval DD/MM/YY                                                                                                                                                                                                                                                                                                                                         | Protocol Approval DD/MM/YY | Am. 1 Approval DD/MM/YY | Am. 2 Approval DD/MM/YY | Am. 3 Approval DD/MM/YY |
|                                    |                           |                        | <p>Supplemental Informed Consent – Long Term Follow up, Traditional Chinese Ver 1.0, dated 28Mar2006<br/>Approval date 06/02/07</p> <p>Patient Information and Written Informed Consent Form, English Ver, HK No.3 dated 15Jun2006<br/>Approval date 06/02/07</p> <p>Patient Information and Written Informed Consent Form, Chinese Ver, HK No.3 dated 15Jun2006<br/>Approval date 06/02/07</p> |                            |                         |                         |                         |



| Greece                             |                                                                                                                      |                        |                                                                                                                                                                                                                                                                                                                                                                                                                                                                                               |                            |                         |                         |                         |
|------------------------------------|----------------------------------------------------------------------------------------------------------------------|------------------------|-----------------------------------------------------------------------------------------------------------------------------------------------------------------------------------------------------------------------------------------------------------------------------------------------------------------------------------------------------------------------------------------------------------------------------------------------------------------------------------------------|----------------------------|-------------------------|-------------------------|-------------------------|
| Centre number(s) / Investigator(s) | IRB or IEC (name/address)                                                                                            | IRB or IEC Chairperson | Informed Consent/Pt. Information Form Approval DD/MM/YY                                                                                                                                                                                                                                                                                                                                                                                                                                       | Protocol Approval DD/MM/YY | Am. 1 Approval DD/MM/YY | Am. 2 Approval DD/MM/YY | Am. 3 Approval DD/MM/YY |
| 1404 / Mo Lin<br>M. L. Wong        | Caritas Medical Centre<br>Ethics Committee<br><br>Address: Caritas<br>Medical Centre,<br>Shamshuipo,<br>Kowloon, HK. | Dr. Helen TINSLEY      | <p>Patient<br/>Information and<br/>Written Informed<br/>Consent Form,<br/>English Ver, HK<br/>No.1 dated<br/>26Mar2002<br/>Approval date<br/>23/09/02</p> <p>Patient<br/>Information and<br/>Written Informed<br/>Consent Form,<br/>Chinese Ver, HK<br/>No.1 dated<br/>15Apr2002<br/>Approval date<br/>23/09/02</p> <p>Patient<br/>Information and<br/>Written Informed<br/>Consent Form,<br/>English Ver, HK<br/>No.2 dated<br/>3Dec2004<br/>Approval date<br/>26/01/2005</p> <p>Patient</p> | 23/09/02                   | NA                      | 10/05/06                | 06/06/07                |

| Greece                             |                           |                        |                                                                                                                                                                                                                                                                                                                                                                                                                                        |                            |                         |                         |                         |
|------------------------------------|---------------------------|------------------------|----------------------------------------------------------------------------------------------------------------------------------------------------------------------------------------------------------------------------------------------------------------------------------------------------------------------------------------------------------------------------------------------------------------------------------------|----------------------------|-------------------------|-------------------------|-------------------------|
| Centre number(s) / Investigator(s) | IRB or IEC (name/address) | IRB or IEC Chairperson | Informed Consent/Pt. Information Form Approval DD/MM/YY                                                                                                                                                                                                                                                                                                                                                                                | Protocol Approval DD/MM/YY | Am. 1 Approval DD/MM/YY | Am. 2 Approval DD/MM/YY | Am. 3 Approval DD/MM/YY |
|                                    |                           |                        | <p>Information and Written Informed Consent Form, Chinese Ver, HK No.2 dated 3Dec2004<br/>Approval date 26/01/2005</p> <p>Supplemental Informed Consent – Long Term Follow up, English Ver 1.0, dated 30Nov2005<br/>Approval date 10/05/2006</p> <p>Supplemental Informed Consent – Long Term Follow up, Traditional Chinese Ver 1.0, dated 28Mar2006<br/>Approval date 10/05/2006</p> <p>Patient Information and Written Informed</p> |                            |                         |                         |                         |

| Greece                             |                           |                        |                                                                                                                                                                                                                                                                                                                                                                                                                      |                            |                         |                         |                         |
|------------------------------------|---------------------------|------------------------|----------------------------------------------------------------------------------------------------------------------------------------------------------------------------------------------------------------------------------------------------------------------------------------------------------------------------------------------------------------------------------------------------------------------|----------------------------|-------------------------|-------------------------|-------------------------|
| Centre number(s) / Investigator(s) | IRB or IEC (name/address) | IRB or IEC Chairperson | Informed Consent/Pt. Information Form Approval DD/MM/YY                                                                                                                                                                                                                                                                                                                                                              | Protocol Approval DD/MM/YY | Am. 1 Approval DD/MM/YY | Am. 2 Approval DD/MM/YY | Am. 3 Approval DD/MM/YY |
|                                    |                           |                        | <p>Consent Form, English Ver, HK No.3 dated 15Jun2006 Approval date 20/09/06</p> <p>Patient Information and Written Informed Consent Form, Chinese Ver, HK No.3 dated 15Jun2006 Approval date 20/09/06</p> <p>Addendum to Patient Information and Written Informed Consent, English Ver, dated 11Dec2006 Approval date 03/01/07</p> <p>Addendum to Patient Information and Written Informed Consent, Traditional</p> |                            |                         |                         |                         |

| Greece                             |                           |                        |                                                         |                            |                         |                         |                         |
|------------------------------------|---------------------------|------------------------|---------------------------------------------------------|----------------------------|-------------------------|-------------------------|-------------------------|
| Centre number(s) / Investigator(s) | IRB or IEC (name/address) | IRB or IEC Chairperson | Informed Consent/Pt. Information Form Approval DD/MM/YY | Protocol Approval DD/MM/YY | Am. 1 Approval DD/MM/YY | Am. 2 Approval DD/MM/YY | Am. 3 Approval DD/MM/YY |
|                                    |                           |                        | Chinese Ver, dated 11Dec2006<br>Approval date 03/01/07  |                            |                         |                         |                         |

| Greece                                                                                                                                                                                                                                                                                                                                                                                                                                                                                                                                                                                                                                                                                                                                                                                                                                                                                                                                                                                                                                                                                                                                                                                                                                                                                                                                                                                                                                                                                                                                                                                                                                                                                            |                                                                                                                                 |                        |                                                         |                            |                         |                         |                         |
|---------------------------------------------------------------------------------------------------------------------------------------------------------------------------------------------------------------------------------------------------------------------------------------------------------------------------------------------------------------------------------------------------------------------------------------------------------------------------------------------------------------------------------------------------------------------------------------------------------------------------------------------------------------------------------------------------------------------------------------------------------------------------------------------------------------------------------------------------------------------------------------------------------------------------------------------------------------------------------------------------------------------------------------------------------------------------------------------------------------------------------------------------------------------------------------------------------------------------------------------------------------------------------------------------------------------------------------------------------------------------------------------------------------------------------------------------------------------------------------------------------------------------------------------------------------------------------------------------------------------------------------------------------------------------------------------------|---------------------------------------------------------------------------------------------------------------------------------|------------------------|---------------------------------------------------------|----------------------------|-------------------------|-------------------------|-------------------------|
| Centre number(s) / Investigator(s)                                                                                                                                                                                                                                                                                                                                                                                                                                                                                                                                                                                                                                                                                                                                                                                                                                                                                                                                                                                                                                                                                                                                                                                                                                                                                                                                                                                                                                                                                                                                                                                                                                                                | IRB or IEC (name/address)                                                                                                       | IRB or IEC Chairperson | Informed Consent/Pt. Information Form Approval DD/MM/YY | Protocol Approval DD/MM/YY | Am. 1 Approval DD/MM/YY | Am. 2 Approval DD/MM/YY | Am. 3 Approval DD/MM/YY |
| Hungary                                                                                                                                                                                                                                                                                                                                                                                                                                                                                                                                                                                                                                                                                                                                                                                                                                                                                                                                                                                                                                                                                                                                                                                                                                                                                                                                                                                                                                                                                                                                                                                                                                                                                           |                                                                                                                                 |                        |                                                         |                            |                         |                         |                         |
| <p>Hungarian PI-IC version 1 (14 February 2002) was approved together with 1<sup>st</sup> submitted trial documents (included Protocol) by Local Ethics Committees.</p> <p>2<sup>nd</sup> version of PI-IC (dated 09 Nov 2004) had been submitted to OGYI and to the LECs in January 2005. OGYI had requested for further modification in it, so a modified 2<sup>nd</sup> version of PI-IC (dated 30 March 2005) had been submitted to OGYI in April 2005 and had been later approved by them. This latter version was sent to all LECs again. That is both versions were submitted to LECs.</p> <p>The LEC approvals are available either for version dated 09 Nov 2004 or for version dated 30 Mar 2005 depending on the date of the approval of the LEC.</p> <p>From the 15<sup>th</sup> of September 2005 new local regulation became effective. See Decree 35/2005 (VIII.26.) of the Minister of Health (filed in the ISF section 12). According to this local regulation Protocol amendments and change of other study related documents have to be approved by the Regulatory Authority and Central Ethics Committee. Requests for change of any study related documents have to be submitted only to the Regulatory Authority who forwards documents to the Central Ethics Committee if they decide it is required. Central Ethic Committee issues its opinion only for the Regulatory Authority and not directly for the sponsor or investigators.</p> <p>In case of Amendment 3 RA issued its approval without CEC review.</p> <p>Central Ethics Committee in Hungary was: Egészségügyi Tudományos Tanács, Klinikai Farmakológiai Etikai Bizottsága, 1051 Budapes Arany J. u. 6-8.</p> |                                                                                                                                 |                        |                                                         |                            |                         |                         |                         |
| 1301 / Zoltan Baliko                                                                                                                                                                                                                                                                                                                                                                                                                                                                                                                                                                                                                                                                                                                                                                                                                                                                                                                                                                                                                                                                                                                                                                                                                                                                                                                                                                                                                                                                                                                                                                                                                                                                              | POTE<br>Regionális<br>Kutatásetikai<br>Bizottsága<br>Szigeti u. 12, Pécs<br>7643                                                | Prof. Dr. Iván Kétyi   | 01-04-05<br>04-04-05                                    | 12-08-02                   | 01-08-03<br>29-09-03    | 01-02-06                | NA                      |
| 1302 / Marta Bisits                                                                                                                                                                                                                                                                                                                                                                                                                                                                                                                                                                                                                                                                                                                                                                                                                                                                                                                                                                                                                                                                                                                                                                                                                                                                                                                                                                                                                                                                                                                                                                                                                                                                               | Komárom-Esztergom<br>Megyei Önormányzat<br>Szent Borbála<br>Kórháza, Etikai<br>Bizottság<br>Dózya Gy. u. 77.,<br>Tatabánya 2800 | Dr. Gábor Nagy         | 09-02-05<br>25-02-05                                    | 30-10-02                   | 13-08-03<br>28-08-03    | 01-02-06                | NA                      |
| 1303 / György Böszörményi                                                                                                                                                                                                                                                                                                                                                                                                                                                                                                                                                                                                                                                                                                                                                                                                                                                                                                                                                                                                                                                                                                                                                                                                                                                                                                                                                                                                                                                                                                                                                                                                                                                                         | Országos Korányi<br>TBC és<br>Pulmonológiai Intézet                                                                             | Dr. Márta Valyon       | 02-02-05<br>04-02-05                                    | 09-09-02                   | 28-07-03<br>26-08-03    | 01-02-06                | NA                      |

| Greece                             |                                                                                                                                               |                                |                                                         |                            |                           |                         |                         |
|------------------------------------|-----------------------------------------------------------------------------------------------------------------------------------------------|--------------------------------|---------------------------------------------------------|----------------------------|---------------------------|-------------------------|-------------------------|
| Centre number(s) / Investigator(s) | IRB or IEC (name/address)                                                                                                                     | IRB or IEC Chairperson         | Informed Consent/Pt. Information Form Approval DD/MM/YY | Protocol Approval DD/MM/YY | Am. 1 Approval DD/MM/YY   | Am. 2 Approval DD/MM/YY | Am. 3 Approval DD/MM/YY |
|                                    | Intézményi Kutatásetikai Bizottsága Pihenő út 1., Budapest 1529                                                                               |                                |                                                         |                            |                           |                         |                         |
| 1304 / Dr. Maria Marton            | Regionális Tudományos Kutatásetikai Bizottság Borsod-Abaúj-Zemplén Megye Szentpéteri kapu 72-76., Miskolc 3501                                | Dr. László Szabó               | 11-02-05<br>28-04-07                                    | 09-07-02                   | 04-08-03<br>28-04-07      | 01-02-06                | NA                      |
| 1305 / Karoly Fonay                | Egészségügyi Tudományos Tanács Regionális Kutatásetikai Bizottsága Győr-Moson-Sopron és Komárom - Esztergom Megye Vasvári Pál u. 2, Győr 9002 | Dr. György Ostorharics-Horváth | 01-02-05<br>16-03-05                                    | 16-10-02                   | not sent back<br>30-09-03 | 01-02-06                | NA                      |
| 1306 / Zsuzsa Györi                | Tüdőgyógyintézet Törökbálint Intézeti Kutatásetikai Bizottság Munkácsy M. u. 70., Törökbálint 2045                                            | Dr. László Perger              | 01-02-05<br>04-02-08                                    | 19-06-02                   | 18-08-03<br>26-08-03      | 01-02-06                | NA                      |
| 1307 / Laszlo Hajdu                | Szegedi Tudományegyetem ÁOK, Regionális                                                                                                       | Prof. Dr. Tibor Wittmann       | 31-01-05<br>25-04-05                                    | 05-11-02                   | 18-08-03<br>03-10-03      | 01-02-06                | NA                      |

| Greece                             |                                                                                                                                                                                                                            |                           |                                                         |                            |                         |                         |                         |
|------------------------------------|----------------------------------------------------------------------------------------------------------------------------------------------------------------------------------------------------------------------------|---------------------------|---------------------------------------------------------|----------------------------|-------------------------|-------------------------|-------------------------|
| Centre number(s) / Investigator(s) | IRB or IEC (name/address)                                                                                                                                                                                                  | IRB or IEC Chairperson    | Informed Consent/Pt. Information Form Approval DD/MM/YY | Protocol Approval DD/MM/YY | Am. 1 Approval DD/MM/YY | Am. 2 Approval DD/MM/YY | Am. 3 Approval DD/MM/YY |
|                                    | Humán Orvosbiológiai Kutatásetikai Bizottsága<br>Korányi fasor 8.,<br>Szeged 6720<br>untill 18 May 2006<br>Semmelweis Kórház<br>Kutatásetikai Bizottsága<br>Dr. Monzaprt L. u. 1.,<br>Kiskunhalas 6400<br>from 18 May 2006 | Dr. Katalin Takács        |                                                         |                            |                         |                         |                         |
| 1308 / Judit Lukács                | Szent János Kórház –<br>Rendelőintézet<br>Tudományos Bizottsága és IKEB<br>Diósárok u. 1.,<br>Budapest 1125                                                                                                                | Prof. Dr. András Jánosi   | 01-02-05<br>17-01-08                                    | 11-11-02                   | 29-07-03<br>23-09-03    | 01-02-06                | NA                      |
| 1309 / Gabor Kovacs                | Országos Korányi TBC és Pulmonológiai Intézet<br>Intézményi Kutatásetikai Bizottsága<br>Pihenő út 1.,<br>Budapest 1529                                                                                                     | Dr. Márta Valyon          | 09-05-05<br>28-02-08                                    | 24-07-02                   | 25-07-03<br>22-11-06    | 01-02-06                | NA                      |
| 1310 / Pal Magyar                  | Semmelweis Egyetem<br>Regionális és Tudományos Kutatásetikai Bizottsága                                                                                                                                                    | Prof. Dr. Péter Sótornyai | 11-02-05<br>30-05-05                                    | 21-10-02                   | 28-08-03<br>07-10-03    | 01-02-06                | NA                      |

| Greece                             |                                                                                                                                                                                                                                                                              |                                                     |                                                         |                            |                           |                         |                         |
|------------------------------------|------------------------------------------------------------------------------------------------------------------------------------------------------------------------------------------------------------------------------------------------------------------------------|-----------------------------------------------------|---------------------------------------------------------|----------------------------|---------------------------|-------------------------|-------------------------|
| Centre number(s) / Investigator(s) | IRB or IEC (name/address)                                                                                                                                                                                                                                                    | IRB or IEC Chairperson                              | Informed Consent/Pt. Information Form Approval DD/MM/YY | Protocol Approval DD/MM/YY | Am. 1 Approval DD/MM/YY   | Am. 2 Approval DD/MM/YY | Am. 3 Approval DD/MM/YY |
|                                    | Üllői út 93., Budapest 1091                                                                                                                                                                                                                                                  |                                                     |                                                         |                            |                           |                         |                         |
| 1311 / Gabriella Nagy              | Szent Imre Kórház Intézményi Kutatásetikai Bizottság Tétényi út 12-16., Budapest 1125                                                                                                                                                                                        | Dr. Imre Orbán                                      | 04-02-05<br>09-03-05                                    | 11-09-02                   | 05-08-03<br>03-09-03      | site closed             | site closed             |
| 1312 / Miklos Namenyi              | Veszprém Megyei Csolnoky Ferenc Kórház- Rendelőintézet Etikai Bizottsága Kórház u. 1., Veszprém 8200 until 31 Dec 2003<br>Vas Megyei Önkormányzat Markuszovszky Kórháza Regionális Tudományos Kutatásetikai Bizottság Markuszovszky u. 3., Szombathely 9700 from 01 Jan 2004 | Dr. Ferenc Brittig<br><br>Prof. Dr. Antal Salamon   | 14-02-05<br>26-09-07                                    | 04-06-04                   | Not sent back<br>26-07-03 | 01-02-06                | NA                      |
| 1313 / Laszlo Petö                 | Budai MÁV Kórház Etikai Bizottsága Szanatórium u. 2., Budapest 1528                                                                                                                                                                                                          | Dr. Paróczai Karolin<br><br>Prof. Dr. Péter Sótönyi | 25-02-05<br>28-06-07                                    | 22-11-02                   | 31-07-03<br>28-06-07      | 01-02-06                | NA                      |



| Greece                             |                                                                                                                                                             |                          |                                                         |                            |                           |                         |                         |
|------------------------------------|-------------------------------------------------------------------------------------------------------------------------------------------------------------|--------------------------|---------------------------------------------------------|----------------------------|---------------------------|-------------------------|-------------------------|
| Centre number(s) / Investigator(s) | IRB or IEC (name/address)                                                                                                                                   | IRB or IEC Chairperson   | Informed Consent/Pt. Information Form Approval DD/MM/YY | Protocol Approval DD/MM/YY | Am. 1 Approval DD/MM/YY   | Am. 2 Approval DD/MM/YY | Am. 3 Approval DD/MM/YY |
|                                    | until 10 Oct 2007<br>Semmelweis Egyetem<br>Regionális és<br>Tudományos<br>Kutatásetikai<br>Bizottsága<br>Üllői út 93., Budapest<br>1091<br>from 11 Oct 2007 |                          |                                                         |                            |                           |                         |                         |
| 1314 / Attila Somfay               | Szegedi<br>Tudományegyetem<br>ÁOK, Regionális<br>Humán<br>Orvosbiológiai<br>Kutatásetikai<br>Bizottsága<br>Korányi fasor 8.,<br>Szeged 6720                 | Prof. Dr. Tibor Wittmann | 09-05-05<br>30-05-05                                    | 14-10-02                   | 05-08-03<br>01-10-03      | 01-02-06                | NA                      |
| 1315 / Zsolt Kiraly                | Vas Megyei<br>Önkormányzat<br>Markusovszky<br>Kórháza<br>Regionális<br>Tudományos<br>Kutatásetikai<br>Bizottság<br>Markusovszky u. 3.,<br>Szombathely 9700  | Prof. Dr. Antal Salamon  | 13-05-05<br>26-09-07                                    | 24-09-02                   | Not sent back<br>31-08-03 | 01-02-06                | NA                      |
| 1316 / Janos Strausz               | Tüdőgyógyintézet<br>Törökbálint<br>Intézeti Kutatásetikai<br>Bizottság, Munkácsy                                                                            | Dr. László Perger        | 01-02-05<br>25-11-05                                    | 19-06-02                   | 18-08-03<br>26-08-03      | 01-02-06                | NA                      |

| Greece                             |                                                                                                                                 |                          |                                                         |                            |                         |                         |                         |
|------------------------------------|---------------------------------------------------------------------------------------------------------------------------------|--------------------------|---------------------------------------------------------|----------------------------|-------------------------|-------------------------|-------------------------|
| Centre number(s) / Investigator(s) | IRB or IEC (name/address)                                                                                                       | IRB or IEC Chairperson   | Informed Consent/Pt. Information Form Approval DD/MM/YY | Protocol Approval DD/MM/YY | Am. 1 Approval DD/MM/YY | Am. 2 Approval DD/MM/YY | Am. 3 Approval DD/MM/YY |
|                                    | M. u. 70., Törökbálint 2045                                                                                                     |                          |                                                         |                            |                         |                         |                         |
| 1317 / Zsuzsanna Szalai            | Karolina Kórház – Rendelőintézet Intézeti Kutatásetikai Bizottság, Régi Várház tér 2-4., Mosonmagyaróvár 9200                   | Dr. Zoltán Várallyay     | 10-02-05<br>18-05-05                                    | 08-11-02                   | 25-07-03<br>30-07-03    | 01-02-06                | NA                      |
| 1318 / Maria Szilasi               | DEOEC Tudományos Bizottságának Regionális Kutatásetikai Bizottsága Nagyaerdei krt. 98., Debrecen 4012                           | Prof. Dr. Irén Horkay    | 15-02-05<br>31-03-05                                    | 24-06-02                   | 24-09-03<br>29-09-03    | 01-02-06                | NA                      |
| 1319 / Barna Szima                 | Vas Megyei Önkormányzat Markusovszky Kórháza Regionális Tudományos Kutatásetikai Bizottság Markusovszky u. 3., Szombathely 9700 | Prof. Dr. Antal Salamon  | 13-05-05<br>17-01-08                                    | 02-09-02                   | 28-07-03<br>17-01-08    | 01-02-06                | NA                      |
| 1320 / Zsuzsa Sztancsik            | Szegedi Tudományegyetem ÁOK, Regionális Humán Orvosbiológiai Kutatásetikai                                                      | Prof. Dr. Tibor Wittmann | 09-05-05<br>30-05-05                                    | 14-10-02                   | 01-08-03<br>01-10-03    | 01-02-06                | NA                      |

| Greece                             |                                                |                        |                                                         |                            |                         |                         |                         |
|------------------------------------|------------------------------------------------|------------------------|---------------------------------------------------------|----------------------------|-------------------------|-------------------------|-------------------------|
| Centre number(s) / Investigator(s) | IRB or IEC (name/address)                      | IRB or IEC Chairperson | Informed Consent/Pt. Information Form Approval DD/MM/YY | Protocol Approval DD/MM/YY | Am. 1 Approval DD/MM/YY | Am. 2 Approval DD/MM/YY | Am. 3 Approval DD/MM/YY |
|                                    | Bizottsága<br>Korányi fasor 8.,<br>Szeged 6720 |                        |                                                         |                            |                         |                         |                         |

| Ireland                            |                                                                                                   |                           |                                                         |                            |                         |                         |                         |
|------------------------------------|---------------------------------------------------------------------------------------------------|---------------------------|---------------------------------------------------------|----------------------------|-------------------------|-------------------------|-------------------------|
| Centre number(s) / Investigator(s) | IRB or IEC (name/address)                                                                         | IRB or IEC Chairperson    | Informed Consent/Pt. Information Form Approval DD/MM/YY | Protocol Approval DD/MM/YY | Am. 1 Approval DD/MM/YY | Am. 2 Approval DD/MM/YY | Am. 3 Approval DD/MM/YY |
| 1501 / Richard Costello            | Beaumont Hospital<br>Ethics Committee<br>Beaumont Hospital<br>Dublin 9<br>Ireland                 | Professor Gerry McElvaney | 14/01/03                                                | 14/01/03                   | 16/05/03                | 15/11/05                | 25/04/07                |
| 1503 / Seamas Donnelly             | Ethics Committee<br>St. Vincents Hospital<br>Elm Park<br>Dublin 4<br>Ireland                      | Dr. Douglas Veale         | 12/12/02                                                | 12/12/02                   | 19/05/03                | N/A                     | N/A                     |
| 1505 / Conor Burke                 | Ethics Committee<br>James Connolly<br>Memorial Hospital<br>Blanchardstown<br>Dublin 15<br>Ireland | Dr. Conor Burke           | 04/02/03                                                | 04/02/03                   | 21/05/03                | 15/11/05                | 25/04/07                |

| Italy                              |                           |                        |                                                         |                            |                         |                         |                         |
|------------------------------------|---------------------------|------------------------|---------------------------------------------------------|----------------------------|-------------------------|-------------------------|-------------------------|
| Centre number(s) / Investigator(s) | IRB or IEC (name/address) | IRB or IEC Chairperson | Informed Consent/Pt. Information Form Approval DD/MM/YY | Protocol Approval DD/MM/YY | Am. 1 Approval DD/MM/YY | Am. 2 Approval DD/MM/YY | Am. 3 Approval DD/MM/YY |

## Italy

| Centre number(s) / Investigator(s) | IRB or IEC (name/address)                                                                                                            | IRB or IEC Chairperson | Informed Consent/Pt. Information Form Approval DD/MM/YY | Protocol Approval DD/MM/YY | Am. 1 Approval DD/MM/YY | Am. 2 Approval DD/MM/YY | Am. 3 Approval DD/MM/YY |
|------------------------------------|--------------------------------------------------------------------------------------------------------------------------------------|------------------------|---------------------------------------------------------|----------------------------|-------------------------|-------------------------|-------------------------|
| 1601 / Pier Luigi Paggiaro         | COMITATO PER LA SPERIMENTAZIONE CLINICA DEI MEDICINALI DELL'AZIENDA OSPEDALIERO UNIVERSITARIA PISANA DI PISA VIA ROMA, 67 56126 PISA | Romano Danesi          | 14/03/2002                                              | 17/05/2002                 | 25/07/2003              | 09/03/2006              | 13/09/2007              |
| 1602 / Carlo Cattaneo              | COMITATO ETICO INDIPENDENTE DELL'AZIENDA OSPEDALIERA DELLA PROVINCIA DI PAVIA Viale Repubblica n. 34 27100 PAVIA                     | Alessandra Marinoni    | 14/03/2002                                              | 23/07/2002                 | 23/09/2003              | 20/04/2006              | 25/09/2007              |
| 1603 / Marco Dottorini             | COMITATO ETICO DELLE AZIENDE SANITARIE DELL'UMBRIA DI PERUGIA via della Rivoluzione, 16, 06070 Ellera di Corciano (PG)               | Adolfo Puxeddu         | 14/03/2002                                              | 18/07/2002                 | 11/09/2003              | 28/02/2006              | 13/09/2007              |
| 1604 / Maurizio Dottorini          | COMITATO ETICO DELLE AZIENDE SANITARIE DELL'UMBRIA DI PERUGIA via della Rivoluzione,                                                 | Adolfo Puxeddu         | 14/03/2002                                              | 18/07/2002                 | 11/09/2003              | 28/02/2006              | 13/09/2007              |

**Italy**

| <b>Centre number(s) / Investigator(s)</b> | <b>IRB or IEC (name/address)</b>                                                                                             | <b>IRB or IEC Chairperson</b> | <b>Informed Consent/Pt. Information Form Approval DD/MM/YY</b> | <b>Protocol Approval DD/MM/YY</b> | <b>Am. 1 Approval DD/MM/YY</b> | <b>Am. 2 Approval DD/MM/YY</b> | <b>Am. 3 Approval DD/MM/YY</b> |
|-------------------------------------------|------------------------------------------------------------------------------------------------------------------------------|-------------------------------|----------------------------------------------------------------|-----------------------------------|--------------------------------|--------------------------------|--------------------------------|
|                                           | 16, 06070 Ellera di Corciano (PG)                                                                                            |                               |                                                                |                                   |                                |                                |                                |
| 1606 / Roberto Tazza                      | COMITATO ETICO DELLE AZIENDE SANITARIE DELL'UMBRIA DI PERUGIA<br>via della Rivoluzione,<br>16, 06070 Ellera di Corciano (PG) | Adolfo Puxeddu                | 14/03/2002                                                     | 18/07/2002                        | 11/09/2003                     | 28/02/2006                     | 13/09/2007                     |
| 1607 / Prof. Pietro Pirina                | COMITATO DI BIOETICA DELLA ASL DI SASSARI<br>VIA MONTE GRAPPA, 82<br>07100 SASSARI                                           | Guido Fellin                  | 14/03/2002                                                     | 10/07/2002                        | 23/09/2003                     | 12/09/2006                     | 17/09/2007                     |
| 1608 / Riccardo Ortu                      | COMITATO DI BIOETICA DELLA ASL DI SASSARI<br>VIA MONTE GRAPPA, 82<br>07100 SASSARI                                           | Guido Fellin                  | 14/03/2002                                                     | 10/07/2002                        | 23/09/2003                     | 12/09/2006                     | 17/09/2007                     |
| 1612 / Mario Sugamiele                    | AZIENDA OSPEDALIERA S.ANTONIO ABATE - TRAPANI<br>via cosenza 82<br>91016 ERICE (TP)                                          | Vincenzo Lima                 | 14/03/2002                                                     | 10/07/2002                        | 16/10/2003                     | 06/04/2006                     | 14/12/2007                     |
| 1613 / Michele Mastroberardino            | CE c/o Ufficio Amministrativo<br>A.O. "San Giuseppe                                                                          | Fernando Salerno              | 14/03/2002                                                     | 20/08/2002                        | 19/12/2003                     | 29/09/2006                     | 27/09/2007                     |

| Italy                              |                                                                                                                                                                                                 |                        |                                                         |                            |                         |                         |                         |
|------------------------------------|-------------------------------------------------------------------------------------------------------------------------------------------------------------------------------------------------|------------------------|---------------------------------------------------------|----------------------------|-------------------------|-------------------------|-------------------------|
| Centre number(s) / Investigator(s) | IRB or IEC (name/address)                                                                                                                                                                       | IRB or IEC Chairperson | Informed Consent/Pt. Information Form Approval DD/MM/YY | Protocol Approval DD/MM/YY | Am. 1 Approval DD/MM/YY | Am. 2 Approval DD/MM/YY | Am. 3 Approval DD/MM/YY |
|                                    | Moscati”<br>Contrada Amoretta<br>Città Ospedaliera<br>83100 AVELLINO                                                                                                                            |                        |                                                         |                            |                         |                         |                         |
| 1614 / Giuseppe Anzalone           | COMITATO ETICO<br>ANCHE PER LA<br>VALUTAZIONE E<br>CONTROLLO<br>DELLE<br>SPERIMENTAZIONI<br>CLINICHE DEI<br>MEDICINALI<br>DELLA AUSL 4 DI<br>PRATO<br>V.le delle Repubblica<br>240, 59100 PRATO | Fabrizio Ledda         | 14/03/2002                                              | 01/07/2002                 | 30/10/2003              | 10/04/2006              | 17/09/2007              |
| 1615 / Giorgio Walter Canonica     | COMITATO ETICO<br>DELL’ AZIENDA<br>OSPEDALIERA<br>UNIVERSITARIA S.<br>MARTINO DI<br>GENOVA<br>Largo Rosanna Benzi<br>10, 16132 GENOVA                                                           | Luigi Francesco Meloni | 14/03/2002                                              | 11/07/2002                 | 29/09/2003              | 19/05/2006              | 26/10/2007              |
| 1617 / Dr. Fernando De Benedetto   | COMITATO ETICO<br>Università degli Studi<br>“G. D’Annunzio”<br>c/o Presidenza Facoltà<br>di Medicina<br>Via dei Vestini, 31<br>66013 CHIETI                                                     | Mauro Carabella        | 14/03/2002                                              | 30/07/2002                 | 23/09/2003              | 02/05/2006              | 25/09/2007              |

| Italy                              |                                                                                                                                                                                 |                        |                                                         |                            |                         |                         |                                                                                               |
|------------------------------------|---------------------------------------------------------------------------------------------------------------------------------------------------------------------------------|------------------------|---------------------------------------------------------|----------------------------|-------------------------|-------------------------|-----------------------------------------------------------------------------------------------|
| Centre number(s) / Investigator(s) | IRB or IEC (name/address)                                                                                                                                                       | IRB or IEC Chairperson | Informed Consent/Pt. Information Form Approval DD/MM/YY | Protocol Approval DD/MM/YY | Am. 1 Approval DD/MM/YY | Am. 2 Approval DD/MM/YY | Am. 3 Approval DD/MM/YY                                                                       |
| 1618 / Franco Falcone              | COMITATO ETICO<br>c/o Dipartimento<br>Farmaceutico Azienda<br>USL di Bologna<br>Via Gramsci, 12<br>40121 BOLOGNA                                                                | Lucia Alberghini       | 14/03/2002                                              | 18/07/2002                 | 11/12/2003              | 22/03/2006              | 18/12/2007                                                                                    |
| 1619 / Pietro Greco                | COMITATO ETICO<br>DELLA ASL DI<br>CARBONIA (CI)<br>Via Dalmazia 83<br>09013 CARBONIA<br>(CI)                                                                                    | De Gregorio            | 14/03/2002                                              | 09/07/2002                 | 30/09/2003              | 28/03/2006              | 29/10/2007                                                                                    |
| 1622 / Adalberto Ciaccia           | Comitato Etico della<br>Provincia di Ferrara<br>Corso Giovecca, 203<br>44100 FERRARA                                                                                            | Voci / Palara          | 14/03/2002                                              | 23/07/2002                 | 07/10/2003              | 12/04/2006              | 27/09/2007                                                                                    |
| 1623 / Rigoletta Vincenti          | Comitato Etico ASL 1<br>di Massa e Carrara<br>Via Porta Parma<br>54027<br>PONTREMOLI (MS)                                                                                       | Margherita Rinaldi     | 14/03/2002                                              | 06/07/2002                 | 25/09/2003              | 02/03/2006              | 07/08/2007                                                                                    |
| 1624 / Alberto Tubaldi             | COMITATO ETICO<br>INTERZONALE<br>DELLA ASUR ZONA<br>TERRITORIALE 8 DI<br>CIVITANOVA<br>MARCHE E ZONA<br>TERRITORIALE 9 DI<br>MACERATA<br>VIA SANTA LUCIA<br>2<br>62100 MACERATA | Americo Sbriccoli      | 14/03/2002                                              | 26/06/2002                 | 25/09/2003              | 24/08/2006              | approval not<br>needed: the<br>ec will<br>provide a<br>note to take<br>cognizance<br>of am. 3 |



| Italy                              |                                                                                                                                |                        |                                                         |                            |                         |                         |                         |
|------------------------------------|--------------------------------------------------------------------------------------------------------------------------------|------------------------|---------------------------------------------------------|----------------------------|-------------------------|-------------------------|-------------------------|
| Centre number(s) / Investigator(s) | IRB or IEC (name/address)                                                                                                      | IRB or IEC Chairperson | Informed Consent/Pt. Information Form Approval DD/MM/YY | Protocol Approval DD/MM/YY | Am. 1 Approval DD/MM/YY | Am. 2 Approval DD/MM/YY | Am. 3 Approval DD/MM/YY |
| 1629 / Virginia De Rose            | COMITATO ETICO DELL'AZIENDA OSPEDALIERA UNIVERSITARIA S. LUIGI GONZAGA DI ORBASSANO REGIONE GONZOLE 10 10043 ORBASSANO         | Francesco Di Carlo     | 14/03/2002                                              | 09/09/2002                 | 08/09/2003              | 29/05/2006              | 01/10/2007              |
| 1631 / Gabriele Ferretti           | COMITATO ETICO DELL'AZIENDA OSPEDALIERA SS. ANTONIO E BIAGIO E CESARE ARRIGO DI ALESSANDRIA VIA VENEZIA 16, 15100, ALESSANDRIA | Ilario Viano           | 14/03/2002                                              | 09/09/2002                 | 29/09/2003              | 21/02/2006              | 18/09/2007              |
| 1632 / Gianni Forconi              | COMITATO ETICO DELLA ASL TO/2 DI TORINO STRADA DELL'ARRIVORE 25/A, 10154 TORINO                                                | Maria Chiara Cassone   | 14/03/2002                                              | 28/10/2002                 | NA                      | NA                      | NA                      |
| 1633 / Stefano Gasparini           | COMITATO ETICO DELL'AZIENDA OSPEDALIERO-UNIVERSITARIA OSPEDALI RIUNITI UMBERTO I - G.M. LANCISI - G. SALESII DI ANCONA         | Tullio Manzoni         | 14/03/2002                                              | 03/10/2002                 | 27/11/2003              | NA                      | NA                      |

## Italy

| Centre number(s) / Investigator(s) | IRB or IEC (name/address)                                                                                                                                       | IRB or IEC Chairperson | Informed Consent/Pt. Information Form Approval DD/MM/YY | Protocol Approval DD/MM/YY | Am. 1 Approval DD/MM/YY | Am. 2 Approval DD/MM/YY | Am. 3 Approval DD/MM/YY |
|------------------------------------|-----------------------------------------------------------------------------------------------------------------------------------------------------------------|------------------------|---------------------------------------------------------|----------------------------|-------------------------|-------------------------|-------------------------|
|                                    | VIA CONCA 71<br>60126 ANCONA                                                                                                                                    |                        |                                                         |                            |                         |                         |                         |
| 1634 / Delfino<br>Legnani          | COMITATO ETICO<br>LOCALE PER LA<br>SPERIMENTAZIONE<br>CLINICA<br>DELL'AZIENDA<br>OSPEDALIERA<br>LUIGI SACCO DI<br>MILANO<br>VIA G.B. GRASSI, 74<br>20157 MILANO | Emilio Tracbuchhi      | 14/03/2002                                              | 18/09/2002                 | 17/09/2003              | 29/03/2006              | 19/09/2007              |
| 1635 / Giovanni<br>Paolo Ligia     | COMITATO ETICO<br>DELLA ASL DI<br>CAGLIARI<br>VIA LOGUDORO 17<br>09127 CAGLIARI                                                                                 | Luigi Minerba          | 14/03/2002                                              | 18/09/2002                 | 22/10/2003              | 24/05/2006              | 24/10/2007              |
| 1639 / Vincenzo<br>Padua           | COMITATO ETICO<br>DELLA AUSL 7 DI<br>RAGUSA<br>Piazza Igea 2<br>97100 RAGUSA                                                                                    | Pietro Bonomo          | 14/03/2002                                              | 25/09/2002                 | 23/09/2003              | 26/09/2006              | 10/09/2007              |
| 1640 / Giorgio<br>Santelli         | COMITATO ETICO<br>PER LA<br>SPERIMENTAZIONE<br>CLINICA DELLA<br>PROVINCIA DI<br>TREVISO<br>BORGO CAVALLI<br>42<br>31100 TREVISO                                 | Paolo Tottolo          | 14/03/2002                                              | 25/09/2002                 | 29/10/2003              | 24/05/2006              | 20/09/2007              |

| Italy                              |                                                                                                                                                                                             |                        |                                                         |                            |                         |                         |                         |
|------------------------------------|---------------------------------------------------------------------------------------------------------------------------------------------------------------------------------------------|------------------------|---------------------------------------------------------|----------------------------|-------------------------|-------------------------|-------------------------|
| Centre number(s) / Investigator(s) | IRB or IEC (name/address)                                                                                                                                                                   | IRB or IEC Chairperson | Informed Consent/Pt. Information Form Approval DD/MM/YY | Protocol Approval DD/MM/YY | Am. 1 Approval DD/MM/YY | Am. 2 Approval DD/MM/YY | Am. 3 Approval DD/MM/YY |
| 1643 / Francesco Mazza             | COMITATO ETICO INDIPENDENTE PER LA VALUTAZIONE DELLE SPERIMENTAZIONI CLINICHE DEI MEDICINALI DELL'AZIENDA OSPEDALIERA S. MARIA DEGLI ANGELI DI PORDENONE via montereale, 24 33170 PORDENONE | ----                   | 14/03/2002                                              | 13/09/2002                 | 14/04/2004              | 30/05/2006              | 30-31/10/2007           |
| 1645 / Roberto Cogo                | COMITATO ETICO DELL'AZIENDA OSPEDALIERA DI MELEGNANO (MI) VIA PANDINA 1 20070 VIZZOLO PREDABISSI (MI)                                                                                       | Roberto Cosentina      | 14/03/2002                                              | 22/10/2002                 | 24/02/2004              | NA                      | NA                      |
| 1646 / Andrea Lopes Pegna          | COMITATO ETICO PER LA SPERIMENTAZIONE CLINICA DEI MEDICINALI DELL'AZIENDA OSPEDALIERO-UNIVERSITARIA CAREGGI DI                                                                              | Giovanni Passagnoli    | 14/03/2002                                              | 23/09/02                   | 15/09/2003              | 07/03/2006              | 03/10/2007              |

## Italy

| Centre number(s) / Investigator(s) | IRB or IEC (name/address)                                                                                                                                                                   | IRB or IEC Chairperson | Informed Consent/Pt. Information Form Approval DD/MM/YY | Protocol Approval DD/MM/YY | Am. 1 Approval DD/MM/YY | Am. 2 Approval DD/MM/YY | Am. 3 Approval DD/MM/YY |
|------------------------------------|---------------------------------------------------------------------------------------------------------------------------------------------------------------------------------------------|------------------------|---------------------------------------------------------|----------------------------|-------------------------|-------------------------|-------------------------|
|                                    | FIRENZE<br>viale Pieraccini, 28<br>50139 FIRENZE                                                                                                                                            |                        |                                                         |                            |                         |                         |                         |
| 1647 / Massimo Pistolesi           | COMITATO ETICO<br>PER LA<br>SPERIMENTAZIONE<br>CLINICA DEI<br>MEDICINALI<br>DELL'AZIENDA<br>OSPEDALIERO-<br>UNIVERSITARIA<br>CAREGGI DI<br>FIRENZE<br>viale Pieraccini, 28<br>50139 FIRENZE | Giovanni Passagnoli    | 14/03/2002                                              | 23/09/02                   | 15/09/2003              | 07/03/2006              | 03/10/2007              |
| 1648 / Vincenzo Colorizio          | COMITATO ETICO<br>DELLA AUSL 4 DI<br>L'AQUILA<br>Azienda U.S.L. 4<br>Comitato Etico ex<br>P.O. Santa Maria di<br>Collemaggio<br>67100 L'AQUILA                                              | Giuseppe Cerone        | 14/03/2002                                              | 13/08/02                   | 24/09/03                | 23/03/06                | 13/09/07                |
| 1649 / Dr. Pietro Zanon            | COMITATO ETICO<br>DELL'AZIENDA<br>OSPEDALIERA<br>OSPEDALE DI<br>CIRCOLO DI BUSTO<br>ARSIZIO (VA)<br>PIAZZALE SOLARO,<br>3<br>21052 BUSTO                                                    | Emanuela Cerruti       | 14/03/2002                                              | 04/10/02                   | 12/12/03                | 27/10/06                | 19/10/07                |

| Italy                                     |                                  |                               |                                                                |                                   |                                |                                |                                |
|-------------------------------------------|----------------------------------|-------------------------------|----------------------------------------------------------------|-----------------------------------|--------------------------------|--------------------------------|--------------------------------|
| <b>Centre number(s) / Investigator(s)</b> | <b>IRB or IEC (name/address)</b> | <b>IRB or IEC Chairperson</b> | <b>Informed Consent/Pt. Information Form Approval DD/MM/YY</b> | <b>Protocol Approval DD/MM/YY</b> | <b>Am. 1 Approval DD/MM/YY</b> | <b>Am. 2 Approval DD/MM/YY</b> | <b>Am. 3 Approval DD/MM/YY</b> |
|                                           | ARSIZIO (VA)                     |                               |                                                                |                                   |                                |                                |                                |

| Japan                              |                                                                                               |                                                                                                          |                                                         |                            |                         |                         |                         |
|------------------------------------|-----------------------------------------------------------------------------------------------|----------------------------------------------------------------------------------------------------------|---------------------------------------------------------|----------------------------|-------------------------|-------------------------|-------------------------|
| Centre number(s) / Investigator(s) | IRB or IEC (name/address)                                                                     | IRB or IEC Chairperson                                                                                   | Informed Consent/Pt. Information Form Approval DD/MM/YY | Protocol Approval DD/MM/YY | Am. 1 Approval DD/MM/YY | Am. 2 Approval DD/MM/YY | Am. 3 Approval DD/MM/YY |
| 1701 / Masaharu Nishimura          | The IRB of Hokkaido University / Nishi 5, Kita Juyonjou, Kita-ku, Sapporo, Hokkaido, 060-8648 | Katsumi Miyazaki (12 September 2002)<br>Ken Iseki (7 March 2006)                                         | 12/09/02                                                | 12/09/02                   | 05/08/03                | 07/03/06                | 05/06/07                |
| 1702 / Kohei Yamauchi              | The IRB of Iwate Medical University / 19-1 Uchimarui, Morioka, Iwate, 020-8505                | Hiroshi Inoue (18 September 2002)<br>Kazuyuki Suzuki (16 March 2006)                                     | 18/09/02                                                | 18/09/02                   | 04/08/03                | 16/03/06                | 30/05/07                |
| 1703 / Hiromasa Ogawa              | The IRB of Tohoku University / 1-1 Seiryō-cho, Aoba-ku, Sendai, Miyagi, 980-8574              | Kazuhiko Taniuchi (2 September 2002 / 1 September 2003/<br>1 March 2006)<br>Toshio Hattori (2 July 2007) | 02/09/02                                                | 02/09/02                   | 01/09/03                | 01/03/06                | 02/07/07                |
| 1704 / Keiji Kimura                | The IRB of Hiraka General Hospital / 3-1, Aza Yatsukuchi, Maegou, Yokote, Akita, 013-8610     | Toshiharu Okubo (20 January 2003 / 19 August 2003)<br>Katsu Hirayama (6 February 2006/<br>6 August 2007) | 20/01/03                                                | 20/01/03                   | 19/08/03                | 06/02/06                | 06/08/07                |
| 1705 / Norihiro Kaneko             | The IRB of Kameda Medical Center / 929 Higashimachi, Kamogawa, Chiba, 296-0041                | Yuji Hashimoto                                                                                           | 04/09/02                                                | 04/09/02                   | 07/08/03                | 08/02/06                | 04/07/07                |
| 1706 / Kuniaki Seyama              | The IRB of Juntendo University / 3-1-3 Hongo, Bunkyo-ku, Tokyo, 113-8431                      | Ryuzo Kawamori                                                                                           | 08/10/02                                                | 08/10/02                   | 18/09/03                | 14/02/06                | 12/07/07                |

| Japan                              |                                                                                       |                                                                                                        |                                                         |                            |                         |                         |                         |
|------------------------------------|---------------------------------------------------------------------------------------|--------------------------------------------------------------------------------------------------------|---------------------------------------------------------|----------------------------|-------------------------|-------------------------|-------------------------|
| Centre number(s) / Investigator(s) | IRB or IEC (name/address)                                                             | IRB or IEC Chairperson                                                                                 | Informed Consent/Pt. Information Form Approval DD/MM/YY | Protocol Approval DD/MM/YY | Am. 1 Approval DD/MM/YY | Am. 2 Approval DD/MM/YY | Am. 3 Approval DD/MM/YY |
| 1708 / Keishi Kubo                 | The IRB of Shinshu University / 3-1-1 Asahi Matsumoto, Nagano, 390-0802               | Shigeru Omori (22 October 2002); Toshiaki Saida (15 February 2006/ 19 June 2007)                       | 22/10/02                                                | 22/10/02                   | 10/07/03                | 15/02/06                | 19/06/07                |
| 1709 / Hiroyuki Taniguchi          | The IRB of Tosei General Hospital / 160 Nishi-Oiwakecho, Seto, Aichi, 489-0065        | Kazuyoshi Sakai                                                                                        | 25/07/02                                                | 25/07/02                   | 25/07/03                | 27/01/06                | 30/07/07                |
| 1710 / Kazuto Hirata               | The IRB of Osaka City University / 1-5-7 Asahimachi, Abeno-ku, Osaka, Osaka, 545-8586 | Masamitsu Ishii (29 January 2003/ 24 September 2003 22 February 2006); Kunio Shiraki (27 June 2007)    | 29/01/03                                                | 29/01/03                   | 24/09/03                | 22/02/06                | 27/06/07                |
| 1711 / Yuji Tohda                  | The IRB of Kinki University / 377-2 Ohno-higashi, Osakasayama, Osaka, 589-0014        | Harumasa Oyangai (29 July 2002) Masahiro Fukuoka (20 February 2006) Susumu Kusunoki (18 June 2007)     | 29/07/02                                                | 29/07/02                   | 11/08/03                | 20/02/06                | 18/06/07                |
| 1712 / Hisamichi Aizawa            | The IRB of Kurume University Hospital / 67 Asahi-machi, Kurume, Fukuoka, 830-0011     | Takashi Hashimoto                                                                                      | 21/10/02                                                | 21/10/02                   | 18/08/03                | 20/08/06                | 18/06/07                |
| 1713 / Shuichi Matsumoto           | The IRB of Komaki City Hospital / 1-20 Joubushi, Komaki, Aichi, 485-0044              | Tatsuya Kobayashi (12 November 2002) Tsukasa Imaizumi (17 September 2003) Yoshihisa Kida (8 June 2006) | 12/11/02                                                | 12/11/02                   | 17/09/03                | 08/06/06                | 23/05/07                |

**Lithuania**

1.Date of IC/PI - version 1 dated 14 February, 2002 was approved on 10-Jun-2002 - date of approval to conduct biomedical research.  
IC/PI version 2 dated 9 November, 2004 was approved on 03-Mar-05 - this date entered into table

2.

Amendment 1 - was only submitted as information(issue not related to Lithuania)

Amendment 2 - approved

Amendment 3 submitted on 09-May-07. Lithuanian Bioethics Committee this information accepted, approval not needed as there were no changes in IC or PI.

| <b>Centre number(s) / Investigator(s)</b> | <b>IRB or IEC (name/address)</b>                                         | <b>IRB or IEC Chairperson</b> | <b>Informed Consent/Pt. Information Form Approval DD/MM/YY</b> | <b>Protocol Approval DD/MM/YY</b> | <b>Am. 1 Approval DD/MM/YY</b> | <b>Am. 2 Approval DD/MM/YY</b> | <b>Am. 3 Approval DD/MM/YY</b> |
|-------------------------------------------|--------------------------------------------------------------------------|-------------------------------|----------------------------------------------------------------|-----------------------------------|--------------------------------|--------------------------------|--------------------------------|
| 1801 / Raimundas Sakalauskas              | Lithuanian Bioethics Committee<br>Didzioji str. 22,<br>LT 01128, Vilnius | Assoc.prof. E.Gefenas         | 03-Mar-05                                                      | 28-May-02                         | Not for LT                     | 30-Jan-06                      | N/A                            |
| 1802 / Alfredas Bagdouas                  | Lithuanian Bioethics Committee<br>Didzioji str. 22,<br>LT 01128, Vilnius | Assoc.prof. E.Gefenas         | 03-Mar-05                                                      | 28-May-02                         | Not for LT                     | 30-Jan-06                      | N/A                            |
| 1803 / Remigijus V. Nargela               | Lithuanian Bioethics Committee<br>Didzioji str. 22,<br>LT 01128, Vilnius | Assoc.prof. E.Gefenas         | 03-Mar-05                                                      | 28-May-02                         | Not for LT                     | 30-Jan-06                      | N/A                            |



**Malaysia**

| <b>Centre number(s) / Investigator(s)</b> | <b>IRB or IEC (name/address)</b>                                                                                                                | <b>IRB or IEC Chairperson</b> | <b>Informed Consent/Pt. Information Form Approval DD/MM/YY</b> | <b>Protocol Approval DD/MM/YY</b> | <b>Am. 1 Approval DD/MM/YY</b> | <b>Am. 2 Approval DD/MM/YY</b> | <b>Am. 3 Approval DD/MM/YY</b> |
|-------------------------------------------|-------------------------------------------------------------------------------------------------------------------------------------------------|-------------------------------|----------------------------------------------------------------|-----------------------------------|--------------------------------|--------------------------------|--------------------------------|
| 1901 / Aziah Ahmad Mahiyidin              | Medical Research Ethics Committee<br>Ministry of Health<br>C/o Institute for Medical Research<br>Jalan Pahang<br>50588 Kuala Lumpur<br>Malaysia | Mr Noor Hisham Abdullah       | 23 Oct 2002                                                    | 23 Oct 2002                       | 28 Aug 2006                    | 28 Aug 2006                    | 24 May 2007                    |
| 1902 / Roslan Harun                       | Research Ethics Committee<br>Faculty of Medicine<br>University Kebangsaan Malaysia<br>Jalan Yaacob Latif<br>56000 Cheras<br>Kuala Lumpur        | Prof. Dr. Raymond Azman Ali   | 02 Dec 2002                                                    | 02 Dec 2002                       | 22 Aug 2006                    | 22 Aug 2006                    | 11 Jul 2007                    |
| 1903 / Liam Chong Kim                     | Medical Ethics Committee<br>University of Malaya<br>Medical Centre<br>Lembah Pantai<br>59100 Kuala Lumpur<br>Malaysia                           | Prof Looi Lai Meng            | 25 Sep 2002                                                    | 25 Sep 2002                       | 16 Aug 2006                    | 16 Aug 2006                    | 25 Jul 2007                    |

| Mexico                             |                                                                                                                                    |                                                                                  |                                                         |                            |                         |                         |                         |
|------------------------------------|------------------------------------------------------------------------------------------------------------------------------------|----------------------------------------------------------------------------------|---------------------------------------------------------|----------------------------|-------------------------|-------------------------|-------------------------|
| Centre number(s) / Investigator(s) | IRB or IEC (name/address)                                                                                                          | IRB or IEC Chairperson                                                           | Informed Consent/Pt. Information Form Approval DD/MM/YY | Protocol Approval DD/MM/YY | Am. 1 Approval DD/MM/YY | Am. 2 Approval DD/MM/YY | Am. 3 Approval DD/MM/YY |
| 2002 / Raúl Ortiz Peregrina        | IRB del Hospital Civil Nuevo de Guadalajara Salvador Quevedo y Zubieta # 750 Col Independencia ZC 44340 Guadalajara, Jal           | Salvador Fonseca M.D.                                                            | 17-May-2002                                             | 17-May-2002                | NA                      | 05-Apr-2006             | 11- Jul-2007            |
| 2003 / Javier Díaz Castañón        | IRB del Hospital Angel Leño Av Dr Angel Leño # 500Col. Los Robles ZC 45200 Zapopan, Jal                                            | Victoriano Sáenz Félix, M.D.<br><br>Actual: Bruna Isabella Taboada Mascarín M.D. | 12-Jun-2002                                             | 12-Jun-2002                | NA                      | 28-Feb-2006             | 25-Jun-07               |
| 2004 / Rodolfo Posadas Valay       | IRB/IEC del Hospital Universitario de UANL Av Francisco I Madero Pte s/n y Av Gonzalitos Col. Mitras ZC 64460 Monterrey Nuevo León | José Garza Leal, M.D.                                                            | 10-Oct-2002                                             | 10-Oct-2002                | NA                      | 09-Mar-2006             | 01-Jun-2007             |
| 2006 / Raúl Sansores               | IRB INER Calzada de Tlalpan # 4502 Col Sección XVI ZC14080 Mexico City, México                                                     | Guillermo Carvajal Sandoval, M.D.                                                | 02-Jul-2002                                             | 02-Jul-2002                | NA                      | 22-Mar-2006             | 06-Jun-2007             |

| Mexico                             |                                                                                                                      |                                  |                                                         |                            |                         |                         |                         |
|------------------------------------|----------------------------------------------------------------------------------------------------------------------|----------------------------------|---------------------------------------------------------|----------------------------|-------------------------|-------------------------|-------------------------|
| Centre number(s) / Investigator(s) | IRB or IEC (name/address)                                                                                            | IRB or IEC Chairperson           | Informed Consent/Pt. Information Form Approval DD/MM/YY | Protocol Approval DD/MM/YY | Am. 1 Approval DD/MM/YY | Am. 2 Approval DD/MM/YY | Am. 3 Approval DD/MM/YY |
| 2009 / Alfredo Domínguez Peregrina | IRB Hospital UPAEP<br>5 Poniente #175 col<br>Centro ZC 72000<br>Puebla, Pueb                                         | Lorena de la Calleja, M.D.       | 01-Jul-2002                                             | 01-Jul-2002                | NA                      | 18-May-2006             | 16-Jun-2007             |
| 2010 / Héctor Ocaña Servín         | IRB de la Universidad Autónoma del Estado de México<br>Ixtacihuatl # 297 Col.<br>Xuiautecal Toluca,<br>Edo de México | José María Pérez Aviles,<br>M.D. | 14-Aug-2002                                             | 14-Aug-2002                | NA                      | ND                      | ND                      |

**Netherlands**

| <b>Centre number(s) / Investigator(s)</b>  | <b>IRB or IEC (name/address)</b>                                                                        | <b>IRB or IEC Chairperson</b> | <b>Informed Consent/Pt. Information Form Approval DD/MM/YY</b> | <b>Protocol Approval DD/MM/YY</b> | <b>Am. 1 Approval DD/MM/YY</b> | <b>Am. 2 Approval DD/MM/YY</b> | <b>Am. 3 Approval DD/MM/YY</b> |
|--------------------------------------------|---------------------------------------------------------------------------------------------------------|-------------------------------|----------------------------------------------------------------|-----------------------------------|--------------------------------|--------------------------------|--------------------------------|
| Central approval for all sites (2101-2115) | Medisch Ethische Toetsingscommissie Atrium MC – Maaslandziekenhuis Henri Dunantstraat 5 6419 PC HEERLEN | G. Blaauw                     | same                                                           | 08-Aug-02                         | 29-Jul-03                      | 25-Jan-06                      | 29-May-07                      |
| 2101 / Jan van Noord                       | Raad van Bestuur Atrium medisch centrum Henri Dunantstraat 5 6419 PC HEERLEN                            | Dr. Ir. J.W.J. van Wersch     | same                                                           | 15-Oct-02                         | Not Applicable*                | Not Applicable*                | Not Applicable*                |
| 2102 / R. Aalbers                          | Medisch Ethische Toetsingscommissie Atrium MC – Maaslandziekenhuis Henri Dunantstraat 5 6419 PC HEERLEN | G. Blaauw                     | same                                                           | 04-Sep-02                         | Not Applicable*                | Not Applicable*                | Not Applicable*                |
| 2104 / J.P.H.M. Creemers                   | Medisch Ethische Toetsingscommissie Atrium MC – Maaslandziekenhuis Henri Dunantstraat 5 6419 PC HEERLEN | G. Blaauw                     | same                                                           | 08-Aug-02                         | Not Applicable*                | Not Applicable*                | Not Applicable*                |
| 2105 / W. Dalinghaus                       | Medisch Ethische Toetsingscommissie Atrium MC – Maaslandziekenhuis Henri Dunantstraat 5 6419 PC HEERLEN | G. Blaauw                     | same                                                           | 17-Oct-02                         | Not Applicable*                | Not Applicable*                | Not Applicable*                |
| 2106 / M. Eland                            | Medisch Ethische Toetsingscommissie Atrium MC – Maaslandziekenhuis Henri Dunantstraat 5 6419 PC HEERLEN | G. Blaauw                     | same                                                           | 17-Oct-02                         | Not Applicable*                | Not Applicable*                | Not Applicable*                |
| 2107 / B.J.M. Pannekoek                    | Medisch Ethische Toetsingscommissie Atrium MC – Maaslandziekenhuis                                      | G. Blaauw                     | same                                                           | 08-Aug-02                         | Not Applicable*                | Not Applicable*                | Not Applicable*                |

**Netherlands**

| <b>Centre number(s) / Investigator(s)</b> | <b>IRB or IEC (name/address)</b>                                                                              | <b>IRB or IEC Chairperson</b> | <b>Informed Consent/Pt. Information Form Approval DD/MM/YY</b> | <b>Protocol Approval DD/MM/YY</b> | <b>Am. 1 Approval DD/MM/YY</b> | <b>Am. 2 Approval DD/MM/YY</b> | <b>Am. 3 Approval DD/MM/YY</b> |
|-------------------------------------------|---------------------------------------------------------------------------------------------------------------|-------------------------------|----------------------------------------------------------------|-----------------------------------|--------------------------------|--------------------------------|--------------------------------|
|                                           | Henri Dunantstraat 5<br>6419 PC HEERLEN                                                                       |                               |                                                                |                                   |                                |                                |                                |
| 2108 / H.R. Pasma                         | Medisch Ethische Toetsingscommissie Atrium MC – Maaslandziekenhuis<br>Henri Dunantstraat 5<br>6419 PC HEERLEN | G. Blaauw                     | same                                                           | 08-Aug-02                         | Not Applicable*                | Not Applicable*                | Not Applicable*                |
| 2109 / A. Rudolphus                       | Medisch Ethische Toetsingscommissie Atrium MC – Maaslandziekenhuis<br>Henri Dunantstraat 5<br>6419 PC HEERLEN | G. Blaauw                     | same                                                           | 18-Dec-02                         | Not Applicable*                | Not Applicable*                | Not Applicable*                |
| 2110 / H.E.J. Sinn. Damsté                | Medisch Ethische Toetsingscommissie Atrium MC – Maaslandziekenhuis<br>Henri Dunantstraat 5<br>6419 PC HEERLEN | G. Blaauw                     | same                                                           | 20-Jan-03                         | Not Applicable*                | Not Applicable*                | Not Applicable*                |
| 2111/ W.B.M. Evers                        | Medisch Ethische Toetsingscommissie Atrium MC – Maaslandziekenhuis<br>Henri Dunantstraat 5<br>6419 PC HEERLEN | G. Blaauw                     | same                                                           | 08-Aug-02                         | Not Applicable*                | Not Applicable*                | Not Applicable*                |
| 2112 / S.J.M. Gans                        | Medisch Ethische Toetsingscommissie Atrium MC – Maaslandziekenhuis<br>Henri Dunantstraat 5<br>6419 PC HEERLEN | G. Blaauw                     | same                                                           | 17-Oct-02                         | Not Applicable*                | Not Applicable*                | Not Applicable*                |
| 2114 / Hans Timmer                        | Medisch Ethische Toetsingscommissie Atrium MC – Maaslandziekenhuis<br>Henri Dunantstraat 5                    | G. Blaauw                     | same                                                           | 09-Jan-03                         | Not Applicable*                | Not Applicable*                | Not Applicable*                |

| Netherlands                        |                                                                                                         |                        |                                                         |                            |                         |                         |                         |
|------------------------------------|---------------------------------------------------------------------------------------------------------|------------------------|---------------------------------------------------------|----------------------------|-------------------------|-------------------------|-------------------------|
| Centre number(s) / Investigator(s) | IRB or IEC (name/address)                                                                               | IRB or IEC Chairperson | Informed Consent/Pt. Information Form Approval DD/MM/YY | Protocol Approval DD/MM/YY | Am. 1 Approval DD/MM/YY | Am. 2 Approval DD/MM/YY | Am. 3 Approval DD/MM/YY |
|                                    | 6419 PC HEERLEN                                                                                         |                        |                                                         |                            |                         |                         |                         |
| 2115 / J. Westbroek                | Medisch Ethische Toetsingscommissie Atrium MC – Maaslandziekenhuis Henri Dunantstraat 5 6419 PC HEERLEN | G. Blaauw              | same                                                    | 17-Oct-02                  | Not Applicable*         | Not Applicable*         | Not Applicable*         |

**New Zealand**

| Centre number(s) / Investigator(s) | IRB or IEC (name/address)     | IRB or IEC Chairperson | Informed Consent/Pt. Information Form Approval DD/MM/YY | Protocol Approval DD/MM/YY | Am. 1 Approval DD/MM/YY | Am. 2 Approval DD/MM/YY | Am. 3 Approval DD/MM/YY |
|------------------------------------|-------------------------------|------------------------|---------------------------------------------------------|----------------------------|-------------------------|-------------------------|-------------------------|
| 211 / Peter Black                  | Multi-Region Ethics Committee | Nicole Presland        | 16Jan2003                                               | 16Jan2003                  | 30Jul2003               | 08Feb2006               | 30May2007               |
| 212 / Michael Epton                | Multi-Region Ethics Committee | Nicole Presland        | 16Jan2003                                               | 16Jan2003                  | 30Jul2003               | 08Feb2006               | 30May2007               |

| Norway                             |                                                                                 |                        |                                                         |                            |                         |                         |                                             |
|------------------------------------|---------------------------------------------------------------------------------|------------------------|---------------------------------------------------------|----------------------------|-------------------------|-------------------------|---------------------------------------------|
| Centre number(s) / Investigator(s) | IRB or IEC (name/address)                                                       | IRB or IEC Chairperson | Informed Consent/Pt. Information Form Approval DD/MM/YY | Protocol Approval DD/MM/YY | Am. 1 Approval DD/MM/YY | Am. 2 Approval DD/MM/YY | Am. 3 Approval DD/MM/YY                     |
| 2201 / Ragnar Dahle                | Regional komite for medisinsk forskningsetikk Postboks 1130, Blindern 0318 OSLO | Knut Engedal           | 10/09/02                                                | 10/09/02                   | NA                      | 19/12/05                | No approval only send as information to IRB |
| 2202 / Arne Eivindson              | Regional komite for medisinsk forskningsetikk Postboks 1130, Blindern 0318 OSLO | Knut Engedal           | 10/09/02                                                | 10/09/02                   | NA                      | 19/12/05                | No approval only send as information to IRB |
| 2204 / Jostein Asmervik            | Regional komite for medisinsk forskningsetikk Postboks 1130, Blindern 0318 OSLO | Knut Engedal           | 10/09/02                                                | 10/09/02                   | NA                      | 19/12/05                | No approval only send as information to IRB |
| 2205 / Per Arve Lier               | Regional komite for medisinsk forskningsetikk Postboks 1130, Blindern 0318 OSLO | Knut Engedal           | 10/09/02                                                | 10/09/02                   | NA                      | 19/12/05                | No approval only send as information to IRB |



**Philippines**

| <b>Centre number(s) / Investigator(s)</b> | <b>IRB or IEC (name/address)</b>                                                                                                         | <b>IRB or IEC Chairperson</b>      | <b>Informed Consent/Pt. Information Form Approval DD/MM/YY</b> | <b>Protocol Approval DD/MM/YY</b> | <b>Am. 1 Approval DD/MM/YY (FYI only)</b> | <b>Am. 2 Approval DD/MM/YY</b> | <b>Am. 3 Approval DD/MM/YY</b> |
|-------------------------------------------|------------------------------------------------------------------------------------------------------------------------------------------|------------------------------------|----------------------------------------------------------------|-----------------------------------|-------------------------------------------|--------------------------------|--------------------------------|
| 2301 / Lenora Canizares-Fernandez         | Research Implementation and Development Office<br>UP-College of Medicine<br>Philippine General Hospital<br>Taft Avenue, Ermita<br>Manila | Evangeline O. Santos, MD           | 16-Jan-03                                                      | 16-Jan-03                         | 24-Jul-03                                 | 08-Mar-06                      | 11-May-07                      |
| 2302 / Dr. Aileen Guzman                  | Ethics Committee<br>Philippine Heart Center<br>East Avenue, Quezon City                                                                  | Noe A. Babilonia, MD               | 18-Jul-02                                                      | 18-Jul-02                         | 23-Jul-03                                 | 09-Mar-06                      | 04-May-07                      |
| 2303 / Teresita Aquino                    | Research and Ethics Committee<br>Veterans Memorial medical Center<br>North Avenue, Quezon City                                           | Emerita A. Barrenechea, MD         | 17-Jun-02                                                      | 17-Jun-02                         | 23-Jul-03                                 | 08-Mar-06                      | 10-May-07                      |
| 2304 / Sullian Sy-Naval                   | Ethics Review Committee<br>Lung Center of the Philippines<br>East Avenue, Quezon City                                                    | Fr. Efren B. Ballistoy, OSC        | 26-Jun-02                                                      | 26-Jun-02                         | 01-Sep-03                                 | 08-Mar-06                      | 15-May-07                      |
| 2305 / Tim Trinidad                       | Institutional Review Board<br>University of Santo Tomas Hospital<br>España, Manila                                                       | Ma. Graciela Garayblas-Gonzaga, MD | 12-Feb-02                                                      | 12-Feb-02                         | 05-Jan-04                                 | 08-Mar-06                      | 07-May-07                      |

**Poland**

In section Informed Consent approval I gave a comment that it applies to PIC version 2 dated 09.11.2004 as PIC version 1 dated 14.02.2002 was approved together with main protocol approval - I also added that comment in the section.

The last comment is required for Am 2 approval - that date applies also to the PIC for long term follow-up approval, which was also applicable in Poland.

The site 2403 was closed soon after the opening so that they have only main protocol approval.

| <b>Centre number(s) / Investigator(s)</b> | <b>IRB or IEC (name/address)</b>                                                                       | <b>IRB or IEC Chairperson</b>                                                  | <b>Informed Consent/Pt. Information Form Approval DD/MM/YY</b> | <b>Protocol Approval DD/MM/YY</b> | <b>Am. 1 Approval DD/MM/YY</b> | <b>Am. 2 Approval DD/MM/YY</b> | <b>Am. 3 Approval DD/MM/YY</b> |
|-------------------------------------------|--------------------------------------------------------------------------------------------------------|--------------------------------------------------------------------------------|----------------------------------------------------------------|-----------------------------------|--------------------------------|--------------------------------|--------------------------------|
| 2401 / Prof. Dorota Górecka               | Komisja Bioetyczna<br>Przy Instytucie<br>Gruźlicy i Chorób<br>Płuc<br>Ul. Płocka 26<br>01-138 Warszawa | Prof. Dr hab. JAN KUŚ                                                          | 20/06/05                                                       | 02/10/02                          | 25/09/03                       | 16/01/06                       | 20/06/07                       |
| 2402 / Tadeusz Plusa                      | Komisja Bioetyczna<br>Przy Wojskowej Izbie<br>Lekarskiej<br>Ul. Koszykowa 78<br>00-909 Warszawa        | 1. Prof. Dr hab. DARIUSZ<br>JURKIEWICZ<br>2. Prof. Dr hab.<br>EUGENIUSZ DZIUK  | 24/05/05                                                       | 18/09/02                          | 22/10/03                       | 27/01/06                       | 15/06/07                       |
| 2403 / Michal Pirozunski                  | Komisja Bioetyczna<br>CMKP Ul.<br>Marymoncka 99,<br>Warszawa                                           | Prof. Dr hab. EWA<br>MARCINOWSKA-<br>SUCHOWIERSKA                              | Site closed – no<br>patient                                    | 04/09/02                          | NA                             | NA                             | NA                             |
| 2404 / Prof. Ewa Pisarczyk-Bogacka        | Komisja Bioetyczna<br>Przy Akademii<br>Medycznej<br>Ul. Pasteura 1<br>50-367 Wrocław                   | 1. Prof. Dr hab.<br>FRANCISZEK<br>IWAŃCZAK<br>2. Prof. Dr hab. JAN<br>KORNAFEL | 09/06/05                                                       | 10/10/02                          | 17/10/03                       | 12/01/06                       | 29/06/07                       |
| 2405 / Pawel Gorski                       | Komisja Bioetyki<br>Uniwersytetu<br>Medycznego w Łodzi<br>Al. Kościuszki 4<br>90-419 Łódź              | Prof. Dr hab.<br>PRZEDZISŁAW<br>POLAKOWSKI                                     | 14/06/05                                                       | 07/10/02                          | 23/09/03                       | 17/01/06                       | 26/06/07                       |

**Poland**

In section Informed Consent approval I gave a comment that it applies to PIC version 2 dated 09.11.2004 as PIC version 1 dated 14.02.2002 was approved together with main protocol approval - I also added that comment in the section.

The last comment is required for Am 2 approval - that date applies also to the PIC for long term follow-up approval, which was also applicable in Poland.

The site 2403 was closed soon after the opening so that they have only main protocol approval.

| <b>Centre number(s) / Investigator(s)</b> | <b>IRB or IEC (name/address)</b>                                                                                           | <b>IRB or IEC Chairperson</b>    | <b>Informed Consent/Pt. Information Form Approval DD/MM/YY</b> | <b>Protocol Approval DD/MM/YY</b> | <b>Am. 1 Approval DD/MM/YY</b> | <b>Am. 2 Approval DD/MM/YY</b> | <b>Am. 3 Approval DD/MM/YY</b> |
|-------------------------------------------|----------------------------------------------------------------------------------------------------------------------------|----------------------------------|----------------------------------------------------------------|-----------------------------------|--------------------------------|--------------------------------|--------------------------------|
|                                           |                                                                                                                            |                                  |                                                                |                                   |                                |                                |                                |
| 2406 / Jerzy Kozielski                    | Komisja Bioetyczna<br>Kraków,<br>23.01.2008<br>Przy Śląskiej<br>Akademii Medycznej<br>Ul. Warszawska 14<br>40-006 Katowice | Prof. Dr hab. STEFAN<br>KOSSMANN | 08/06/05                                                       | 25/09/02                          | 20/11/03                       | 26/01/06                       | 20/06/07                       |
| 2407 / Wladyslaw Pierzchala               | Komisja Bioetyczna<br>Kraków,<br>23.01.2008<br>Przy Śląskiej<br>Akademii Medycznej<br>Ul. Warszawska 14<br>40-006 Katowice | Prof. Dr hab. STEFAN<br>KOSSMANN | 08/06/05                                                       | 25/09/02                          | 20/11/03                       | 24/01/06                       | 20/06/07                       |
| 2408 / Andrzej Szczeklik                  | Komisja Bioetyczna<br>Kraków,<br>23.01.2008<br>Uniwersytetu<br>Jagiellońskiego<br>Ul. Jagiellońska 10<br>31-010 Kraków     | Prof. Dr hab. PIOTR THOR         | 23/06/05                                                       | 24/10/02                          | 25/09/03                       | 12/01/06                       | 28/06/07                       |

**Poland**

In section Informed Consent approval I gave a comment that it applies to PIC version 2 dated 09.11.2004 as PIC version 1 dated 14.02.2002 was approved together with main protocol approval - I also added that comment in the section.

The last comment is required for Am 2 approval - that date applies also to the PIC for long term follow-up approval, which was also applicable in Poland.

The site 2403 was closed soon after the opening so that they have only main protocol approval.

| <b>Centre number(s) / Investigator(s)</b> | <b>IRB or IEC (name/address)</b>                                                                                                                                                       | <b>IRB or IEC Chairperson</b>              | <b>Informed Consent/Pt. Information Form Approval DD/MM/YY</b> | <b>Protocol Approval DD/MM/YY</b> | <b>Am. 1 Approval DD/MM/YY</b> | <b>Am. 2 Approval DD/MM/YY</b> | <b>Am. 3 Approval DD/MM/YY</b> |
|-------------------------------------------|----------------------------------------------------------------------------------------------------------------------------------------------------------------------------------------|--------------------------------------------|----------------------------------------------------------------|-----------------------------------|--------------------------------|--------------------------------|--------------------------------|
| 2409 / Piotr Kuna                         | Komisja Bioetyki<br>Uniwersytetu<br>Medycznego w Łodzi<br>Al. Kościuszki 4<br>90-419 Łódź                                                                                              | Prof. Dr hab.<br>PRZEDZISŁAW<br>POLAKOWSKI | 14/06/05                                                       | 03/09/02                          | 23/09/03                       | 17/01/06                       | 26/06/07                       |
| 2410 / Jan Marek Słominski                | Niezależna Komisja<br>Bioetyczna, Kraków,<br>23.01.2008<br>d/s Badań<br>Naukowych<br>Przy Akademii<br>Medycznej w<br>Gdańsku<br>Ul. Marii<br>Sklódowskiej-Curie<br>3A<br>80-210 Gdańsk | Prof. Dr hab. STEFAN<br>RASZEJA            | 30/06/05                                                       | 19/09/02                          | 03/10/03                       | 14/02/06                       | 09/07/07                       |

**Portugal**

| <b>Centre number(s) / Investigator(s)</b> | <b>IRB or IEC (name/address)</b>                                                           | <b>IRB or IEC Chairperson</b> | <b>Informed Consent/Pt. Information Form Approval DD/MM/YY</b> | <b>Protocol Approval DD/MM/YY</b> | <b>Am. 1 Approval DD/MM/YY *</b> | <b>Am. 2 Approval DD/MM/YY **</b> | <b>Am. 3 Approval DD/MM/YY **</b> |
|-------------------------------------------|--------------------------------------------------------------------------------------------|-------------------------------|----------------------------------------------------------------|-----------------------------------|----------------------------------|-----------------------------------|-----------------------------------|
| 2501 / João Almeida                       | Comissão de Ética do<br>Hospital de S. João<br>Av. Prof. Hernâni<br>Monteiro<br>4200 Porto | Dr. Filipe Nuno Almeida       | 22 APR 02                                                      | 22 APR 02                         | 16 SEP 03                        | 16 FEB 06                         | 22 MAY 07                         |

**Poland**

In section Informed Consent approval I gave a comment that it applies to PIC version 2 dated 09.11.2004 as PIC version 1 dated 14.02.2002 was approved together with main protocol approval - I also added that comment in the section.

The last comment is required for Am 2 approval - that date applies also to the PIC for long term follow-up approval, which was also applicable in Poland.

The site 2403 was closed soon after the opening so that they have only main protocol approval.

| <b>Centre number(s) / Investigator(s)</b> | <b>IRB or IEC (name/address)</b>                                                                                                        | <b>IRB or IEC Chairperson</b> | <b>Informed Consent/Pt. Information Form Approval DD/MM/YY</b> | <b>Protocol Approval DD/MM/YY</b> | <b>Am. 1 Approval DD/MM/YY</b> | <b>Am. 2 Approval DD/MM/YY</b> | <b>Am. 3 Approval DD/MM/YY</b> |
|-------------------------------------------|-----------------------------------------------------------------------------------------------------------------------------------------|-------------------------------|----------------------------------------------------------------|-----------------------------------|--------------------------------|--------------------------------|--------------------------------|
| 2502 / Dr. Raul Sa                        | Comissão de Ética do Centro Hospitalar de Vila Nova de Gaia<br>Rua Conceição Fernandes<br>4434-502 Vila Nova de Gaia                    | Dr. Eurico Teixeira           | 12 JUN 02                                                      | 12 JUN 02                         | 04 SEP 03                      | 16 FEB 06                      | 22 MAY 07                      |
| 2503 / Cristina Bárbara                   | Comissão de Ética do Hospital de Pulido Valente<br>Alameda das Linhas de Torres, 117 - Edifício Rainha D. Amélia, 2º<br>1769-001 Lisboa | Dr. António D'Orey Franco     | 21 AUG 02                                                      | 21 AUG 02                         | 11 MAR 04                      | 16 FEB 06                      | 22 MAY 07                      |
| 2504 / Dr. Joaquim Moita                  | Comissão de Ética do Centro Hospitalar de Coimbra<br>Quinta dos Vales – S. Martinho do Bispo<br>3040-853 Coimbra                        | Dr. João Sarabando Moreira    | 04 JUN 02                                                      | 04 JUN 02                         | 04 SEP 03                      | 16 FEB 06                      | 22 MAY 07                      |
| 2505 / João Cardoso                       | Comissão de Ética do Hospital de Santa Marta<br>Rua de Santa Marta<br>1169-024 Lisboa                                                   | Prof. Dr. José Fragata        | 07 JUN 02                                                      | 07 JUN 02                         | 1 MAR 04                       | 16 FEB 06                      | 22 MAY 07                      |

\* Note: Dates presented are application dates, and not approval dates; approval was not required

\*\* Amendment 2 and 3 were approved by a Central Ethic Committee; Name: Comissão de Ética para a Investigação Clínica; Address: Parque da Saúde de

**Poland**

In section Informed Consent approval I gave a comment that it applies to PIC version 2 dated 09.11.2004 as PIC version 1 dated 14.02.2002 was approved together with main protocol approval - I also added that comment in the section.  
The last comment is required for Am 2 approval - that date applies also to the PIC for long term follow-up approval, which was also applicable in Poland.  
The site 2403 was closed soon after the opening so that they have only main protocol approval.

| <b>Centre number(s) / Investigator(s)</b> | <b>IRB or IEC (name/address)</b> | <b>IRB or IEC Chairperson</b> | <b>Informed Consent/Pt. Information Form Approval DD/MM/YY</b> | <b>Protocol Approval DD/MM/YY</b> | <b>Am. 1 Approval DD/MM/YY</b> | <b>Am. 2 Approval DD/MM/YY</b> | <b>Am. 3 Approval DD/MM/YY</b> |
|-------------------------------------------|----------------------------------|-------------------------------|----------------------------------------------------------------|-----------------------------------|--------------------------------|--------------------------------|--------------------------------|
|-------------------------------------------|----------------------------------|-------------------------------|----------------------------------------------------------------|-----------------------------------|--------------------------------|--------------------------------|--------------------------------|

Lisboa, Av. do Brasil, nº 53 – Pav. 17A, 1749-004 Lisboa; Chairperson: Dr. António Barros Veloso

**Russia**

| <b>Centre number(s) / Investigator(s)</b> | <b>IRB or IEC (name/address)</b>                                                                                                              | <b>IRB or IEC Chairperson</b> | <b>Informed Consent/Pt. Information Form Approval DD/MM/YY</b> | <b>Protocol Approval DD/MM/YY</b> | <b>Am. 1 Approval DD/MM/YY</b> | <b>Am. 2 Approval DD/MM/YY</b> | <b>Am. 3 Approval DD/MM/YY</b> |
|-------------------------------------------|-----------------------------------------------------------------------------------------------------------------------------------------------|-------------------------------|----------------------------------------------------------------|-----------------------------------|--------------------------------|--------------------------------|--------------------------------|
| 2601 / Alexander G. Chuchalin             | Ethical Committee at the Federal Department of Drug Quality, Efficacy and Safety Control / 1 kor., 8, Petrovsky blvd., 103051, Moscow, Russia | Prof. F.I.Komarov             | 21-05-02                                                       | 24-09-03                          | 26-12-05                       | 05-06-07                       | 02-07-07                       |
| 2602 / Svetlana Ovtcharenko               | Ethical Committee at the Federal Department of Drug Quality, Efficacy and Safety Control / 1 kor., 8, Petrovsky blvd., 103051, Moscow, Russia | Prof. F.I.Komarov             | 21-05-02                                                       | 24-09-03                          | 26-12-05                       | 05-06-07                       | 29-05-07                       |
| 2603 / Vladimir Nonikov                   | Ethical Committee at the Federal Department of Drug                                                                                           | Prof. F.I.Komarov             | 21-05-02                                                       | 24-09-03                          | 26-12-05                       | 05-06-07                       | 02-07-07                       |

**Poland**

In section Informed Consent approval I gave a comment that it applies to PIC version 2 dated 09.11.2004 as PIC version 1 dated 14.02.2002 was approved together with main protocol approval - I also added that comment in the section.

The last comment is required for Am 2 approval - that date applies also to the PIC for long term follow-up approval, which was also applicable in Poland.

The site 2403 was closed soon after the opening so that they have only main protocol approval.

| <b>Centre number(s) / Investigator(s)</b> | <b>IRB or IEC (name/address)</b>                                                                                                               | <b>IRB or IEC Chairperson</b> | <b>Informed Consent/Pt. Information Form Approval DD/MM/YY</b> | <b>Protocol Approval DD/MM/YY</b> | <b>Am. 1 Approval DD/MM/YY</b> | <b>Am. 2 Approval DD/MM/YY</b> | <b>Am. 3 Approval DD/MM/YY</b> |
|-------------------------------------------|------------------------------------------------------------------------------------------------------------------------------------------------|-------------------------------|----------------------------------------------------------------|-----------------------------------|--------------------------------|--------------------------------|--------------------------------|
|                                           | Quality, Efficacy and Safety Control / 1 kor., 8, Petrovsky blvrd., 103051, Moscow, Russia                                                     |                               |                                                                |                                   |                                |                                |                                |
| 2604 / Mikhail Ilkovich                   | Ethical Committee at the Federal Department of Drug Quality, Efficacy and Safety Control / 1 kor., 8, Petrovsky blvrd., 103051, Moscow, Russia | Prof. F.I.Komarov             | 21-05-02                                                       | 24-09-03                          | 26-12-05                       | 05-06-07                       | 05-07-07                       |
| 2605 / Alla Tsoi                          | Ethical Committee at the Federal Department of Drug Quality, Efficacy and Safety Control / 1 kor., 8, Petrovsky blvrd., 103051, Moscow, Russia | Prof. F.I.Komarov             | 21-05-02                                                       | 24-09-03                          | 26-12-05                       | 05-06-07                       | 30-05-07                       |

**Singapore**

| <b>Centre number(s) / Investigator(s)</b> | <b>IRB or IEC (name/address)</b>                                                                                                                          | <b>IRB or IEC Chairperson</b> | <b>Informed Consent/Pt. Information Form Approval DD/MM/YY</b> | <b>Protocol Approval DD/MM/YY</b> | <b>Am. 1 Approval DD/MM/YY</b> | <b>Am. 2 Approval DD/MM/YY</b> | <b>Am. 3 Approval DD/MM/YY</b> |
|-------------------------------------------|-----------------------------------------------------------------------------------------------------------------------------------------------------------|-------------------------------|----------------------------------------------------------------|-----------------------------------|--------------------------------|--------------------------------|--------------------------------|
| 1904 / Yee Tang Wang                      | National Healthcare Group HQ<br>Domain Specific Review Boards (DSRB)<br>No.6 Commonwealth Lane,<br>GMTI Building,<br>Level 6<br>Singapore 149547          | Dr Goh Boon Cher              | 21 Apr 2003                                                    | 21 Apr 2003                       | 24 Aug 2006                    | 24 Aug 2006                    | 04 Jun 2007                    |
| 1905 / Constance Lo                       | SGH Institutional Review Board<br>Executive Office<br>C/o Medical Board<br>Blk 7 Level 1<br>Singapore General Hospital<br>Outram Road<br>Singapore 169608 | Dr Aw Swee Eng                | 24 Apr 2003                                                    | 24 Apr 2003                       | 14 Aug 2006                    | 14 Aug 2006                    | 23 May 2007                    |
| 1906 / Lim Tow Keang                      | National Healthcare Group HQ<br>Domain Specific Review Boards (DSRB)<br>No.6 Commonwealth Lane,<br>GMTI Building,<br>Level 6<br>Singapore 149547          | Dr Goh Boon Cher              | 21 Apr 2003                                                    | 21 Apr 2003                       | 24 Aug 2006                    | 24 Aug 2006                    | 04 Jun 2007                    |



**Slovakia**

| <b>Centre number(s) / Investigator(s)</b> | <b>IRB or IEC (name/address)</b>                                                                  | <b>IRB or IEChairperson</b> | <b>Informed Consent/Pt. Information Form Approval DD/MM/YY</b> | <b>Protocol Approval DD/MM/YY</b> | <b>Am. 1 Approval DD/MM/YY</b> | <b>Am. 2 Approval DD/MM/YY</b> | <b>Am. 3 Approval DD/MM/YY</b> |
|-------------------------------------------|---------------------------------------------------------------------------------------------------|-----------------------------|----------------------------------------------------------------|-----------------------------------|--------------------------------|--------------------------------|--------------------------------|
| 2701 / Peter Kristufek                    | Eticka komisia<br>NUTaRCH<br>Krajinska cesta 91<br>SK-825 56 Bratislava                           | Karol Virsik                | 24/04/02                                                       | 24/04/02                          | N/A                            | N/A                            | N/A                            |
| 2702 / Ladislav Chovan                    | Eticka komisia<br>NUTaRCH<br>Krajinska cesta 91<br>SK-825 56 Bratislava                           | Karol Virsik                | 24/04/02                                                       | 24/04/02                          | 05/04/04                       | 22/03/06                       | explicit approval not required |
| 2703 / Eva Rozborilova                    | Eticka komisia<br>Jeseniovej LF UK<br>Záborskeho 2<br>SK-036 59 Martin                            | Gabriela Nosalova           | 19/04/02                                                       | 19/04/02                          | 14/10/03                       | 03/01/06                       | explicit approval not required |
| 2704 / Dusan Salat                        | Eticka komisia pri<br>Srobarovom ustave<br>DTaRCh<br>SK-058 01 Dolny Smokovec                     | Tatiana Michnova            | 10/04/02                                                       | 10/04/02                          | 16/12/04                       | 12/01/06                       | explicit approval not required |
| 2705 / Jan Plutinsky                      | Eticka komisia<br>Specializovana nemocnica Sv. Svorada<br>Klastorska 134<br>SK-943 88 Nitra-Zobor | Bohumil Matula              | 05/09/02                                                       | 05/09/02                          | 03/09/03                       | 02/03/06                       | explicit approval not required |

| Slovenia                           |                                                                                                                                                         |                                                |                                                         |                            |                         |                         |                         |
|------------------------------------|---------------------------------------------------------------------------------------------------------------------------------------------------------|------------------------------------------------|---------------------------------------------------------|----------------------------|-------------------------|-------------------------|-------------------------|
| Centre number(s) / Investigator(s) | IRB or IEC (name/address)                                                                                                                               | IRB or IEC Chairperson                         | Informed Consent/Pt. Information Form Approval DD/MM/YY | Protocol Approval DD/MM/YY | Am. 1 Approval DD/MM/YY | Am. 2 Approval DD/MM/YY | Am. 3 Approval DD/MM/YY |
| 2801 / Stanislav Suskovic          | National Medical Ethics Committee<br>University Institute of Clinical Neurophysiology,<br>Medical Center<br>Ljubljana, Zaloška c. 7, SI-1525 Ljubljana  | Prof. Joze Trontelj, DrSc, MD, <i>Chairman</i> | 11/06/2002                                              | 11/06/2002                 | 16/09/2003              | 17/01/2006              | 19/06/2007              |
| 2802 / Mitja Kosnik                | National Medical Ethics Committee<br>University Institute of Clinical Neurophysiology,<br>Medical Center<br>Ljubljana, Zaloška c. 7, SI-1525 Ljubljana  | Prof. Joze Trontelj, DrSc, MD, <i>Chairman</i> | 11/06/2002                                              | 11/06/2002                 | 16/09/2003              | 17/01/2006              | 19/06/2007              |
| 2803 / Matjaz Turel                | National Medical Ethics Committee<br>University Institute of Clinical Neurophysiology,<br>Medical Center<br>Ljubljana, Zaloška c. 7, SI-1525, Ljubljana | Prof. Joze Trontelj, DrSc, MD, <i>Chairman</i> | 11/06/2002                                              | 11/06/2002                 | 16/09/2003              | 17/01/2006              | 19/06/2007              |
| 2804 / Dr. Leopold Rezar           | National Medical Ethics Committee<br>University Institute of Clinical                                                                                   | Prof. Joze Trontelj, DrSc, MD, <i>Chairman</i> | 11/06/2002                                              | 11/06/2002                 | 16/09/2003              | 17/01/2006              | 19/06/2007              |

| Slovenia                           |                                                                                                                                                                       |                                                   |                                                         |                            |                         |                         |                         |
|------------------------------------|-----------------------------------------------------------------------------------------------------------------------------------------------------------------------|---------------------------------------------------|---------------------------------------------------------|----------------------------|-------------------------|-------------------------|-------------------------|
| Centre number(s) / Investigator(s) | IRB or IEC (name/address)                                                                                                                                             | IRB or IEC Chairperson                            | Informed Consent/Pt. Information Form Approval DD/MM/YY | Protocol Approval DD/MM/YY | Am. 1 Approval DD/MM/YY | Am. 2 Approval DD/MM/YY | Am. 3 Approval DD/MM/YY |
|                                    | Neurophysiology,<br>Medical Center<br>Ljubljana, Zaloška c.<br>7,<br>SI-1525 Ljubljana                                                                                |                                                   |                                                         |                            |                         |                         |                         |
| 2805 / Snezana<br>Ulcar-Kostic     | National Medical<br>Ethics Committee<br>University Institute of<br>Clinical<br>Neurophysiology,<br>Medical Center<br>Ljubljana,<br>Zaloška c. 7,<br>SI-1525 Ljubljana | Prof. Jozе Trontelj, DrSc,<br>MD, <i>Chairman</i> | 11/06/2002                                              | 11/06/2002                 | 16/09/2003              | 17/01/2006              | 19/06/2007              |

| South Africa                       |                                           |                        |                                                         |                            |                                |                         |                         |
|------------------------------------|-------------------------------------------|------------------------|---------------------------------------------------------|----------------------------|--------------------------------|-------------------------|-------------------------|
| Centre number(s) / Investigator(s) | IRB or IEC (name/address)                 | IRB or IEC Chairperson | Informed Consent/Pt. Information Form Approval DD/MM/YY | Protocol Approval DD/MM/YY | Am. 1 Approval DD/MM/YY        | Am. 2 Approval DD/MM/YY | Am. 3 Approval DD/MM/YY |
| 2901 / G.J. Ras                    | Pharma-Ethics<br>PO Box 786<br>Irene 0062 | Dr. C. Duvenage        | 30-07-03                                                | 05-06-02                   | Not applicable to South Africa | 12-12-05                | 15-05-07                |
| 2902 / Dr. J.J. du Toit            | Pharma-Ethics<br>PO Box 786<br>Irene 0062 | Dr. C. Duvenage        | 30-07-03                                                | 05-06-02                   | Not applicable to South Africa | 12-12-05                | 15-05-07                |
| 2903 / Leon Herbst                 | Pharma-Ethics<br>PO Box 786<br>Irene 0062 | Dr. C. Duvenage        | 30-07-03                                                | 05-06-02                   | Not applicable to South Africa | 12-12-05                | 15-05-07                |
| 2904 / M. van der Linden           | Pharma-Ethics<br>PO Box 786<br>Irene 0062 | Dr. C. Duvenage        | 30-07-03                                                | 05-06-02                   | Not applicable to South Africa | 12-12-05                | 15-05-07                |
| 2905 / A.M. Nel                    | Pharma-Ethics<br>PO Box 786<br>Irene 0062 | Dr. C. Duvenage        | 30-07-03                                                | 05-06-02                   | Not applicable to South Africa | 12-12-05                | 15-05-07                |
| 2906 / J.J. Jansen                 | Pharma-Ethics<br>PO Box 786<br>Irene 0062 | Dr. C. Duvenage        | 30-07-03                                                | 05-06-02                   | Not applicable to South Africa | 12-12-05                | 15-05-07                |
| 2908 / F.C.J. Bester               | Pharma-Ethics<br>PO Box 786<br>Irene 0062 | Dr. C. Duvenage        | 30-07-03                                                | 05-06-02                   | Not applicable to South Africa | 12-12-05                | 15-05-07                |
| 2909 / H.J.R. Colyn                | Pharma-Ethics<br>PO Box 786<br>Irene 0062 | Dr. C. Duvenage        | 30-07-03                                                | 05-06-02                   | Not applicable to South Africa | 12-12-05                | 15-05-07                |
| 2910 / Ismail Abdullah             | Pharma-Ethics<br>PO Box 786<br>Irene 0062 | Dr. C. Duvenage        | 30-07-03                                                | 05-06-02                   | Not applicable to South Africa | 12-12-05                | 15-05-07                |

**South Africa**

| <b>Centre number(s) / Investigator(s)</b> | <b>IRB or IEC (name/address)</b>                                            | <b>IRB or IEC Chairperson</b> | <b>Informed Consent/Pt. Information Form Approval DD/MM/YY</b> | <b>Protocol Approval DD/MM/YY</b> | <b>Am. 1 Approval DD/MM/YY</b> | <b>Am. 2 Approval DD/MM/YY</b> | <b>Am. 3 Approval DD/MM/YY</b> |
|-------------------------------------------|-----------------------------------------------------------------------------|-------------------------------|----------------------------------------------------------------|-----------------------------------|--------------------------------|--------------------------------|--------------------------------|
| 2911 / Ismail Aboobaker Abdullah          | Pharma-Ethics<br>PO Box 786<br>Irene 0062                                   | Dr. C. Duvenage               | 30-07-03                                                       | 05-06-02                          | Not applicable to South Africa | 12-12-05                       | 15-05-07                       |
| 2912 / Eric Bateman                       | UCT Research Ethics Committee<br>Groote Schuur Hospital<br>Observatory 7925 | Prof. M. Blockman             | 30-07-03                                                       | 02-11-02                          | Not applicable to South Africa | 19-12-05                       | 08-06-07                       |

## Spain

| Centre number(s) / Investigator(s) | IRB or IEC (name/address)                                                                                            | IRB or IEC Chairperson                              | Protocol Approval DD/MM/YY | Am. 1 Submission DD/MM/YY        | Informed Consent/Pt. Information form (IB vers. 12) Approval DD/MM/YY | Am. 2 Approval DD/MM/YY | Informed Consent/Pt. Information form (IB vers. 13) Approval DD/MM/YY | Am. 3 Submission DD/MM/YY        |
|------------------------------------|----------------------------------------------------------------------------------------------------------------------|-----------------------------------------------------|----------------------------|----------------------------------|-----------------------------------------------------------------------|-------------------------|-----------------------------------------------------------------------|----------------------------------|
| 3001 / Josep Lluís Heredia Budó    | Hospital Mutua de Terrasa<br>Secretaría del CEIC<br>Plaza Dr. Robert, 5<br>08221 Terrasa                             | Susana Redondo                                      | 31/07/02                   | 09/07/03                         | 01/02/05                                                              | 01/02/06                | 28/07/06                                                              | 29/06/07                         |
| 3002 / Julio Marin Pardo           | Hospital Clínico Universitario de Valencia<br>Secretaría del CEIC<br>Avda. Blasco Ibañez, 17<br>46010 Valencia       | Manuel Labios                                       | 02/08/02                   | 09/07/03<br>24/07/03<br>Approval | 26/01/05                                                              | 25/01/06                | 26/07/06                                                              | 29/06/07                         |
| 3003 / Marc Miravittles            | Hospital Clínico<br>Comité Ético de Investigación Clínica<br>C/ Villaroel, 170<br>08036- Barcelona                   | Begoña Gómez                                        | 07/10/02                   | 09/07/03                         | 14/01/05                                                              | 03/01/06                | 07/09/06                                                              | 29/06/07                         |
| 3004 / José Luis Izquierdo Alonso  | Hospital General Universitario de Guadalajara<br>Secretaría del CEIC<br>Donantes de Sangre, s/n<br>19002 Guadalajara | José Antonio Piqueras                               | 24/07/02                   | 09/07/03                         | 27/01/05                                                              | 27/01/06                | 14/07/06                                                              | 29/06/07<br>11/07/07<br>Approval |
| 3005 / Pascual Val Adán            | Hospital General San Jorge de Huesca,<br>Secretaría del CEIC,<br>Avda. Martínez de Velasco, 36; 22004<br>Huesca      | Miguel Ángel Domínguez<br><br>María González Hinjos | 06/11/02                   | 09/07/03                         | 11/02/05                                                              | 27/01/06                | 28/07/06                                                              | 29/06/07                         |

| Spain                              |                                                                                                                                                                                                        |                        |                            |                                  |                                                                       |                         |                                                                       |                           |
|------------------------------------|--------------------------------------------------------------------------------------------------------------------------------------------------------------------------------------------------------|------------------------|----------------------------|----------------------------------|-----------------------------------------------------------------------|-------------------------|-----------------------------------------------------------------------|---------------------------|
| Centre number(s) / Investigator(s) | IRB or IEC (name/address)                                                                                                                                                                              | IRB or IEC Chairperson | Protocol Approval DD/MM/YY | Am. 1 Submission DD/MM/YY        | Informed Consent/Pt. Information form (IB vers. 12) Approval DD/MM/YY | Am. 2 Approval DD/MM/YY | Informed Consent/Pt. Information form (IB vers. 13) Approval DD/MM/YY | Am. 3 Submission DD/MM/YY |
|                                    | Comité Ético de Investigación Clínica de Aragón (CEICA)<br>Avda. Gómez Laguna, 25<br>- Planta 9ª<br>50009 Zaragoza                                                                                     |                        |                            |                                  |                                                                       |                         |                                                                       |                           |
| 3006 / Josep Morera Prat           | Hospital Universitario Germans Trias i Pujol<br>Secretaría del CEIC<br>Crtra. del Canyet, s/n<br>08916 Badalona                                                                                        | Ángels Fortes          | 25/10/02                   | 09/07/03                         | 25/02/05                                                              | 19/01/06                | 13/07/06                                                              | 29/06/07                  |
| 3008 / Jaume Ferrer                | Hospital General Universitari Vall d'Hebrón<br>Secretaría del CEIC<br>Passeig de la Vall d'Hebron, 119<br>08035 Barcelona                                                                              | José Bruno Montero     | 13/11/02                   | 09/07/03<br>30/09/03<br>Approval | 31/01/05                                                              | 30/01/06                | 31/07/06                                                              | 29/06/07                  |
| 3009 / José Luis Alvarez-Sala      | CEIC regional de la comunidad de Madrid<br>Servicio de Regulación Sanitaria-Unidad de Bioética Viceconsejería de Ordenación Sanitaria y Salud Pública<br>C/ La Aduana, 29<br>3ª planta<br>28013 Madrid | Jesús Iñigo Martínez   | 29/11/02                   | 09/07/03                         | 11/02/05                                                              | 14/02/06                | 02/08/06                                                              | 29/06/07                  |

| Spain                              |                                                                                                                                                                                                       |                        |                            |                           |                                                                       |                                      |                                                                       |                                      |
|------------------------------------|-------------------------------------------------------------------------------------------------------------------------------------------------------------------------------------------------------|------------------------|----------------------------|---------------------------|-----------------------------------------------------------------------|--------------------------------------|-----------------------------------------------------------------------|--------------------------------------|
| Centre number(s) / Investigator(s) | IRB or IEC (name/address)                                                                                                                                                                             | IRB or IEC Chairperson | Protocol Approval DD/MM/YY | Am. 1 Submission DD/MM/YY | Informed Consent/Pt. Information form (IB vers. 12) Approval DD/MM/YY | Am. 2 Approval DD/MM/YY              | Informed Consent/Pt. Information form (IB vers. 13) Approval DD/MM/YY | Am. 3 Submission DD/MM/YY            |
| 3010 / Jesús Fernández Francés     | CEIC regional de la comunidad de Madrid<br>Servicio de Regulación Sanitaria-Unidad de Bioética Viceconsejería de Ordenación Sanitaria y Salud Publica<br>C/ La Aduana, 29<br>3ªplanta<br>28013 Madrid | Jesús Iñigo Martínez   | 29/11/02                   | 09/07/03                  | NA<br>Site closed-out on<br>23/09/04                                  | NA<br>Site closed-out on<br>23/09/04 | NA<br>Site closed-out on<br>23/09/04                                  | NA<br>Site closed-out on<br>23/09/04 |
| 3011 / Fernando Fuentes Otero      | Complejo Hospitalario Infanta Cristina<br>Secretaría del CEIC<br>Ctra. De Elvas, s/n<br>06080 Badajoz                                                                                                 | Julio Benitez          | 25/09/02                   | 09/07/03                  | 19/01/05                                                              | 23/03/06                             | 02/10/06                                                              | 29/06/07                             |
| 3013 / Mª José Ferreiro Álvarez    | CEIC regional de la comunidad de Madrid<br>Servicio de Regulación Sanitaria-Unidad de Bioética Viceconsejería de Ordenación Sanitaria y Salud Publica<br>C/ La Aduana, 29<br>3ªplanta<br>28013 Madrid | Jesús Iñigo Martínez   | 29/11/02                   | 09/07/03                  | 11/02/05                                                              | 14/02/06                             | 02/08/06                                                              | 29/06/07                             |
| 3014 / Héctor Vereá                | CEIC Sergas<br>Edificio de la Conselleria de Sanidad<br>San Lázaro, s/n<br>15703 Santiago de                                                                                                          | Maragarita Tasende     | 12/11/02                   | 09/07/03                  | 28/01/05                                                              | 07/02/06                             | 28/07/06                                                              | 29/06/07                             |



| Spain                              |                                                                                                                                                                                                       |                        |                            |                           |                                                                       |                         |                                                                       |                           |
|------------------------------------|-------------------------------------------------------------------------------------------------------------------------------------------------------------------------------------------------------|------------------------|----------------------------|---------------------------|-----------------------------------------------------------------------|-------------------------|-----------------------------------------------------------------------|---------------------------|
| Centre number(s) / Investigator(s) | IRB or IEC (name/address)                                                                                                                                                                             | IRB or IEC Chairperson | Protocol Approval DD/MM/YY | Am. 1 Submission DD/MM/YY | Informed Consent/Pt. Information form (IB vers. 12) Approval DD/MM/YY | Am. 2 Approval DD/MM/YY | Informed Consent/Pt. Information form (IB vers. 13) Approval DD/MM/YY | Am. 3 Submission DD/MM/YY |
|                                    | Compostela                                                                                                                                                                                            |                        |                            |                           |                                                                       |                         |                                                                       |                           |
| 3015 / Albert Marín Pérez          | Corporació Sanitària Parc Taulí de Sabadell<br>Secretaría del CEIC<br>Parc Taulí, s/n, 08208 Sabadell                                                                                                 | Coloma Moreno          | 18/11/02                   | 09/07/03                  | 25/01/05                                                              | 31/01/06                | 25/07/06                                                              | 26/06/07                  |
| 3016 / Salvador Hernández Flix     | Hosp. Univer.de Sant Joan de Reus<br>Secretaría del CEIC<br>Sant Joan /sn<br>43201-Reus                                                                                                               | Blai Coll              | 17/10/02                   | 09/07/03                  | 25/02/05                                                              | 26/01/06                | 13/07/06                                                              | 29/06/07                  |
| 3017 / Antonio Sueiro Bendito      | CEIC regional de la comunidad de Madrid<br>Servicio de Regulación Sanitaria-Unidad de Bioética Viceconsejería de Ordenación Sanitaria y Salud Publica<br>C/ La Aduana, 29<br>3ªplanta<br>28013 Madrid | Jesús Iñigo Martínez   | 29/11/02                   | 09/07/03                  | 11/02/05                                                              | 14/02/06                | 02/08/06                                                              | 29/06/07                  |
| 3018 / Rafael Bandrés Gimeno       | CEIC Sergas, Edificio de la Conselleria de Sanidad, San Lázaro, s/n, 15703 Santiago de Compostela                                                                                                     | Margarita Tasende      | 12/11/02                   | 09/07/03                  | 28/01/05                                                              | 07/02/06                | 28/07/06                                                              | 29/06/07                  |

## Spain

| Centre number(s) / Investigator(s)        | IRB or IEC (name/address)                                                                                                                                                                                            | IRB or IEC Chairperson                  | Protocol Approval DD/MM/YY | Am. 1 Submission DD/MM/YY | Informed Consent/Pt. Information form (IB vers. 12) Approval DD/MM/YY | Am. 2 Approval DD/MM/YY | Informed Consent/Pt. Information form (IB vers. 13) Approval DD/MM/YY | Am. 3 Submission DD/MM/YY |
|-------------------------------------------|----------------------------------------------------------------------------------------------------------------------------------------------------------------------------------------------------------------------|-----------------------------------------|----------------------------|---------------------------|-----------------------------------------------------------------------|-------------------------|-----------------------------------------------------------------------|---------------------------|
| 3019 / Antonio Sueiro Bendito             | Hospital Virgen Macarena<br>Secretaría del CEIC<br>Avda. de Fedriani, 3<br>41009 Sevilla<br>CEIC Regional de Andalucía<br>Servicio Andaluz de Salud<br>Consejería de Salud<br>Av. Manuel Siurot,s/n<br>41013-Sevilla | Carlos García Antonio Velázquez         | 20/12/02                   | 09/07/03                  | 09/02/05                                                              | 27/01/06<br>10/02/06    | 22/07/06<br>26/10/06                                                  | 29/06/07                  |
| 3020 / Carlos Villasante Fernández-Montes | CEIC regional de la comunidad de Madrid<br>Servicio de Regulación Sanitaria-Unidad de Bioética Viceconsejería de Ordenación Sanitaria y Salud Publica<br>C/ La Aduana, 29<br>3ªplanta<br>28013 Madrid                | Jesús Iñigo Martínez                    | 29/11/02                   | 16/07/03                  | 11/02/05                                                              | 14/02/06                | 02/08/06                                                              | 29/06/07                  |
| 3021 / Salvador Navas Vazquez             | Hospital de Jerez de la Frontera<br>Secretaría del CEIC<br>Ctra. de Circunvalación ,s/n<br>11407-Jérez de la Frontera<br>CEIC Regional de                                                                            | Asunción Almendral<br>Antonio Velázquez | 07/11/02                   | 09/07/03                  | 18/02/05                                                              | 10/02/06                | 26/10/06                                                              | 29/06/07                  |

## Spain

| Centre number(s) / Investigator(s)                   | IRB or IEC (name/address)                                                                                       | IRB or IEC Chairperson | Protocol Approval DD/MM/YY | Am. 1 Submission DD/MM/YY | Informed Consent/Pt. Information form (IB vers. 12) Approval DD/MM/YY | Am. 2 Approval DD/MM/YY | Informed Consent/Pt. Information form (IB vers. 13) Approval DD/MM/YY | Am. 3 Submission DD/MM/YY |
|------------------------------------------------------|-----------------------------------------------------------------------------------------------------------------|------------------------|----------------------------|---------------------------|-----------------------------------------------------------------------|-------------------------|-----------------------------------------------------------------------|---------------------------|
|                                                      | Andalucía<br>Servicio Andaluz de Salud<br>Consejería de Salud<br>Av. Manuel Siurot,s/n<br>41013-Sevilla         |                        |                            |                           |                                                                       |                         |                                                                       |                           |
| 3022 / Victor Sobradillo Peña / Juan Bautista Galdiz | Hospital de Cruces<br>Plaza de Cruces, s/n<br>48903 Barakaldo                                                   | Amaya Martínez         | 04/12/02                   | 09/07/03                  | 09/02/05                                                              | 25/01/06                | 20/07/06                                                              | 03/07/07                  |
| 3023 / Manuel Rubio Goday                            | Hospital Universitari de Girona Dr. Josep Trueta<br>Secretaría del CEIC<br>Avda. de França, s/n<br>17007 Girona | Blanca Martínez        | 17/12/02                   | 09/07/03                  | 25/01/05                                                              | 01/02/06                | 19/07/06                                                              | 29/06/07                  |
| 3024 / Adolfo Baloiira Villar                        | CEIC Sergas<br>Edificio de la Conselleria de Sanidad<br>San Lázaro, s/n<br>15703 Santiago de Compostela         | Margarita Tesende      | 12/11/02                   | 09/07/03                  | 28/01/05                                                              | 07/02/06                | 28/07/06                                                              | 29/06/07                  |
| 3025 / Rafael Blanquer Olivas                        | Hospital Univeristario Dr. Peset, Secretaría del CEIC<br>Avda. Gaspar Aguilar, 90<br>46017 Valencia             | Eduardo Moreno         | 29/11/02                   | 09/07/03                  | 23/02/05                                                              | 25/01/06                | 26/07/06                                                              | 29/06/07                  |
| 3026 / Dr. Santiago Romero                           | Hospital General Universitario de Alicante<br>Secretaría del CEIC                                               | Elena López Navarro    | 18/12/02                   | 09/07/03                  | 27/04/05                                                              | 31/05/06                | 26/07/06                                                              | 29/06/07                  |

## Spain

| Centre number(s) / Investigator(s) | IRB or IEC (name/address)                                                                                                                                                                                           | IRB or IEC Chairperson              | Protocol Approval DD/MM/YY | Am. 1 Submission DD/MM/YY | Informed Consent/Pt. Information form (IB vers. 12) Approval DD/MM/YY | Am. 2 Approval DD/MM/YY | Informed Consent/Pt. Information form (IB vers. 13) Approval DD/MM/YY | Am. 3 Submission DD/MM/YY |
|------------------------------------|---------------------------------------------------------------------------------------------------------------------------------------------------------------------------------------------------------------------|-------------------------------------|----------------------------|---------------------------|-----------------------------------------------------------------------|-------------------------|-----------------------------------------------------------------------|---------------------------|
| Candeira                           | Pintor Baeza, s/n<br>03010 Alicante                                                                                                                                                                                 |                                     |                            |                           |                                                                       |                         |                                                                       |                           |
| 3027 / Dr. Alvar Agustí            | Complejo Asistencial Son Dureta<br>Secretaría del CEIC<br>C/ Andrea Doria, 55<br>07014 Palma de Mallorca                                                                                                            | Magdalena Salom                     | 30/10/02                   | 09/07/03                  | 23/02/05                                                              | 25/01/06                | 26/07/06                                                              | 29/06/07                  |
| 3028 / Dr. Julio Ancochea          | CEIC regional de la comunidad de Madrid<br>Servicio de Regulación Sanitaria-Unidad de Bioética Viceconsejería de Ordenación Sanitaria y Salud Publica<br>C/ La Aduana, 29<br>3ªplanta, 28013 Madrid                 | Jesús Iñigo                         | 20/11/02                   | 09/07/03                  | 11/02/05                                                              | 14/02/06                | 02/08/06                                                              | 29/06/07                  |
| 3030 / José María Marín Trigo      | Hospital Miguel Servet<br>Secretaría del CEIC<br>Pº Isabel la Católica, 1-2<br>50009 Zaragoza<br>Comité Ético de Investigación Clínica de Aragón (CEICA)<br>Avda. Gómez Laguna, 25<br>- Planta 9ª<br>50009 Zaragoza | Angela Idoipe María González Hinjos | 19/11/02                   | 09/07/03                  | 11/02/05                                                              | 27/01/06                | 28/07/06                                                              | 29/06/07                  |
| 3031 / José Miguel Rodríguez       | CEIC regional de la comunidad de Madrid<br>Servicio de Regulación                                                                                                                                                   | Jesús Iñigo                         | 20/11/02                   | 09/07/03                  | 11/02/05                                                              | 14/02/06                | 02/08/06                                                              | 29/06/07                  |

| Spain                              |                                                                                                                                                                                                                       |                                       |                            |                                 |                                                                       |                         |                                                                       |                           |
|------------------------------------|-----------------------------------------------------------------------------------------------------------------------------------------------------------------------------------------------------------------------|---------------------------------------|----------------------------|---------------------------------|-----------------------------------------------------------------------|-------------------------|-----------------------------------------------------------------------|---------------------------|
| Centre number(s) / Investigator(s) | IRB or IEC (name/address)                                                                                                                                                                                             | IRB or IEC Chairperson                | Protocol Approval DD/MM/YY | Am. 1 Submission DD/MM/YY       | Informed Consent/Pt. Information form (IB vers. 12) Approval DD/MM/YY | Am. 2 Approval DD/MM/YY | Informed Consent/Pt. Information form (IB vers. 13) Approval DD/MM/YY | Am. 3 Submission DD/MM/YY |
| González-Moro                      | Sanitaria-Unidad de Bioética Viceconsejería de Ordenación Sanitaria y Salud Publica<br>C/ La Aduana, 29<br>3ªplanta<br>28013 Madrid                                                                                   |                                       |                            |                                 |                                                                       |                         |                                                                       |                           |
| 3032 / Benjamín Brotons            | Hospital Arnau de Vilanova de Valencia<br>Secretaría del CEIC<br>C/ San Clemente, 26<br>46015 Valencia                                                                                                                | Amalia Francés                        | 10/01/03                   | 09/07/03                        | 02/03/05                                                              | 02/02/06                | 28/07/06                                                              | 29/06/07                  |
| 3033 / Julio Merino                | Hospital General Carlos Haya<br>Secretaría del CEIC<br>Avda. Carlos Haya, s/n<br>29010 Málaga<br>CEIC Regional de Andalucía<br>Servicio Andaluz de Salud<br>Consj. de Salud<br>Av. Manuel Siurot,s/n<br>41013-Sevilla | Ramón Utrera<br><br>Antonio Velázquez | 10/10/02                   | 09/07/03                        | 20/01/05                                                              | 10/02/06                | 26/10/06                                                              | 29/06/07                  |
| 3034 / Miguel Perpiñá Tordera      | Hospital La Fe de Valencia<br>Secretaría del CEIC<br>Avda. de Campanar, 21<br>46009 Valencia                                                                                                                          | M.Gobernado Serrano                   | 27/11/02                   | 09/07/03<br>07/11/03 (Approval) | 07/03/05                                                              | 25/04/06                | 08/08/06                                                              | 29/06/07                  |

| Spain                              |                                                                                                                                                                                                                                         |                                                         |                            |                                        |                                                                       |                         |                                                                       |                           |
|------------------------------------|-----------------------------------------------------------------------------------------------------------------------------------------------------------------------------------------------------------------------------------------|---------------------------------------------------------|----------------------------|----------------------------------------|-----------------------------------------------------------------------|-------------------------|-----------------------------------------------------------------------|---------------------------|
| Centre number(s) / Investigator(s) | IRB or IEC (name/address)                                                                                                                                                                                                               | IRB or IEC Chairperson                                  | Protocol Approval DD/MM/YY | Am. 1 Submission DD/MM/YY              | Informed Consent/Pt. Information form (IB vers. 12) Approval DD/MM/YY | Am. 2 Approval DD/MM/YY | Informed Consent/Pt. Information form (IB vers. 13) Approval DD/MM/YY | Am. 3 Submission DD/MM/YY |
| 3035 / Dr. Francisco Ortega        | Hospital Universitario Virgen del Rocío<br>Secretaría del CEIC<br>Avda. Manuel Siurot, s/n<br>41013 Sevilla<br>CEIC Regional de Andalucía<br>Servicio Andaluz de Salud<br>Consejería de Salud<br>Av. Manuel Siurot,s/n<br>41013-Sevilla | Ana M <sup>a</sup><br>Casas<br><br>Antonio<br>Velázquez | 11/11/02                   | 09/07/03<br><br>06/10/03<br>(Approval) | 02/02/05                                                              | 03/02/06<br>10/02/06    | 26/07/06                                                              | 29/06/07                  |
| 3036 / Ángel López Encuentra       | CEIC regional de la comunidad de Madrid<br>Servicio de Regulación Sanitaria-Unidad de Bioética Viceconsejería de Ordenación Sanitaria y Salud Publica<br>C/ La Aduana, 29<br>3ªplanta<br>28013 Madrid                                   | Jesús Iñigo                                             | 20/11/02                   | 09/07/03                               | 11/02/05                                                              | 14/02/06                | 02/08/06                                                              | 29/06/07                  |
| 3037 / José Julián Batista         | Hospital Ntra. Sra. de la Candelaria<br>Secretaría del CEIC<br>Crtra. del Rosario, 145<br>38010 Santa Cruz de Tenerife                                                                                                                  | Javier Merino                                           | 20/02/03                   | 09/07/03                               | 27/01/05                                                              | 24/01/06                | 04/07/06                                                              | 29/06/07                  |

| Spain                              |                                                                                                                                                                                                            |                                     |                            |                           |                                                                       |                         |                                                                       |                           |
|------------------------------------|------------------------------------------------------------------------------------------------------------------------------------------------------------------------------------------------------------|-------------------------------------|----------------------------|---------------------------|-----------------------------------------------------------------------|-------------------------|-----------------------------------------------------------------------|---------------------------|
| Centre number(s) / Investigator(s) | IRB or IEC (name/address)                                                                                                                                                                                  | IRB or IEC Chairperson              | Protocol Approval DD/MM/YY | Am. 1 Submission DD/MM/YY | Informed Consent/Pt. Information form (IB vers. 12) Approval DD/MM/YY | Am. 2 Approval DD/MM/YY | Informed Consent/Pt. Information form (IB vers. 13) Approval DD/MM/YY | Am. 3 Submission DD/MM/YY |
| 3038 / Francisco Suárez Pinilla    | Hospital Clínico Lozano Blesa Secretaría del CEIC, Avda. San Juan Bosco, 15, 50009 Zaragoza<br>Comité Ético de Investigación Clínica de Aragón (CEICA), Avda. Gómez Laguna, 25 - Planta 9ª, 50009 Zaragoza | Máximo Bartolomé Mª González Hinjos | 12/12/02                   | 09/07/03                  | 11/02/05                                                              | 27/01/06                | 28/07/06                                                              | 29/06/07                  |
| 3039 / Ramón Agüero                | Hospital Universitario Marqués de Valdecilla Secretaría del CEIC Avda. Valdecilla, s/n 39008 Santander                                                                                                     | Felipe de la Llama                  | 05/02/03                   | 09/07/03                  | 10/03/05                                                              | 03/02/06                | 14/07/06                                                              | 29/06/07                  |

| Switzerland                        |                                                                                                                                         |                                                                        |                                                         |                            |                         |                         |                         |
|------------------------------------|-----------------------------------------------------------------------------------------------------------------------------------------|------------------------------------------------------------------------|---------------------------------------------------------|----------------------------|-------------------------|-------------------------|-------------------------|
| Centre number(s) / Investigator(s) | IRB or IEC (name/address)                                                                                                               | IRB or IEC Chairperson                                                 | Informed Consent/Pt. Information Form Approval DD/MM/YY | Protocol Approval DD/MM/YY | Am. 1 Approval DD/MM/YY | Am. 2 Approval DD/MM/YY | Am. 3 Approval DD/MM/YY |
| 3201 / Erich Russi                 | SPUK für Innere Medizin<br>USZ, Dep. Innere Medizin<br>Rämistrasse 100<br>8091 Zürich (old)<br>Sonneneggstrasse 12<br>8091 Zürich (new) | Prof. Dr. Jürg Müller (old)<br>Prof. Dr. med. Renato L. Galeazzi (new) | 29.08.02                                                | 29.08.02                   | -                       | 09.01.06                | 31.05.07                |
| 3202 / Markus Solèr                | Ethikkommission beider<br>BaselEKBB, Hebelstrasse 53<br>4056 Basel                                                                      | Prof. Dr. Hans Kummer (old)<br>Prof. Dr. med. André Perruchoud (new)   | 22.08.02                                                | 22.08.02                   | -                       | 13.01.06                | 29.05.07                |
| 3203 / Michael Tamm                | Ethikkommission beider<br>Basel EKBB, Hebelstrasse<br>53<br>4056 Basel                                                                  | Prof. Dr. Hans Kummer (old)<br>Prof. Dr. med. André Perruchoud (new)   | 22.08.02                                                | 22.08.02                   | -                       | 13.01.06                | 29.05.07                |
| 3204 / Otto Brändli                | SPUK für Innere Medizin<br>USZ, Dep. Innere Medizin<br>Rämistrasse 100<br>8091 Zürich (old)<br>Sonneneggstrasse 12<br>8091 Zürich (new) | Prof. Dr. Jürg Müller (old)<br>Prof. Dr. med. Renato L. Galeazzi (new) | 29.08.02                                                | 29.08.02                   | -                       | -                       | -                       |
| 3205 / Marco Pons                  | Comitato etico cantonale<br>c/o Sezione sanitaria<br>Via Orico 5, 6501 Bellinzona                                                       | Dr. Giovan Maria Zanini                                                | 21.11.02                                                | 21.11.02                   | -                       | 06.04.06                | 21.11.07                |
| 3206 / Jean-Marie Tschopp          | Commission Cantonale<br>Valaisanne d'Ethique<br>Médicale (CCVEM); Av.<br>Grand Champsec 86 ICHV,<br>1950 Sion                           | Prof. Patrick Ravussin                                                 | 21.10.02                                                | 21.10.02                   | -                       | 28.02.06                | 12.06.07                |



| Switzerland                        |                                                                                                                           |                        |                                                         |                            |                         |                         |                         |
|------------------------------------|---------------------------------------------------------------------------------------------------------------------------|------------------------|---------------------------------------------------------|----------------------------|-------------------------|-------------------------|-------------------------|
| Centre number(s) / Investigator(s) | IRB or IEC (name/address)                                                                                                 | IRB or IEC Chairperson | Informed Consent/Pt. Information Form Approval DD/MM/YY | Protocol Approval DD/MM/YY | Am. 1 Approval DD/MM/YY | Am. 2 Approval DD/MM/YY | Am. 3 Approval DD/MM/YY |
| 3208 / Thomas Hess                 | SPUK am Kantonsspital Winterthur,<br>Ethikkommission des Kantonsspitals Winterthur<br>Braucherstrasse 15, 8401 Winterthur | Dr. H.P. Keller        | 17.10.02                                                | 17.10.02                   | -                       | 30.12.05                | 21.06.07                |

| Taiwan                             |                                                                                    |                        |                                                         |                            |                         |                         |                         |
|------------------------------------|------------------------------------------------------------------------------------|------------------------|---------------------------------------------------------|----------------------------|-------------------------|-------------------------|-------------------------|
| Centre number(s) / Investigator(s) | IRB or IEC (name/address)                                                          | IRB or IEC Chairperson | Informed Consent/Pt. Information Form Approval DD/MM/YY | Protocol Approval DD/MM/YY | Am. 1 Approval DD/MM/YY | Am. 2 Approval DD/MM/YY | Am. 3 Approval DD/MM/YY |
| 3301 / Pan-Chyi Yang               | Research Ethics Committee NTUIH/ 7, Chung-Shan South Road, Taipei, Taiwan 100, ROC | Pan-Chyr Yang          | 25/Nov/2002                                             | 25/Nov/2002                | 15/Jun/2004             | 18/Apr/2007             | 10/Jul/2007             |
| 3302 / Han-Pin Kuo                 | JIRB/ No.201, Sec 2, Shih-pai Road, Taiwan 11217 ROC                               | Tsang-Tang Hsieh       | 05/Aug/2002                                             | 05/Aug/2002                | 15/Jun/2004             | 27/Sep/2006             | 07/Aug/2007             |
| 3303 / Guang-Ming Shiao            | JIRB/ No.201, Sec 2, Shih-pai Road, Taiwan 11217 ROC                               | Tsang-Tang Hsieh       | 05/Aug/2002                                             | 05/Aug/2002                | 15/Jun/2004             | 27/Sep/2006             | 07/Aug/2007             |

| Thailand                           |                                                                                                                 |                                                                            |                                                                                                                                                                                              |                            |                         |                         |                         |
|------------------------------------|-----------------------------------------------------------------------------------------------------------------|----------------------------------------------------------------------------|----------------------------------------------------------------------------------------------------------------------------------------------------------------------------------------------|----------------------------|-------------------------|-------------------------|-------------------------|
| Centre number(s) / Investigator(s) | IRB or IEC (name/address)                                                                                       | IRB or IEC Chairperson                                                     | Informed Consent/Pt. Information Form Approval DD/MM/YY                                                                                                                                      | Protocol Approval DD/MM/YY | Am. 1 Approval DD/MM/YY | Am. 2 Approval DD/MM/YY | Am. 3 Approval DD/MM/YY |
| 3401 / Pothirat Chaicharn          | Research Ethical Committee, Faculty of Medicine, Chiang Mai University                                          | Prof. Kumpol Klunklin<br>Assoc.Prof. Sungwal Rudpao<br>Prof.Malai Muttaruk | Version 2.0 (12 Nov 02)<br>Version 3.0 (22 Aug 06)<br>Version 4.0 (22 Aug 06)<br>Long term follow-up (22 Aug 06)<br>Addendum for safety (22 Aug 06); Addendum for transportation (12 Feb 07) | 12 Nov 02                  | 23 Sep 03               | 22 Aug 06               | 3 Jul 07                |
| 3402 / Wongtim Somkiat             | The Ethics Committee of The Faculty of Medicine, Chulalongkorn University, Bangkok, Thailand                    | Prof.Anek Aribarg                                                          | Version 1.0 (14 Feb 02)<br>Version 2.0 (17 Aug 05)<br>Version 3.0 (4 Sep 06)<br>Long term follow-up (4 Sep 06)<br>Addendum for safety (4 Sep 06); Addendum for transportation; (11 Jul 07)   | 5 Jul 02                   | 12 Nov 03               | 4 Sep 06                | 21 Jun 07               |
| 3403 / Kiatboonsri Sumalee         | Ethical Clearance Committee on Human Rights Related to Researches Involving Human Subjects Faculty of Medicine, | Prof.Krisada Ratana-Olarn<br>Prof.Duangrurdee Wattanasirichaigoon          | Version 2.0 (15 May 02)<br>Version 3.0 (18 May 03)                                                                                                                                           | 15 May 02                  | 26 Nov 03               | 27 Sep 06               | 20 Jun 07               |

| Thailand                           |                                                                                                                     |                                                                                                          |                                                                                                                                                                                        |                            |                         |                         |                         |
|------------------------------------|---------------------------------------------------------------------------------------------------------------------|----------------------------------------------------------------------------------------------------------|----------------------------------------------------------------------------------------------------------------------------------------------------------------------------------------|----------------------------|-------------------------|-------------------------|-------------------------|
| Centre number(s) / Investigator(s) | IRB or IEC (name/address)                                                                                           | IRB or IEC Chairperson                                                                                   | Informed Consent/Pt. Information Form Approval DD/MM/YY                                                                                                                                | Protocol Approval DD/MM/YY | Am. 1 Approval DD/MM/YY | Am. 2 Approval DD/MM/YY | Am. 3 Approval DD/MM/YY |
|                                    | Ramathibodi Hospital, Mahidol University                                                                            | Prof.Boonsong Ongphiphadhanakul                                                                          | Version 4.0 (27 Sep 06)<br>Long term follow-up (27 Sep 06)<br>Addendum for safety (27 Sep 06)<br>Addendum for transportation (Pending)                                                 |                            |                         |                         |                         |
| 3404 / Wanchai Dejsomritrutai      | The Ethical Committee on Research Involving Human Subject Faculty of Medicine, Siriraj Hospital, Mahidol University | Prof.Sumalee Nimmannit<br>Prof.Shusee Visalyaputra                                                       | Version 2.0 (19 Jul 02)<br>Version 3.0 (N/A)<br>Version 4.0 (18 Aug 06)<br>Long term follow-up (18 Aug 06)<br>Addendum for safety (18 Aug 06)<br>Addendum for transportation (Pending) | 19 Jul 02                  | 10 Oct 03               | 18 Aug 06               | 22 Jun 07               |
| 3405 / Boonsawat Watchara          | The Khon Kean University Ethics Committee for Human Research                                                        | Prof.Pisak Lumbiganon<br>Assoc.Prof.Verachai Kowsuwan<br>Prof.Pyatat Tatsanavivat<br>Assoc.Prof.Jiraporn | Version 2.0 (15 Aug 02)<br>Version 3.0 (17 Aug 06)<br>Version 4.0 (17 Aug 06)<br>Long term follow-                                                                                     | 15 Aug 02                  | 16 Oct 03               | 17 Aug 06               | 22 Jun 07               |

| Thailand                           |                           |                        |                                                                                                       |                            |                         |                         |                         |
|------------------------------------|---------------------------|------------------------|-------------------------------------------------------------------------------------------------------|----------------------------|-------------------------|-------------------------|-------------------------|
| Centre number(s) / Investigator(s) | IRB or IEC (name/address) | IRB or IEC Chairperson | Informed Consent/Pt. Information Form Approval DD/MM/YY                                               | Protocol Approval DD/MM/YY | Am. 1 Approval DD/MM/YY | Am. 2 Approval DD/MM/YY | Am. 3 Approval DD/MM/YY |
|                                    |                           | Srinakarin             | up<br>(17 Aug 06)<br>Addendum for safety<br>(17 Aug 06)<br>Addendum for transportation<br>(16 Feb 07) |                            |                         |                         |                         |

| Turkey                             |                                                                                                            |                                   |                                                         |                            |                         |                         |                         |
|------------------------------------|------------------------------------------------------------------------------------------------------------|-----------------------------------|---------------------------------------------------------|----------------------------|-------------------------|-------------------------|-------------------------|
| Centre number(s) / Investigator(s) | IRB or IEC (name/address)                                                                                  | IRB or IEC Chairperson            | Informed Consent/Pt. Information Form Approval DD/MM/YY | Protocol Approval DD/MM/YY | Am. 1 Approval DD/MM/YY | Am. 2 Approval DD/MM/YY | Am. 3 Approval DD/MM/YY |
| 3501 / Muzeyyen Erk                | Istanbul Universitesi Cerrahpasa Tip Fakultesi Yerel Etik Kurulu Cerrahpasa-Istanbul                       | Prof. Dr. Ercument Olmez          | 19 JUN 2002                                             | 19 JUN 2002                | NA                      | 23 FEB 2006             | 16 OCT 2007             |
| 3502 / Esin Tuncay                 | Yedikule Egt. Ve Aras. Hastanesi Yerel Etik Kurulu Zeytinburnu-Istanbul                                    | Assoc. Prof. Dr. Sedat Altin      | 10 JUN 2002                                             | 10 JUN 2002                | NA                      | 06 JAN 2006             | 16 JAN 2008             |
| 3503 / Turgay Celikel              | Marmara Universitesi Tip Fakultesi Yerel Etik Kurulu Haydarpasa-Istanbul                                   | Prof. Dr. Haner Direskeneli       | 29 AUG 2002                                             | 29 AUG 2002                | NA                      | 03 MAR 2006             | 21 JUL 2007             |
| 3504 / Benan Caglayan              | Dr. Lutfi Kirdar Kartal Egt. ve Arastirma Hastanesi Yerel Etik Kurulu Kartal-Istanbul                      | Assoc. Prof. Dr. Ulku Turk        | 22 AUG 2002                                             | 22 AUG 2008                | NA                      | 26 JAN 2006             | 31 MAY 2007             |
| 3505 / Levent Tabak                | Istanbul Universitesi Istanbul Tip Fakultesi Yerel Etik Kurulu CAPA-Istanbul                               | Prof. Dr. Zafer Ari               | 11 SEP 2002                                             | 11 SEP 2002                | NA                      | 20 MAR 2006             | 20 JUN 2007             |
| 3506 / Lutfi Cöplü                 | Hacettepe Universitesi Tip Fakultesi Yerel Etik Kurulu-Sihhiye-Ankara                                      | Prof. Dr. Rustu Onur              | 05 JUN 2002                                             | 05 JUN 2002                | NA                      | 15 FEB 2006             | 26 JUN2007              |
| 3507 / Sadik Ardic                 | SB. Diskapi Egt. ve Arastirma Hastanesi Yerel Etik Kurulu Diskapi-Ankara                                   | Prof. Dr. Metin Aydin             | 18 JUL 2002                                             | 18 JUL 2002                | NA                      | 02 FEB 2006             | 02 NOV 2007             |
| 3508 / Nazire Ucar                 | Ataturk Göğ. Hast. Ve Gogus Cerrahi Merkezi Eğitim ve Arastirma Hast. Yerel Etik Kurulu Sanatoryum -Ankara | Assoc. Prof. Dr. Yurdanur Erdogan | 31 MAY 2002                                             | 31 MAY 2002                | NA                      | 20 JAN 2006             | 27 FEB 2008             |
| 3509 / Arzu Mirici                 | Ataturk Universitesi Tip Fakultesi Yerel Etik Kurulu-Yakutiye-Erzurum                                      | Prof. Dr. Zerrin Orbak            | 24 JUL 2002                                             | 24 JUL 2002                | NA                      | 09 JAN 2006             | 29 MAY 2007             |

| Turkey                             |                                                                     |                             |                                                         |                            |                         |                         |                         |
|------------------------------------|---------------------------------------------------------------------|-----------------------------|---------------------------------------------------------|----------------------------|-------------------------|-------------------------|-------------------------|
| Centre number(s) / Investigator(s) | IRB or IEC (name/address)                                           | IRB or IEC Chairperson      | Informed Consent/Pt. Information Form Approval DD/MM/YY | Protocol Approval DD/MM/YY | Am. 1 Approval DD/MM/YY | Am. 2 Approval DD/MM/YY | Am. 3 Approval DD/MM/YY |
| 3510 / Ali Kocabas                 | Cukurova Universitesi Tip Fakultesi Yerel Etik Kurulu Balcali-Adana | Prof. Dr. Selim Kadioglu    | 12 JUN2002                                              | 12 JUN 2002                | NA                      | 03 FEB 2006             | 09 NOV 2007             |
| 3511 / Sinan Erginel               | Osmangazi Universitesi Tip Fakultesi Yerel Etik Kurulu Eskisehir    | Prof. Dr. Zubeyir Kilic     | 10 JUN 2002                                             | 10 JUN 2002                | NA                      | 28 FEB 2006             | 27 JUL 2007             |
| 3512 / Arif Hikmet Cimrin          | Dokuz Eylul Tip Fakultesi Yerel Etik Kurulu Izmir                   | Prof. Dr. Meral Koyuncuoglu | 11 JUL 2002                                             | 11 JUL 2002                | NA                      | 08 MAY 2006             | 07 FEB 2008             |

**UK**

| <b>Centre number(s) / Investigator(s)</b> | <b>IRB or IEC (name/address)</b>                                                                                                                                    | <b>IRB or IEC Chairperson</b> | <b>Informed Consent/Pt. Information Form Approval DD/MM/YY</b> | <b>Protocol Approval DD/MM/YY</b> | <b>*Am. 1 Approval DD/MM/YY</b> | <b>*Am. 2 Approval DD/MM/YY</b> | <b>*Am. 3 Approval DD/MM/YY</b> | <b>*Am. 1 (UK) Approval DD/MM/YY</b> |
|-------------------------------------------|---------------------------------------------------------------------------------------------------------------------------------------------------------------------|-------------------------------|----------------------------------------------------------------|-----------------------------------|---------------------------------|---------------------------------|---------------------------------|--------------------------------------|
| Overall Country Approval                  | South West Multi Centre Research Ethics Committee, The Lescaze Offices, Skinner's Bridge Dartington Devon TQ9 6JE                                                   | Mr Barrie Behenna             | 10/02/03                                                       | 10/02/03                          | Not approved in the UK          | Not approved in the UK          | 17/05/07                        | 17/05/07                             |
| 3601 / Dr. Adel Mansur                    | East Birmingham Local Research Ethics Committee, Birmingham Heartlands Hospital, Bordesley Green East, Birmingham B9 5SS                                            | Dr S Rose                     | 03/04/03                                                       | 03/04/03                          | N/A                             | N/A                             | N/A                             | N/A                                  |
| 3602 / Christine Bucknall                 | North Glasgow University Hospital NHS Trust, R&D Office, Glasgow Royal Infirmary, 4 <sup>th</sup> Floor, QEB University Block, 10 Alexandra Parade, Glasgow G31 2ER | Dr J B Neilly                 | 19/03/03                                                       | 19/03/03                          | N/A                             | N/A                             | N/A                             | N/A                                  |
| 3603 / Paul Fletcher                      | South West Peninsula NHS, Plymouth Local Research Ethics Committee, Room 101B, TTC South Building, Tamar Science Park, Davy Road, Derriford, Plymouth PL6 8BX       | Mr A J R Beauchamp            | 28/08/03                                                       | 28/08/03                          | N/A                             | N/A                             | N/A                             | N/A                                  |



## UK

| Centre number(s) / Investigator(s) | IRB or IEC (name/address)                                                                                                                               | IRB or IEC Chairperson | Informed Consent/Pt. Information Form Approval DD/MM/YY | Protocol Approval DD/MM/YY | *Am. 1 Approval DD/MM/YY | *Am. 2 Approval DD/MM/YY | *Am. 3 Approval DD/MM/YY | *Am. 1 (UK) Approval DD/MM/YY |
|------------------------------------|---------------------------------------------------------------------------------------------------------------------------------------------------------|------------------------|---------------------------------------------------------|----------------------------|--------------------------|--------------------------|--------------------------|-------------------------------|
| 3604 / Paul Griffiths              | North Manchester Local Research Ethics Committee, Gateway House, Piccadilly South, Manchester M60 7LP                                                   | Mrs Gillian Rimmington | 06/03/03                                                | 06/03/03                   | N/A                      | N/A                      | N/A                      | N/A                           |
| 3605 / David Halpin                | North and East Devon LREC, Department of Research Ethics and Medical Affairs, Old Kenn Ward Royal Devon & Exeter Hospital, Barrack Road, Exeter EX2 5DW | Dr Terry Jones         | 26/03/03                                                | 26/03/03                   | N/A                      | N/A                      | N/A                      | N/A                           |
| 3607 / Michael Morgan              | Leicestershire Local Research Ethics Committee (Committee Two), Lakeside House, 4 Smith Way, Grove Park Enderby Leicester LE19 1SS                      | Dr D Heney             | 14/04/03                                                | 14/04/03                   | N/A                      | N/A                      | N/A                      | N/A                           |
| 3608 / Alyn Morice                 | Hull and East Riding LREC, Room C24, College House, Willerby Hill Business Park, Willerby HU10 6NS                                                      | Prof S R Killick       | 19/03/03                                                | 19/03/03                   | N/A                      | N/A                      | N/A                      | N/A                           |

## UK

| Centre number(s) / Investigator(s) | IRB or IEC (name/address)                                                                                                                                                    | IRB or IEC Chairperson | Informed Consent/Pt. Information Form Approval DD/MM/YY | Protocol Approval DD/MM/YY | *Am. 1 Approval DD/MM/YY | *Am. 2 Approval DD/MM/YY | *Am. 3 Approval DD/MM/YY | *Am. 1 (UK) Approval DD/MM/YY |
|------------------------------------|------------------------------------------------------------------------------------------------------------------------------------------------------------------------------|------------------------|---------------------------------------------------------|----------------------------|--------------------------|--------------------------|--------------------------|-------------------------------|
| 3609 / Paul Anderson               | Sheffield Teaching Hospitals NHS Trust, North Sheffield Ethics Office, 1 <sup>st</sup> Floor, Vickers Corridor, Northern General Hospital, Herries Road, Sheffield S5 7AU    | Dr S R Brennan         | 06/03/03                                                | 06/03/03                   | N/A                      | N/A                      | N/A                      | N/A                           |
| 3610 / Paul Plant                  | The Leeds Teaching Hospitals NHS Trust, Local Research Ethics Committee, Room 5.1, Clinical Sciences Building, St James's University Hospital, Beckett Street, Leeds LS9 7TF | Dr P R F Dear          | 20/03/03                                                | 20/03/03                   | N/A                      | N/A                      | N/A                      | N/A                           |
| 3611 / Mark Britton                | North West Surrey Local Research Ethics Committee, Bournemouth House, St Peters Hospital Site, Guildford Road, Chertsey, Surrey KT16 0QA                                     | Mrs Anne Damerell      | 31/03/03                                                | 31/03/03                   | N/A                      | N/A                      | N/A                      | N/A                           |
| 3612 / Timothy Harrison            | Nottingham Research Ethics Committee 1, 1 Standard Court, Park Row, Nottingham NG1 6GN                                                                                       | Dr D Pearson           | 14/04/03                                                | 14/04/03                   | N/A                      | N/A                      | N/A                      | N/A                           |

## UK

| Centre number(s) / Investigator(s) | IRB or IEC (name/address)                                                                                                        | IRB or IEC Chairperson | Informed Consent/Pt. Information Form Approval DD/MM/YY | Protocol Approval DD/MM/YY | *Am. 1 Approval DD/MM/YY | *Am. 2 Approval DD/MM/YY | *Am. 3 Approval DD/MM/YY | *Am. 1 (UK) Approval DD/MM/YY |
|------------------------------------|----------------------------------------------------------------------------------------------------------------------------------|------------------------|---------------------------------------------------------|----------------------------|--------------------------|--------------------------|--------------------------|-------------------------------|
| 3613 / Stephen Crooks              | North Derbyshire Local Research Ethics Committee, Scarsdale, Newbold Road, Chesterfield, Derbyshire S41 7PF                      | Mr Jonathan O Harris   | 19/03/03                                                | 19/03/03                   | N/A                      | N/A                      | N/A                      | N/A                           |
| 3614 / Tim Griffiths               | South East Wales Local Research Ethics Committees, Business Services Centre, Churchill House, 17 Churchill Way, Cardiff CF10 2TW | Dr D E B Powell        | 20/03/03                                                | 20/03/03                   | N/A                      | N/A                      | N/A                      | N/A                           |
| 3615 / Dr. Graham Douglas          | Grampian Research Ethics Committee (1), NHS Grampian, Summerfield House, 2 Eday Road, Aberdeen AB15 6RE                          | Dr John Dean           | 03/03/03                                                | 03/03/03                   | N/A                      | N/A                      | N/A                      | N/A                           |
| 3616 / Jane Gravil                 | Argyll & Clyde NHS Board, Local Research Ethics Committee, Ross House, Hawkhead Road, Paisley PA2 7BN                            | Mrs L McKichan         | 01/04/03                                                | 01/04/03                   | N/A                      | N/A                      | N/A                      | N/A                           |

\* UK legislation requires that MREC approved amendments are submitted to LREC for information only so approval is not required.

## USA

| Centre number(s) / Investigator(s) | IRB or IEC (name/address)                                                                                                                      | IRB or IEC Chairperson                                                                   | Informed Consent/Pt. Information Form Approval DD/MM/YY | Protocol Approval DD/MM/YY | Am. 1 Approval DD/MM/YY | Am. 2 Approval DD/MM/YY | Am. 3 Approval DD/MM/YY |
|------------------------------------|------------------------------------------------------------------------------------------------------------------------------------------------|------------------------------------------------------------------------------------------|---------------------------------------------------------|----------------------------|-------------------------|-------------------------|-------------------------|
| 3701 / Murray Altose               | MetroHealth System Institutional Review Board<br>MetroHealth Medical Center<br>2500 MetroHealth Dr.<br>Cleveland, OH 44109                     | Ben Brouhard,<br>2002 Thomas Swales, 2004<br>David Kuentz<br>2006-2007                   | 11-July-02                                              | 11-July-02                 | 30-Jul-03               | 18-Jan-06               | 03-Oct-07               |
| 3703 / Theodore Amgott             | Western Institutional Review Board<br>3535 Seventh Avenue,<br>SW<br>Olympia, WA 98502-5010                                                     | William C. Jacobs, 2002-2004<br>Theodore D. Schultz, 2005-2008                           | 23-May 02                                               | 23-May 02                  | 11-Jul-03               | 21-Dec-05               | 23-May-07               |
| 3704 / Charles Andrews             | Western Institutional Review Board<br>3535 Seventh Avenue,<br>SW<br>Olympia, WA 98502-5010                                                     | William C. Jacobs, 2002-2004<br>Theodore Schultz, 2005-2008                              | 16-May-02                                               | 16-May-02                  | 28-Jul-03               | 21-Dec-05               | 23-May-07               |
| 3706 / Claudia Cote                | Bay Pines VA Medical Center<br>Bay Pines VAMC Institutional Review Board<br>10000 Bay Pines Blvd<br>Bldg 22 Rm 123<br>St. Petersburg, FL 33708 | Lynne Krop, 2002<br>Pedro Vera, 2003<br>Katherine Meyer-Siegler, 2004<br>Rachel McArdle, | 8-Aug-02                                                | 8-Aug-02                   | 15-Aug-03               | 12-Jan-06               | 22-June-07              |

**USA**

| <b>Centre number(s) / Investigator(s)</b> | <b>IRB or IEC (name/address)</b>                                                                                                                                | <b>IRB or IEC Chairperson</b>                                  | <b>Informed Consent/Pt. Information Form Approval DD/MM/YY</b> | <b>Protocol Approval DD/MM/YY</b> | <b>Am. 1 Approval DD/MM/YY</b> | <b>Am. 2 Approval DD/MM/YY</b> | <b>Am. 3 Approval DD/MM/YY</b> |
|-------------------------------------------|-----------------------------------------------------------------------------------------------------------------------------------------------------------------|----------------------------------------------------------------|----------------------------------------------------------------|-----------------------------------|--------------------------------|--------------------------------|--------------------------------|
|                                           |                                                                                                                                                                 | 2007                                                           |                                                                |                                   |                                |                                |                                |
| 3707 / Francis Averill                    | Western Institutional Review Board<br>3535 Seventh Avenue, SW<br>Olympia, WA 98502-5010                                                                         | William C. Jacobs, 2002-2004<br>Theodore D. Schultz, 2005-2008 | 13-June-02                                                     | 13-June-02                        | 28-July-03                     | 21-Dec-05                      | 23-May-07                      |
| 3708 / William Bailey                     | University of Alabama at Birmingham Institutional Review Board<br>470 Administration Building<br>701 20 <sup>th</sup> Street South<br>Birmingham, AL 35294-0104 | Ferdinand Urthaler, 2002-2007                                  | 25-Sep-02                                                      | 25-Sep-02                         | 11-Aug-03                      | 1-Feb-06                       | 17-May-07                      |
| 3711 / George Bensch                      | Western Institutional Review Board<br>3535 Seventh Avenue, SW<br>Olympia, WA 98502-5010                                                                         | William C. Jacobs, 2002-2004<br>Theodore D. Schultz, 2005-2008 | 20-Jun-02                                                      | 20-Jun-02                         | 28-July-03                     | 21-Dec-05                      | 23-May-07                      |
| 3712 / Eugene R. Bleecker                 | The Office of Research and Development<br>Wake Forest University<br>School of Medicine<br>Medical Center Blvd<br>Winston-Salem, NC 27157                        | Anthony Liquiri 2007<br>Richard Weinberg 2008                  | 17-July-02                                                     | 17-July-02                        | 20-Aug-03                      | 16-Jan-07                      | 2-May-07                       |

## USA

| Centre number(s) / Investigator(s) | IRB or IEC (name/address)                                                                  | IRB or IEC Chairperson                                         | Informed Consent/Pt. Information Form Approval DD/MM/YY | Protocol Approval DD/MM/YY | Am. 1 Approval DD/MM/YY                                          | Am. 2 Approval DD/MM/YY | Am. 3 Approval DD/MM/YY |
|------------------------------------|--------------------------------------------------------------------------------------------|----------------------------------------------------------------|---------------------------------------------------------|----------------------------|------------------------------------------------------------------|-------------------------|-------------------------|
|                                    |                                                                                            |                                                                |                                                         |                            |                                                                  |                         |                         |
| 3713 / David Koh                   | Western Institutional Review Board<br>3535 Seventh Avenue,<br>SW<br>Olympia, WA 98502-5010 | William C. Jacobs, 2002-2004<br>Theodore D. Schultz, 2005-2008 | 23-May-02                                               | 23-May-02                  | 28-Jul-03                                                        | 21-Dec-05               | 23-May-07               |
| 3715 / Sidney Braman               | Committee on the Protection of Human Subjects<br>593 Eddy Street<br>Providence, RI 02903   | Penelope Dennehy, 2002-2005                                    | 11-Oct-02                                               | 11-Oct-02                  | Did not submit All patients completed visit 2 prior to amendment | 22-Dec-05               | 15-May-07               |
| 3716 / Alfred Lynn Brannen         | Western Institutional Review Board<br>3535 Seventh Avenue,<br>SW<br>Olympia, WA 98502-5010 | William C. Jacobs, 2002-2004<br>Theodore D. Schultz, 2005-2008 | 22-Aug-02                                               | 22-Aug-02                  | 28-Jul-03                                                        | 21-Dec-05               | 23-May-07               |
| 3717 / Shari Ann Brazinsky         | Western Institutional Review Board<br>3535 Seventh Avenue,<br>SW<br>Olympia, WA 98502-5010 | William C. Jacobs, 2002-2004<br>Theodore D. Schultz, 2005-2008 | 16-May-02                                               | 16-May-02                  | 28-Jul-03                                                        | 21-Dec-05               | 23-May-07               |

## USA

| <b>Centre number(s) / Investigator(s)</b> | <b>IRB or IEC (name/address)</b>                                                                                | <b>IRB or IEC Chairperson</b>                                  | <b>Informed Consent/Pt. Information Form Approval DD/MM/YY</b> | <b>Protocol Approval DD/MM/YY</b> | <b>Am. 1 Approval DD/MM/YY</b> | <b>Am. 2 Approval DD/MM/YY</b> | <b>Am. 3 Approval DD/MM/YY</b> |
|-------------------------------------------|-----------------------------------------------------------------------------------------------------------------|----------------------------------------------------------------|----------------------------------------------------------------|-----------------------------------|--------------------------------|--------------------------------|--------------------------------|
| 3718 / Timothy Bruya                      | Western Institutional Review Board<br>3535 Seventh Avenue, SW<br>Olympia, WA 98502-5010                         | William C. Jacobs, 2002-2004<br>Theodore D. Schultz, 2005-2008 | 13-Jun-02                                                      | 13-Jun-02                         | 28-Jul-03                      | 21-Dec-05                      | 23-May-07                      |
| 3721 / Bartolome Celli                    | Research/Human Subjects Committee<br>St. Elizabeth's Medical Center<br>736 Cambridge Street<br>Boston, MA 02135 | Alan Ashare, 2002-2006                                         | 28-Oct-02                                                      | 9-Jul-02                          | 8-Sep-03                       | 25-Jan-06                      | 07-Apr-08                      |
| 3722 / John. J. Conдеми                   | Western Institutional Review Board<br>3535 Seventh Avenue, SW<br>Olympia, WA 98502-5010                         | William C. Jacobs, 2002-2004<br>Theodore D. Schultz, 2005-2006 | 9-May-02                                                       | 9-May-02                          | 28-Jul-03                      | 21-Dec-05                      | 23-May-07                      |
| 3723 / Bruce Corser                       | Western Institutional Review Board<br>3535 Seventh Avenue, SW<br>Olympia, WA 98502-5010                         | William C. Jacobs, 2002-2004<br>Theodore D. Schultz, 2005-2006 | 6-Jun-02                                                       | 6-Jun-02                          | 28-Jul-03                      | 21-Dec-05                      | 23-May-07                      |
| 3724 / James Osmanski                     | Western Institutional Review Board<br>3535 Seventh Avenue, SW<br>Olympia, WA 98502-5010                         | William C. Jacobs, 2002-2004<br>Theodore D. Schultz, 2005-     | 12-Sept-02                                                     | 12-Sept-02                        | 28-Jul-03                      | 21-Dec-05                      | 23-May-07                      |

**USA**

| <b>Centre number(s) / Investigator(s)</b> | <b>IRB or IEC (name/address)</b>                                                                                                                                                       | <b>IRB or IEC Chairperson</b>                                  | <b>Informed Consent/Pt. Information Form Approval DD/MM/YY</b> | <b>Protocol Approval DD/MM/YY</b> | <b>Am. 1 Approval DD/MM/YY</b> | <b>Am. 2 Approval DD/MM/YY</b> | <b>Am. 3 Approval DD/MM/YY</b> |
|-------------------------------------------|----------------------------------------------------------------------------------------------------------------------------------------------------------------------------------------|----------------------------------------------------------------|----------------------------------------------------------------|-----------------------------------|--------------------------------|--------------------------------|--------------------------------|
|                                           |                                                                                                                                                                                        | 2008                                                           |                                                                |                                   |                                |                                |                                |
| 3725 / Timothy Craig                      | Penn State College of Medicine<br>The Milton S. Hershey Medical Center,<br>Institutional Review Board, Human Subjects Projection Office, 500 University Drive, H112, Hershey, PA 17033 | Kevin Gleeson, 2001-2006                                       | 30-Jul-02                                                      | 30-Jul-02                         | 08-Jul-03                      | 04-Jan-06                      | 02-May-07                      |
| 3727 / Arthur Degraff                     | Western Institutional Review Board<br>3535 Seventh Avenue, SW<br>Olympia, WA 98502-5010                                                                                                | William C. Jacobs, 2002-2004<br>Theodore D. Schultz, 2005-2008 | 23-May-02                                                      | 23-May-02                         | 28-Jul-03                      | 21-Dec-05                      | 23-May-07                      |
| 3729 / Dennis E. Doherty                  | University of Kentucky Institutional Review Board<br>Room 315 Kinkeed Hall<br>Lexington, KY 40506                                                                                      | Thomas Foster, 2003<br>Edward Hirschowitz, 2002                | 25-Jul-02                                                      | 25-Jul-02                         | 12-Aug-03                      | 11-Jan-06                      | 05 May 2007                    |
| 3730 / Dr. Anderson                       | Western Institutional Review Board<br>3535 Seventh Avenue, SW<br>Olympia, WA 98502-5010                                                                                                | William C. Jacobs, 2002-2004<br>Theodore D. Schultz, 2005-2008 | 18-Apr-02                                                      | 18-Apr-02                         | 28-Jul-03                      | 21-Dec-05                      | 01-May-07                      |



## USA

| Centre number(s) / Investigator(s) | IRB or IEC (name/address)                                                                                                                                                            | IRB or IEC Chairperson                             | Informed Consent/Pt. Information Form Approval DD/MM/YY | Protocol Approval DD/MM/YY | Am. 1 Approval DD/MM/YY | Am. 2 Approval DD/MM/YY | Am. 3 Approval DD/MM/YY |
|------------------------------------|--------------------------------------------------------------------------------------------------------------------------------------------------------------------------------------|----------------------------------------------------|---------------------------------------------------------|----------------------------|-------------------------|-------------------------|-------------------------|
|                                    |                                                                                                                                                                                      |                                                    |                                                         |                            |                         |                         |                         |
| 3731 / James Donohue               | The Committee on the Protection of the Rights of Human Subjects<br>University of North Carolina at Chapel Hill<br>CB# 7097, Medical School Building 52<br>Chapel Hill, NC 27599-7097 | Stephen Bernard, 2008<br>Robert Lowman, 2002       | 04-Oct-02                                               | 04-Oct-02                  | 22-Aug-03               | 15-Mar-06               | 10-May-07               |
| 3732 / Michael Eichenhorn          | Human Rights Committee (IRB)<br>Henry Ford Hospital<br>2799 West Grand Boulevard, CFP-B<br>Detroit, MI 48202                                                                         | Ajlouni Muntler, 2002<br>Timothy Roehrs, 2003-2004 | 04-Jun-02                                               | 04-Jun-02                  | 11-Jul-03               | 02-Feb-06               | 02-May-07               |
| 3734 / Neil Ettinger               | St. Luke's Hospital IRB<br>232 South Woods Mill Road<br>Chesterfield, MO 63017                                                                                                       | John Meyer, 2002-2006                              | 28-Jul-02                                               | 28-Jul-02                  | 25-Jul-03               | 25-Jan-06               | 27-Jun-07               |
| 3736 / Dr. Joseph A. Govert        | Duke University IRB<br>Box 2991 Duke University Medical Center<br>2400 Pratt Street, Suite 9000<br>Durham, NC 27708                                                                  | John Falletta, 2002<br>John Harrelson 2006-2007    | 16-Oct-02                                               | 16-Oct-02                  | 24-Jul-03               | 17-Apr-06               | 16-May-07               |

## USA

| Centre number(s) / Investigator(s) | IRB or IEC (name/address)                                                                                                                                                       | IRB or IEC Chairperson                                         | Informed Consent/Pt. Information Form Approval DD/MM/YY | Protocol Approval DD/MM/YY | Am. 1 Approval DD/MM/YY | Am. 2 Approval DD/MM/YY | Am. 3 Approval DD/MM/YY |
|------------------------------------|---------------------------------------------------------------------------------------------------------------------------------------------------------------------------------|----------------------------------------------------------------|---------------------------------------------------------|----------------------------|-------------------------|-------------------------|-------------------------|
|                                    |                                                                                                                                                                                 |                                                                |                                                         |                            |                         |                         |                         |
| 3737 / Dr. Joseph Lasky            | Committee on Use of Human Subjects TW 36<br>Office of the Dean<br>Tulane School of Medicine<br>1430 Tulane Avenue<br>Tidewater Building, Room 830<br>New Orleans, LA 70112-2699 | Ina Friedman, 2001-2004<br>Mark James 2006-2007                | 06-Jan-02                                               | 06-Jan-02                  | 8-Jul-03                | 16-Jan-06               | 31-Jul-07               |
| 3738 / Glenn Giessel               | Western Institutional Review Board<br>3535 Seventh Avenue, SW<br>Olympia, WA 98502-5010                                                                                         | William C. Jacobs, 2002-2004<br>Theodore D. Schultz, 2005-2008 | 18-Apr-02                                               | 18-Apr-02                  | 28-Jul-03               | 21-Dec-05               | 23-May-07               |
| 3739 / Dr. Richard Pomerantz       | Western Institutional Review Board<br>3535 Seventh Avenue, SW<br>Olympia, WA 98502-5010                                                                                         | William C. Jacobs, 2002-2004<br>Theodore D. Schultz, 2005-2008 | 02-May-02                                               | 02-May-02                  | 27-Aug-03               | 21-Dec-05               | 23-May-07               |
| 3741 / Gary I. Greenwald           | Western Institutional Review Board<br>3535 Seventh Avenue, SW<br>Olympia, WA 98502-5010                                                                                         | William C. Jacobs, 2002-2004<br>Theodore D. Schultz, 2005-     | 02-May-02                                               | 02-May-02                  | 28-Jul-03               | 21-Dec-05               | 23-May-07               |

## USA

| Centre number(s) / Investigator(s) | IRB or IEC (name/address)                                                                                                             | IRB or IEC Chairperson                                         | Informed Consent/Pt. Information Form Approval DD/MM/YY | Protocol Approval DD/MM/YY | Am. 1 Approval DD/MM/YY | Am. 2 Approval DD/MM/YY | Am. 3 Approval DD/MM/YY |
|------------------------------------|---------------------------------------------------------------------------------------------------------------------------------------|----------------------------------------------------------------|---------------------------------------------------------|----------------------------|-------------------------|-------------------------|-------------------------|
|                                    |                                                                                                                                       | 2008                                                           |                                                         |                            |                         |                         |                         |
| 3742 / Nicola Hanania              | IRB for Human Subject Research for Baylor College of Medicine and Affiliated Hospitals<br>One Baylor Plaza, 600D<br>Houston, TX 77030 | Kathleen Motil, PhD<br>Stacey Berg,<br>2001-2003               | 04-Jun-02                                               | 04-Jun-02                  | 10-Sep-03               | 12-Jan-06               | 12-Jun-07               |
| 3743 / Raymond Dean Hautamaki      | Sarasota Memorial Hospital<br>Institutional Review Board<br>1700 South Tamiami Trail<br>Sarasota, FL 34239                            | Mark Magenheimer MD, PhD<br>John Gallagher                     | 15-Jul-02                                               | 15-Jul-02                  | 25-Aug-03               | 22-Feb-06               | 05-Jul-07               |
| 3744 / William Henderson IV        | Western Institutional Review Board<br>3535 Seventh Avenue,<br>SW<br>Olympia, WA 98502-5010                                            | William C. Jacobs, 2002-2004<br>Theodore D. Schultz, 2005-2008 | 18-Apr-02                                               | 18-Apr-02                  | 28-Jul-03               | 21-Dec-05               | 23-May-07               |
| 3745 / Albrecht Heyder             | Western Institutional Review Board<br>3535 Seventh Avenue,<br>SW<br>Olympia, WA 98502-5010                                            | William C. Jacobs, 2002-2004<br>Theodore D. Schultz, 2005-2008 | 01-Aug-02                                               | 16-May-02                  | 28-Jul-03               | 21-Dec-05               | 23-May-07               |

**USA**

| <b>Centre number(s) / Investigator(s)</b> | <b>IRB or IEC (name/address)</b>                                                                                       | <b>IRB or IEC Chairperson</b>                                  | <b>Informed Consent/Pt. Information Form Approval DD/MM/YY</b> | <b>Protocol Approval DD/MM/YY</b> | <b>Am. 1 Approval DD/MM/YY</b> | <b>Am. 2 Approval DD/MM/YY</b> | <b>Am. 3 Approval DD/MM/YY</b> |
|-------------------------------------------|------------------------------------------------------------------------------------------------------------------------|----------------------------------------------------------------|----------------------------------------------------------------|-----------------------------------|--------------------------------|--------------------------------|--------------------------------|
| 3747 / Thomas Hyers                       | Western Institutional Review Board<br>3535 Seventh Avenue, SW<br>Olympia, WA 98502-5010                                | William C. Jacobs, 2002-2004<br>Theodore D. Schultz, 2005-2008 | 20-Jun-02                                                      | 20-Jun-02                         | 28-Jul-03                      | 21-Dec-05                      | 23-May-07                      |
| 3748 / Jonathan Ilowite                   | Wintrop-University Hospital<br>Institutional Review Board<br>222 Station Plaza North<br>Suite 521<br>Mineola, NY 11501 | Jonathon Davis, 2002-2006                                      | 10-Sep-02                                                      | 20-Jun-02                         | 8-Jul-03                       | 16-Feb-06                      | 07-Jun-07                      |
| 3749 / Mark James                         | Western Institutional Review Board<br>3535 Seventh Avenue, SW<br>Olympia, WA 98502-5010                                | William C. Jacobs, 2002-2004<br>Theodore D. Schultz, 2005-2008 | 16-May-02                                                      | 16-May-02                         | 28-Jul-03                      | 21-Dec-05                      | 23-May-07                      |
| 3750 / Dr. Richard Kahn                   | Western Institutional Review Board<br>3535 Seventh Avenue, SW<br>Olympia, WA 98502-5010                                | William C. Jacobs, 2002-2004<br>Theodore D. Schultz, 2005-2008 | 06-Jun-02                                                      | 06-Jun-02                         | 28-Jul-03                      | 21-Dec-05                      | 23-May-07                      |
| 3751 / Harold Kaiser                      | Western Institutional Review Board<br>3535 Seventh Avenue, SW<br>Olympia, WA 98502-5010                                | William C. Jacobs, 2002-2004<br>Theodore D. Schultz, 2005-     | 09-May-02                                                      | 09-May-02                         | 28-Jul-03                      | 21-Dec-05                      | 23-May-07                      |

## USA

| Centre number(s) / Investigator(s) | IRB or IEC (name/address)                                                                                       | IRB or IEC Chairperson                                         | Informed Consent/Pt. Information Form Approval DD/MM/YY | Protocol Approval DD/MM/YY | Am. 1 Approval DD/MM/YY | Am. 2 Approval DD/MM/YY | Am. 3 Approval DD/MM/YY |
|------------------------------------|-----------------------------------------------------------------------------------------------------------------|----------------------------------------------------------------|---------------------------------------------------------|----------------------------|-------------------------|-------------------------|-------------------------|
|                                    |                                                                                                                 | 2008                                                           |                                                         |                            |                         |                         |                         |
| 3752 / Richard E. Kanner           | University of Utah Institutional Review Board<br>50 North Medical Drive<br>101 MREB<br>Salt Lake City, UT 84132 | Mark Munger, 2002-2005                                         | 26-Aug-02                                               | 26-Aug-02                  | 6-Mar-03                | 11-Apr-06               | 1-Aug-07                |
| 3754 / Mitchell Kaye               | Western Institutional Review Board<br>3535 Seventh Avenue, SW<br>Olympia, WA 98502-5010                         | William C. Jacobs, 2002-2004<br>Theodore D. Schultz, 2005-2006 | 18-Jul-02                                               | 18-Jul-02                  | 28-Jul-03               | 21-Dec-05               | 23-May-07               |
| 3756 / Stephen Kreitzer            | Western Institutional Review Board<br>3535 Seventh Avenue, SW<br>Olympia, WA 98502-5010                         | William C. Jacobs, 2002-2004<br>Theodore D. Schultz, 2005-2006 | 27-Jun-02                                               | 27-Jun-02                  | 28-Jul-03               | 21-Dec-05               | 23-May-07               |
| 3757 / Dennis Lawlor               | Western Institutional Review Board<br>3535 Seventh Avenue, SW<br>Olympia, WA 98502-5010                         | William C. Jacobs, 2002-2004<br>Theodore D. Schultz, 2005-2006 | 11-Jul-02                                               | 11-Jul-02                  | 15-Sept-03              | 21-Dec-05               | 23-May-07               |

## USA

| Centre number(s) / Investigator(s) | IRB or IEC (name/address)                                                                                                                           | IRB or IEC Chairperson                                         | Informed Consent/Pt. Information Form Approval DD/MM/YY | Protocol Approval DD/MM/YY | Am. 1 Approval DD/MM/YY | Am. 2 Approval DD/MM/YY | Am. 3 Approval DD/MM/YY |
|------------------------------------|-----------------------------------------------------------------------------------------------------------------------------------------------------|----------------------------------------------------------------|---------------------------------------------------------|----------------------------|-------------------------|-------------------------|-------------------------|
| 3758 / Irene Leech                 | St. Mary's Medical Center<br>Institutional Review Board<br>1050 Linden Avenue<br>Long Beach, CA 90813                                               | Phill Madden,<br>2002                                          | 02-Aug-02                                               | 02-Aug-02                  | 11-Aug-03               | 10-Jan-07               | 08-Apr-08               |
| 3759 / Bernard Levine              | Western Institutional Review Board<br>3535 Seventh Avenue,<br>SW<br>Olympia, WA 98502-5010                                                          | William C. Jacobs, 2002-2004<br>Theodore D. Schultz, 2005-2006 | 03-Jul-02                                               | 03-Jul-02                  | 28-Jul-03               | 21-Dec-05               | 23-May-07               |
| 3760 / Michael Littner             | Research and Development Human Subjects Sub-committee<br>VA Greater Los Angeles Healthcare System 1611 Plummer Street (111p)<br>Sepulveda, CA 91343 | Ronald Szymusiak 2002-2004<br>Elizabeth Yano 2007              | 21-Oct-02                                               | 21-Oct-02                  | 28-Jul-03               | 23-Jan-06               | 19-July-07              |
| 3761 / Nabil Jarmukli              | Human Studies Subcommittee<br>VA Medical Center<br>1970 Roanoke Blvd.<br>Salem, VA 24153                                                            | Kim Kye, 2001<br>Kim Ragsdale, 2004                            | 07-May-02                                               | 07-May-02                  | 02-Sep-03               | 13-Feb-06               | 01-Aug-07               |
| 3762 / Daniel G. Lorch             | Western Institutional Review Board<br>3535 Seventh Avenue,<br>SW<br>Olympia, WA 98502-5010                                                          | William C. Jacobs, 2002-2004<br>Theodore D. Schultz, 2005-     | 03-Jul-02                                               | 03-Jul-02                  | 28-Jul-03               | 21-Dec-05               | 23-May-07               |

## USA

| Centre number(s) / Investigator(s) | IRB or IEC (name/address)                                                                                                                 | IRB or IEC Chairperson                                          | Informed Consent/Pt. Information Form Approval DD/MM/YY | Protocol Approval DD/MM/YY | Am. 1 Approval DD/MM/YY | Am. 2 Approval DD/MM/YY | Am. 3 Approval DD/MM/YY |
|------------------------------------|-------------------------------------------------------------------------------------------------------------------------------------------|-----------------------------------------------------------------|---------------------------------------------------------|----------------------------|-------------------------|-------------------------|-------------------------|
|                                    |                                                                                                                                           | 2008                                                            |                                                         |                            |                         |                         |                         |
| 3763 / Donald Mahler               | Committee for the Protection of Human Subjects<br>Office of Grants and Contracts<br>11 Rope Ferry Road<br>#6210<br>Hanover, NH 03755-1404 | Eric Larsen<br>2006-2007                                        | 17-Jul-02                                               | 17-Jul-02                  | 29-Aug-03               | 12-Dec-05               | 16-May-07               |
| 3764 / B. Make                     | National Jewish Medical and Research Center<br>Institutional Review Board<br>1400 Jackson Street<br>Denver Colorado 80206                 | Henry Milgram<br>Richard Meehan                                 | 19-Sep-02                                               | 29-Aug-02                  | 17-Jul-03               | 28-Dec-05               | 16-May-07               |
| 3765 / Michael Mandel              | Western Institutional Review Board, 3535 Seventh Avenue, SW, Olympia, WA 98502-5010                                                       | William C. Jacobs, 2002-2004;<br>Theodore D. Schultz, 2005-2008 | 14-Aug-02                                               | 14-Aug-02                  | 28-Jul-03               | 21-Dec-05               | 23-May-07               |
| 3768 / Praveen Mathur              | IUPI and clarion IRB Research & Sponsored Program<br>620 Union Drive Rm 618<br>Indianapolis, IN 46202-                                    | C. Conrad Johnston, MD,<br>2004 - 2008                          | 14-Aug-02                                               | 14-Aug-02                  | 17-Jul-03               | Did not submit to IRB   | 26-Jun-07               |

## USA

| Centre number(s) / Investigator(s) | IRB or IEC (name/address)                                                                                       | IRB or IEC Chairperson                                                  | Informed Consent/Pt. Information Form Approval DD/MM/YY | Protocol Approval DD/MM/YY | Am. 1 Approval DD/MM/YY | Am. 2 Approval DD/MM/YY | Am. 3 Approval DD/MM/YY |
|------------------------------------|-----------------------------------------------------------------------------------------------------------------|-------------------------------------------------------------------------|---------------------------------------------------------|----------------------------|-------------------------|-------------------------|-------------------------|
|                                    | 5167                                                                                                            |                                                                         |                                                         |                            |                         |                         |                         |
| 3770 / Delbert H. Meyer            | Western Institutional Review Board<br>3535 Seventh Avenue SW<br>Olympia, WA 98502                               | William C. Jacobs, 2002-2004<br>Theodore D. Schultz, 2005-2008          | 03-Jul-02                                               | 03-Jul-02                  | 28-Jul-03               | 21-Dec-05               | 23-May-07               |
| 3771 / Michael G. Milam            | Western Institutional Review Board<br>3535 Seventh Avenue, SW<br>Olympia, WA 98502-5010                         | William C. Jacobs, 2002-2004<br>Theodore D. Schultz, 2005-2008          | 02-May-02                                               | 02-May-02                  | 28-Jul-03               | 21-Dec-05               | 23-May-07               |
| 3773 / Zab Mosenifar               | Cedars Sinai Medical CSHS Institutional Review Board<br>83833 Wilshire Blvd. Suite 302<br>Los Angeles, CA 90211 | William C. Jacobs, 2002<br>Scott Cumeen, 2002-2004<br>Stephen Lim, 2005 | 27-Sept-02                                              | 27-Sept-02                 | 16-Jul-03               | 07-Feb-06               | 15-Jun-07               |
| 3775 / Timothy Moriarty            | Western Institutional Review Board<br>3535 Seventh Avenue, SW<br>Olympia, WA 98502-5010                         | William C. Jacobs, 2002-2004<br>Theodore D. Schultz, 2005-2006          | 25-Jul-02                                               | 25-Jun-02                  | 28-Jul-03               | 21-Dec-05               | 23-May-07               |



## USA

| Centre number(s) / Investigator(s) | IRB or IEC (name/address)                                                                     | IRB or IEC Chairperson                                         | Informed Consent/Pt. Information Form Approval DD/MM/YY | Protocol Approval DD/MM/YY | Am. 1 Approval DD/MM/YY | Am. 2 Approval DD/MM/YY | Am. 3 Approval DD/MM/YY |
|------------------------------------|-----------------------------------------------------------------------------------------------|----------------------------------------------------------------|---------------------------------------------------------|----------------------------|-------------------------|-------------------------|-------------------------|
| 3778 / James Ootshi                | Western Institutional Review Board<br>3535 Seventh Avenue, SW<br>Olympia, WA 98502-5010       | William C. Jacobs, 2002-2004<br>Theodore D. Schultz, 2005-2008 | 13-Jun-02                                               | 13-Jun-02                  | 28-Jul-03               | 21-Dec-05               | 23-May-07               |
| 3779 / Rohit Patel                 | Western Institutional Review Board<br>3535 Seventh Avenue, SW<br>Olympia, WA 98502-5010       | William C. Jacobs, 2002-2004<br>Theodore D. Schultz, 2005-2008 | 09-May-02                                               | 09-May-02                  | 28-Jul-03               | 21-Dec-05               | 23-May-07               |
| 3780 / Allan Pratt                 | Gunersen Clinic, Ltd.<br>Human Subjects Committee<br>1836 South Avenue<br>La Crosse, WI 54601 | Bernard J. Hammes,<br>2001 - 2005                              | 24-Apr-02                                               | 24-Apr-02                  | 23-Jul-03               | 15-Dec-05               | 17-May-07               |
| 3781 / Bruce Prenner               | Western Institutional Review Board<br>3535 Seventh Avenue, SW<br>Olympia, WA 98502-5010       | William C. Jacobs, 2002-2004<br>Theodore D. Schultz, 2005-2008 | 25-Jul-02                                               | 25-Jul-02                  | 28-Jul-03               | 21-Dec-05               | 23-May-07               |
| 3782 / Jeffery Rehm                | Western Institutional Review Board<br>3535 Seventh Avenue, SW<br>Olympia, WA 98502-5010       | William C. Jacobs, 2002-2004<br>Theodore D. Schultz, 2005-2008 | 20-Jun-02                                               | 20-Jun-02                  | 28-Jul-03               | 21-Dec-05               | 23-May-07               |

## USA

| Centre number(s) / Investigator(s) | IRB or IEC (name/address)                                                                                                                                                              | IRB or IEC Chairperson                                                    | Informed Consent/Pt. Information Form Approval DD/MM/YY | Protocol Approval DD/MM/YY | Am. 1 Approval DD/MM/YY | Am. 2 Approval DD/MM/YY | Am. 3 Approval DD/MM/YY |
|------------------------------------|----------------------------------------------------------------------------------------------------------------------------------------------------------------------------------------|---------------------------------------------------------------------------|---------------------------------------------------------|----------------------------|-------------------------|-------------------------|-------------------------|
|                                    |                                                                                                                                                                                        |                                                                           |                                                         |                            |                         |                         |                         |
| 3783 / Lawrence Repsher            | Western Institutional Review Board<br>3535 Seventh Avenue,<br>SW<br>Olympia, WA 98502-5010                                                                                             | William C. Jacobs, 2002-2004<br>Theodore D. Schultz, 2005-2008            | 11-Apr-02                                               | 11-Apr-02                  | 28-Jul-03               | 21-Dec-05               | 23-May-07               |
| 3784 / Andrew Ries                 | University California San Diego Human Research Protections Program, 9500 Gilman Drive #0052<br>La Jolla, CA 92093-0052                                                                 | Daniel Masys, 2003-2007                                                   | 06-Jun-02                                               | 06-Jun-02                  | 07-Aug-03               | 23-Feb-06               | 23-May-07               |
| 3785 / Karin B. Rock               | Western Institutional Review Board<br>3535 Seventh Avenue,<br>SW<br>Olympia, WA 98502-5010                                                                                             | William C. Jacobs, 2002-2004<br>Theodore D. Schultz, 2005-2008            | 25-Apr-02                                               | 25-Apr-02                  | 28-Jul-03               | 21-Dec-05               | 23-May-07               |
| 3787 / Amir Sharafkhaneh           | The Institutional Review Board<br>For Human Subject Research at Baylor College of Medicine and Affiliated Hospitals,<br>Baylor College of Medicine, One Baylor Place, Houston TX 77030 | Daniel Epner, 2000<br>Kathleen Motil, 2002-2004<br>Lauren Marangell, 2004 | 02-Oct-02                                               | 02-Oct-02                  | 13-Aug-03               | 31-Mar-06               | 22-Jan-08               |

**USA**

| <b>Centre number(s) / Investigator(s)</b> | <b>IRB or IEC (name/address)</b>                                                                                                      | <b>IRB or IEC Chairperson</b>                                                       | <b>Informed Consent/Pt. Information Form Approval DD/MM/YY</b> | <b>Protocol Approval DD/MM/YY</b> | <b>Am. 1 Approval DD/MM/YY</b> | <b>Am. 2 Approval DD/MM/YY</b> | <b>Am. 3 Approval DD/MM/YY</b> |
|-------------------------------------------|---------------------------------------------------------------------------------------------------------------------------------------|-------------------------------------------------------------------------------------|----------------------------------------------------------------|-----------------------------------|--------------------------------|--------------------------------|--------------------------------|
| 3788 / Gerry San Pedro                    | Louisiana State University Health Sciences Center-Shreveport Institutional Review Board<br>1501 Kings Highway<br>Shreveport, LA 71103 | Jerry McLarty<br>2003-2007                                                          | 26-Sept-02                                                     | 26-Sept-02                        | 08-Jul-03                      | 05-Jan-06                      | 11-May-07                      |
| 3789 / Paul D. Scanlon                    | Mayo Clinic Department of Laboratory Medicine & Pathology<br>200 1 <sup>st</sup> Street S.W<br>Rochester, MN 55905                    | Louis Letendre,<br>2002<br>John Pemberton,<br>2003<br>Randall Pearson,<br>2004-2006 | 30-Jan-03                                                      | 30-Jan-03                         | 07-Jul-03                      | 12-Jan-06                      | 08-Nov-07                      |
| 3790 / Paul Scheinberg                    | Western Institutional Review Board<br>3535 Seventh Avenue,<br>SW<br>Olympia, WA 98502-5010                                            | William C. Jacobs, 2002-2004<br>Theodore D. Schultz, 2005-2008                      | 28-Mar-02                                                      | 28-Mar-02                         | 28-Jul-03                      | 27-Jan-06                      | 23-May-07                      |
| 3791 / Joe Schelbar                       | Western Institutional Review Board<br>3535 Seventh Avenue,<br>SW<br>Olympia, WA 98502-5010                                            | William C. Jacobs, 2002-2004<br>Theodore D. Schultz, 2005-2006                      | 09-May-02                                                      | 09-May-02                         | 28-Jul-03                      | 21-Dec-05                      | 23-May-07                      |
| 3792 / Jeffery Schul                      | Western Institutional Review Board<br>3535 Seventh Avenue,<br>SW                                                                      | William C. Jacobs, 2002-2004<br>Theodore D.                                         | 06-Jun-02                                                      | 06-Jun-02                         | 28 Jul-03                      | 21-Dec-05                      | 23-May-07                      |

**USA**

| <b>Centre number(s) / Investigator(s)</b> | <b>IRB or IEC (name/address)</b>                                                        | <b>IRB or IEC Chairperson</b>                                  | <b>Informed Consent/Pt. Information Form Approval DD/MM/YY</b> | <b>Protocol Approval DD/MM/YY</b> | <b>Am. 1 Approval DD/MM/YY</b> | <b>Am. 2 Approval DD/MM/YY</b> | <b>Am. 3 Approval DD/MM/YY</b> |
|-------------------------------------------|-----------------------------------------------------------------------------------------|----------------------------------------------------------------|----------------------------------------------------------------|-----------------------------------|--------------------------------|--------------------------------|--------------------------------|
|                                           | Olympia, WA 98502-5010                                                                  | Schultz, 2005-2006                                             |                                                                |                                   |                                |                                |                                |
| 3793 / Jonathan Fine                      | Norwalk Hospital Institutional Review Board, Maple Street, Norwalk, CT 06856            | Eric Mazur, 2002<br>Lynda Nemeth, 2003-2006                    | 14-Oct-02                                                      | 14-Oct-02                         | 3-Sept-03                      | 28-Apr-06                      | 07-Jun-07                      |
| 3794/ 3719 / Segall                       | Western Institutional Review Board<br>3535 Seventh Avenue, SW<br>Olympia, WA 98502-5010 | William C. Jacobs, 2002-2004<br>Theodore D. Schultz, 2005-2008 | 02-May-02                                                      | 02-May-02                         | 28-Jul-03                      | 21-Dec-05                      | 23-May-07                      |
| 3795 / Seibert                            | Western Institutional Review Board<br>3535 Seventh Avenue, SW<br>Olympia, WA 98502-5010 | William C. Jacobs, 2002-2004<br>Theodore D. Schultz, 2005-2008 | 13-Jun-02                                                      | 13-Jun-02                         | 28-Jul-03                      | 21-Dec-05                      | 23-May-07                      |
| 3796 / Serfillippi                        | Western Institutional Review Board<br>3535 Seventh Avenue, SW<br>Olympia, WA 98502-5010 | William C. Jacobs, 2002-2004<br>Theodore D. Schultz, 2005-2008 | 28-Mar-02                                                      | 28-Mar-02                         | 28-Jul-03                      | 21-Dec-05                      | 23-May-07                      |
| 3797 / Spirn                              | Western Institutional Review Board<br>3535 Seventh Avenue, SW<br>Olympia, WA 98502-5010 | William C. Jacobs, 2002-2004<br>Theodore D. Schultz, 2005-     | 10-Oct-02                                                      | 10-Oct-02                         | 28-Jul-03                      | 21-Dec-05                      | 23-May-07                      |

## USA

| Centre number(s) / Investigator(s) | IRB or IEC (name/address)                                                                                                                                                     | IRB or IEC Chairperson                                         | Informed Consent/Pt. Information Form Approval DD/MM/YY | Protocol Approval DD/MM/YY | Am. 1 Approval DD/MM/YY | Am. 2 Approval DD/MM/YY | Am. 3 Approval DD/MM/YY |
|------------------------------------|-------------------------------------------------------------------------------------------------------------------------------------------------------------------------------|----------------------------------------------------------------|---------------------------------------------------------|----------------------------|-------------------------|-------------------------|-------------------------|
|                                    |                                                                                                                                                                               | 2008                                                           |                                                         |                            |                         |                         |                         |
| 3799 / Sussman                     | Western Institutional Review Board<br>3535 Seventh Avenue,<br>SW<br>Olympia, WA 98502-5010                                                                                    | William C. Jacobs, 2002-2004<br>Theodore D. Schultz, 2005-2008 | 02-May-02                                               | 02-May-02                  | 28-Jul-03               | 21-Dec-05               | 23-May-07               |
| 3800 / Tashkin                     | Office for Protection of Research Subjects (OPRS)<br>Medical Institutional Review Board<br>1111 Ken Ross Ave Suite 102<br>PO BOX 951694<br>Los Angeles, California 90095-1694 | Lawrence Wollinsky<br>2005-07                                  | 02-Aug-02                                               | 02-Aug-02                  | 12-Sep-03               | 22-Feb-06               | 26-Sept-07              |
| 3802 / Wachtel                     | Western Institutional Review Board<br>3535 Seventh Avenue,<br>SW<br>Olympia, WA 98502-5010                                                                                    | William C. Jacobs, 2002-2004<br>Theodore D. Schultz, 2005-2008 | 06-Jun-02                                               | 06-Jun-02                  | 28-Jul-03               | 21-Dec-05               | 23-May-07               |
| 3804 / Jan. H. Westerman           | Western Institutional Review Board<br>3535 Seventh Avenue,<br>SW<br>Olympia, WA 98502-5010                                                                                    | William C. Jacobs, 2002-2004<br>Theodore D. Schultz, 2005-2008 | 09-May-02                                               | 09-May-02                  | 28-Jul-03               | 21-Dec-05               | 23-May-07               |

**USA**

| <b>Centre number(s) / Investigator(s)</b> | <b>IRB or IEC (name/address)</b>                                                                                                     | <b>IRB or IEC Chairperson</b>                                  | <b>Informed Consent/Pt. Information Form Approval DD/MM/YY</b> | <b>Protocol Approval DD/MM/YY</b> | <b>Am. 1 Approval DD/MM/YY</b> | <b>Am. 2 Approval DD/MM/YY</b> | <b>Am. 3 Approval DD/MM/YY</b> |
|-------------------------------------------|--------------------------------------------------------------------------------------------------------------------------------------|----------------------------------------------------------------|----------------------------------------------------------------|-----------------------------------|--------------------------------|--------------------------------|--------------------------------|
| 3806 / Robert A. Wise                     | Western Institutional Review Board<br>3535 Seventh Avenue, SW<br>Olympia, WA 98502-5010                                              | William C. Jacobs, 2002-2004<br>Theodore D. Schultz, 2005-2008 | 25-Apr-02                                                      | 25-Apr-02                         | 28-Jul-03                      | 21-Dec-05                      | 23-May-07                      |
| 3807 / Ronald Zielinski                   | Western Institutional Review Board<br>3535 Seventh Avenue, SW<br>Olympia, WA 98502-5010                                              | William C. Jacobs, 2002-2004<br>Theodore D. Schultz, 2005-2008 | 13-Jun-02                                                      | 13-Jun-02                         | 28-Jul-03                      | Closed<br>02-Nov-05            | Closed<br>02-Nov-05            |
| 3808 / Richard ZuWallack                  | St. Francis Hospital and Medical Center<br>Institutional Review Board<br>114 Woodland St.<br>Hartford, CT 06105                      | Ernesto Canalis<br>2003-2007                                   | 26-Jun-02                                                      | 26-Jun-02                         | 10-Jul-03                      | 22-Feb-06                      | 9-May-07                       |
| 3809 / Gary Ferguson                      | Western Institutional Review Board<br>3535 Seventh Avenue, SW<br>Olympia, WA 98502-5010                                              | William C. Jacobs, 2002-2004<br>Theodore D. Schultz, 2005-2006 | 19-Sep-02                                                      | 19-Sep-03                         | 28-Jul-03                      | 21-Dec-05                      | 23-May-07                      |
| 3810 / Arthur Gelb                        | Western Institutional Review Board<br>3535 Seventh Avenue, SW<br>Olympia, WA 98502-5010<br>P.O. Box 12029,<br>Olympia, WA 98508-2029 | William C. Jacobs, 2002-2004<br>Theodore D. Schultz, 2005-2008 | 29-Aug-02                                                      | 29-Aug-02                         | 28-Jul-03                      | 21-Dec-05                      | 23-May-07                      |

## USA

| <b>Centre number(s) / Investigator(s)</b> | <b>IRB or IEC (name/address)</b>                                                                                                                | <b>IRB or IEC Chairperson</b>                      | <b>Informed Consent/Pt. Information Form Approval DD/MM/YY</b> | <b>Protocol Approval DD/MM/YY</b> | <b>Am. 1 Approval DD/MM/YY</b> | <b>Am. 2 Approval DD/MM/YY</b> | <b>Am. 3 Approval DD/MM/YY</b> |
|-------------------------------------------|-------------------------------------------------------------------------------------------------------------------------------------------------|----------------------------------------------------|----------------------------------------------------------------|-----------------------------------|--------------------------------|--------------------------------|--------------------------------|
| 3811 / Dr. Ware G. Kuschner               | Stanford University<br>Administrative Panel of Human Subjects in Medical Research<br>1215 Welch Road,<br>Modular A<br>Stanford, CA 94395 – 5401 | David Oakes,<br>2002-2006                          | 05-Nov-02                                                      | 05-Nov-02                         | 5-Aug-03                       | 7-Feb-06                       | 20-Jun-07                      |
| 3812 / Kees Mahutte                       | Human Studies Subcommittee<br>VA Long Beach Healthcare System<br>5901 East 7 <sup>th</sup> Street (09-151)<br>Long Beach, CA 90822              | James Hagar,<br>2002-2003                          | 31-Jan-03                                                      | 31-Jan-03                         | 10-Jul-03                      | 19-Dec-05                      | 31-May-07                      |
| 3813 / Fernando Martinez                  | Medical School Institutional Review Board (IRBMED), 4558 Kresge Medical Research Building, Ann Arbor, MI 48109-0570                             | Vernon K. Sondak, 2002-2003                        | 14-Nov-02                                                      | 14-Nov-02                         | 02-Oct-03                      | 09-Feb-06                      | 29-Apr-08                      |
| 3814 / Mark Plautz                        | Veterans Affairs Medical Center #151, Attention Human Studies Committee, 4801 East Linwood Blvd., Kansas City MO 64128                          | James Hamilton,<br>2004                            | 31-Dec-02                                                      | 31-Dec-02                         | 10-Jul-03                      | 12-Jan-06                      | 9-May-07                       |
| 3815 / Carolyn Rochester                  | VA Connecticut Health System IRB Human Studies Sub-Committee                                                                                    | Robert Kerns,<br>2002-2003<br>Morris Bell,<br>2005 | 28-Feb-03                                                      | 28-Feb-03                         | 14-Aug-03                      | 01-Mar-07                      | 7-Jun-07                       |

## USA

| Centre number(s) / Investigator(s) | IRB or IEC (name/address)                                                                                                                                          | IRB or IEC Chairperson                                                | Informed Consent/Pt. Information Form Approval DD/MM/YY | Protocol Approval DD/MM/YY | Am. 1 Approval DD/MM/YY                                          | Am. 2 Approval DD/MM/YY | Am. 3 Approval DD/MM/YY |
|------------------------------------|--------------------------------------------------------------------------------------------------------------------------------------------------------------------|-----------------------------------------------------------------------|---------------------------------------------------------|----------------------------|------------------------------------------------------------------|-------------------------|-------------------------|
|                                    | Research 1151 Attn. Cora Mileski<br>950 Campbell Avenue<br>West Haven, CT 06516                                                                                    |                                                                       |                                                         |                            |                                                                  |                         |                         |
| 3816 / Gregory Schilero            | Bronx Veterans Affairs Medical Center Research Program<br>The Research and Development Office, 151 Room 1F01<br>130 West Kingsbridge Road<br>Bronx, New York 10468 | Lawrence Feinman,<br>2002-2004<br>Sheldon Brown, 2004                 | 10-Apr-03                                               | 09-Jan-03                  | Did not submit All patients completed visit 2 prior to amendment | 13-Jul-06               | 07-Jun-07               |
| 3817 / Gregory Tino                | University of Pennsylvania<br>Mezzaine Level, Mellon Bank Building, 133 S. 36 <sup>th</sup> Street, Philadelphia, PA 19104                                         | Does not closure the Chairman's name but meets the ICH.GCP guidelines | 15-Jan-03                                               | 15-Jan-03                  | 9-Jul-03                                                         | 18 Dec-06               | Closed                  |
| 3818 / Gerard Turino               | St. Luke's – Roosevelt Hospital Center,<br>Institutional Review Board, 432 West 58 <sup>th</sup> Street – Room 207, New York, New York 10019                       | Airlie Cameron<br>2003-2007                                           | 16-Dec-02                                               | 16-Dec-02                  | 18-Nov-03                                                        | 8-May-06                | 23-May-07               |
| 3820 / John Keppel                 | Western Institutional Review Board<br>3535 Seventh Avenue,<br>SW, Olympia, WA 98502-5010, P.O. Box 12029,                                                          | William C. Jacobs, 2002-2004<br>Theodore D. Schultz, 2005-            | 19-Sept-02                                              | 19-Sept-02                 | 28-Jul-03                                                        | 21-Dec-05               | 23-May-07               |



## USA

| <b>Centre number(s) / Investigator(s)</b> | <b>IRB or IEC (name/address)</b> | <b>IRB or IEC Chairperson</b> | <b>Informed Consent/Pt. Information Form Approval DD/MM/YY</b> | <b>Protocol Approval DD/MM/YY</b> | <b>Am. 1 Approval DD/MM/YY</b> | <b>Am. 2 Approval DD/MM/YY</b> | <b>Am. 3 Approval DD/MM/YY</b> |
|-------------------------------------------|----------------------------------|-------------------------------|----------------------------------------------------------------|-----------------------------------|--------------------------------|--------------------------------|--------------------------------|
|                                           | Olympia, WA,<br>98508-2029       | 2008                          |                                                                |                                   |                                |                                |                                |
